# Supplementary material
Source: PubMed Central journal article supplement (PMC8177055)
Supplement: NIHMS1706158-supplement-SI.pdf [file NIHMS1706158-supplement-SI.pdf]

## **Supporting information**

# **Determining the Inherent Selectivity for Carbon Radical Hydroxylation Versus Halogenation with Fe<sup>III</sup>(OH)(X) Complexes: Relevance to the Rebound Step in Nonheme Iron Halogenases**

Vishal Yadav, Rodolfo J. Rodriguez,

Maxime A. Siegler, David P. Goldberg\*

Department of Chemistry, The Johns Hopkins University, Baltimore,  
Maryland 21218, United States

## Table of contents

|                                             |                |
|---------------------------------------------|----------------|
| <b>A. Materials and methods .....</b>       | <b>S3-S4</b>   |
| <b>B. Synthesis of metal complexes.....</b> | <b>S5-S8</b>   |
| <b>C. Experimental details.....</b>         | <b>S8-S16</b>  |
| <b>D. Supporting tables.....</b>            | <b>S17-S38</b> |
| <b>E. Supporting figures.....</b>           | <b>S39-S79</b> |
| <b>F. References .....</b>                  | <b>S80</b>     |

## **A. Materials and instrumentation.**

**Materials.** All syntheses and manipulations were conducted in an N<sub>2</sub>-filled drybox (Vacuum Atmospheres, O<sub>2</sub> < 0.2 ppm, H<sub>2</sub>O < 0.5 ppm) or using standard Schlenk techniques under an atmosphere of Ar unless otherwise noted. Fe(OTf)<sub>2</sub>•2MeCN and <sup>57</sup>Fe(OTf)<sub>2</sub>•2MeCN were prepared according to a literature procedure.<sup>1</sup> Powdered <sup>57</sup>Fe metal (95.93%) was purchased from Cambridge Isotope Laboratories. Anhydrous FeCl<sub>2</sub>, FeBr<sub>2</sub>, FeCl<sub>3</sub>, tetrabutylammonium chloride and tetrabutylammonium bromide were purchased from Sigma-Aldrich and dried over P<sub>2</sub>O<sub>5</sub> under vacuum before use. The isotopically labelled <sup>18</sup>O<sub>2</sub> (98 atom %) was purchased from ICON Isotopes (Summit, N.J.). Acetonitrile and acetonitrile-*d*<sub>3</sub> were distilled from CaH<sub>2</sub>. Tetrahydrofuran, tetrahydrofuran-*d*<sub>8</sub>, toluene and toluene-*d*<sub>8</sub> were dried over Na/benzophenone and subsequently distilled. All other non-deuterated solvents were obtained from a Pure-solv solvent purification system from Innovative Technologies, Inc. Anhydrous 2-methyltetrahydrofuran and pentane (sure seal) were purchased from Sigma-Aldrich, and distilled over Na/benzophenone. All solvents were degassed by a minimum of three freeze–pump–thaw cycles and stored over freshly activated 3 Å molecular sieves in the drybox following distillation. All other reagents were purchased from commercial vendors and used without further purification. The ligand BNPA<sup>Ph2</sup>OH was prepared by a literature procedure<sup>2</sup> and was dried over P<sub>2</sub>O<sub>5</sub> for 12 h under vacuum before metalation. The compounds tris(*p*-methoxyphenyl)methyl radical,<sup>3</sup> tris(*p*-chlorophenyl)methyl radical,<sup>3</sup> Fe<sup>II</sup>(BNPA<sup>Ph2</sup>O)(OTf),<sup>2</sup> <sup>57</sup>Fe<sup>II</sup>(BNPA<sup>Ph2</sup>O)(OTf),<sup>2</sup> Fe<sup>II</sup>(BNPA<sup>Ph2</sup>O)(OH)(OTf),<sup>2</sup> <sup>57</sup>Fe<sup>II</sup>(BNPA<sup>Ph2</sup>O)(OH)(OTf)<sup>2</sup> and Gomberg's dimer<sup>4</sup> ((Ph<sub>3</sub>C)<sub>2</sub>) were synthesized following literature procedures.

**Instrumentation.** The <sup>1</sup>H NMR spectra were measured on a Bruker 300 MHz or a Bruker 400 MHz NMR spectrometer. Chemical shifts were referenced to reported solvent resonances.<sup>5</sup> UV–vis experiments were carried out on a Cary 60 UV–vis spectrophotometer equipped with a Unisoku USP-203A cryostat using a 1 cm modified Schlenk cuvette. Midwest Microlab LLC (Indianapolis, IN) conducted elemental analyses on samples prepared and shipped in ampules sealed under vacuum. Mössbauer spectra were recorded on a

spectrometer from SEE Co. (Edina, MN) operating in the constant acceleration mode in a transmission geometry. The sample was kept in an SVT-400 cryostat from Janis Research Co. (Wilmington, MA), using liquid N<sub>2</sub> as a cryogen for 80 K measurements. Isomer shifts were determined relative to the centroid of the spectrum of a metallic foil of  $\alpha$ -Fe collected at room temperature. Data analysis was performed using version F of the program WMOSS ([www.wmoss.org](http://www.wmoss.org)), and quadrupole doublets were fit to Lorentzian lineshapes. Electron paramagnetic resonance (EPR) spectra were recorded with a Bruker EMX spectrometer equipped with a Bruker ER 041 X G microwave bridge and a continuous-flow liquid helium cryostat (ESR900) coupled to an Oxford Instruments TC503 temperature controller for low temperature data collection.

#### **DFT computational study.**

All calculations were performed with the ORCA-4.0.1.2 program package.<sup>6</sup> Initial geometries were obtained from X-ray crystallographic models. Optimized geometries were calculated using the B3LYP functional. The 6-311g\* basis set was used for all Fe, N, O, Cl and Br atoms and the 6-31g\* basis set was used for all C and H atoms. Frequency calculations at the same level of theory confirmed that all optimizations had converged to true minima on the potential energy surface (i.e., no imaginary frequencies).

## B. Synthesis of metal complexes.

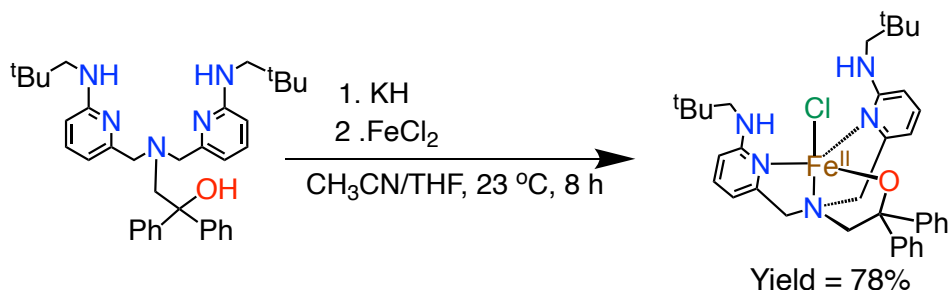

**Fe<sup>II</sup>(BNPA<sup>Ph<sub>2</sub>O</sup>)(Cl) (1).** The ligand BNPA<sup>Ph<sub>2</sub>O</sup>OH (58.7 mg, 0.11 mmol) was dissolved in THF (2 mL) and a suspension of KH (4.0 mg, 0.11 mmol) in THF (1 mL) was added. The solution was stirred for 1 h at 23 °C. An amount of anhydrous FeCl<sub>2</sub> (13.0 mg, 0.11 mmol) was dissolved in acetonitrile (2 mL) and added dropwise to the BNPA<sup>Ph<sub>2</sub>O</sup>OH/KH mixture. An immediate color change from colorless to dark yellow was noted, and the reaction mixture was stirred for 8 h. The resulting dark yellow reaction mixture was evaporated to dryness under vacuum giving a dark yellow solid. The yellow solid was dissolved in THF and filtered through Celite and the solution was left to stand with slow vapor diffusion of pentane. Yellow crystals (blocks, 53 mg (78%)) suitable for X-ray diffraction were obtained after 3 d. UV-vis (THF)  $\lambda_{\text{max}}$  ( $\epsilon$ , M<sup>-1</sup> cm<sup>-1</sup>) = 330 nm (10965), 425 nm (276). Anal. Calcd for C<sub>36</sub>H<sub>46</sub>ClFeN<sub>5</sub>O: C, 65.90; H, 7.25; N, 10.67. Found: C, 65.35; H, 7.52; N, 9.76. <sup>1</sup>H NMR (CD<sub>3</sub>CN, 400 MHz):  $\delta$  73.31, 70.15, 56.41, 25.28, 23.80, 11.47, 9.05, 5.48, 3.67, 0.24, -11.30 ppm.

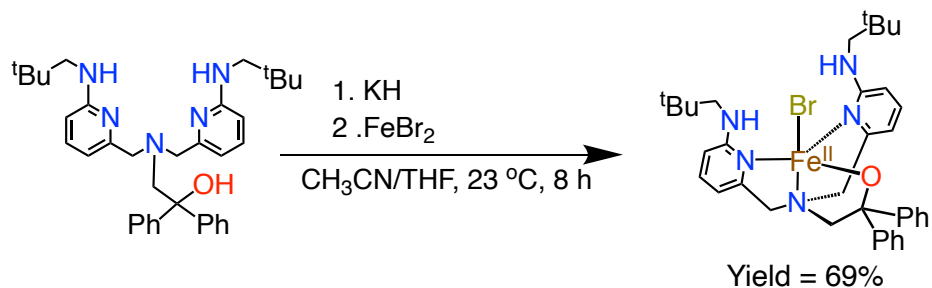

**Fe<sup>II</sup>(BNPA<sup>Ph<sub>2</sub>O</sup>)(Br) (2).** The ligand BNPA<sup>Ph<sub>2</sub>O</sup>OH (56 mg, 0.10 mmol) was dissolved in THF (2 mL) and a suspension of KH (4 mg, 0.10 mmol) in THF (1 mL) was added. The solution was stirred for 1 h at 23 °C. An amount of anhydrous FeBr<sub>2</sub> (22 mg, 0.10 mmol) was dissolved in acetonitrile (2 mL) and added

dropwise to the BNPA<sup>Ph2</sup>OH/KH mixture. An immediate color change from colorless to dark yellow was noted, and the reaction mixture was stirred for 8 h. The resulting dark yellow reaction mixture was evaporated to dryness under vacuum giving a dark yellow solid. The yellow solid was dissolved in THF and filtered through Celite and the solution was left to stand with slow vapor diffusion of pentane. Yellow crystals (blocks, 48 mg (69%)) suitable for X-ray diffraction were obtained after 3 d. UV-vis (THF)  $\lambda_{\max}$  ( $\epsilon$ , M<sup>-1</sup> cm<sup>-1</sup>) = 330 nm (11500), 420 nm (368). Anal. Calcd for C<sub>36</sub>H<sub>46</sub>BrFeN<sub>5</sub>O: C, 61.72; H, 6.62; N, 10.00. Found: C, 61.28; H, 6.74; N, 9.96. <sup>1</sup>H NMR (CD<sub>3</sub>CN, 400 MHz):  $\delta$  79.56, 71.56, 56.86, 25.94, 23.21, 11.07, 8.66, 5.74, 3.45, 1.15, 0.02, -0.54, -11.70 ppm.

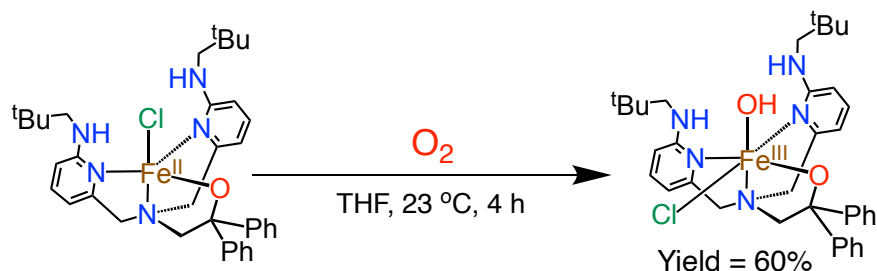

**Fe<sup>III</sup>(BNPA<sup>Ph2</sup>O)(OH)(Cl) (3).** Crystalline **1** (30.0 mg, 0.045 mmol) was dissolved in THF (5 – 10 mL), and this solution was bubbled with excess, dry O<sub>2</sub> for 15 min, causing a color change from yellow to bright orange. The reaction was stirred for 4 h at 23 °C, and the final dark red solution was evaporated to dryness under vacuum to give a dark orange solid. This solid was dissolved in THF and filtered through a Celite bed to remove insoluble material. The resulting dark red filtrate was evaporated to dryness under vacuum and washed with Et<sub>2</sub>O and pentane to give a dark orange powder, which was dissolved in THF and the solution was left to stand with slow vapor diffusion of pentane. Bright orange crystals (blocks, 18.4 mg (60%)), suitable for X-ray diffraction were obtained after 2 d. UV-vis (THF)  $\lambda_{\max}$  ( $\epsilon$ , M<sup>-1</sup> cm<sup>-1</sup>) = 325 nm (12000), 425 nm (1615). Anal. Calcd for C<sub>36</sub>H<sub>47</sub>ClFeN<sub>5</sub>O<sub>2</sub>: C, 64.24; H, 7.04; N, 10.40. Found: C, 64.04; H, 6.99; N, 10.29. <sup>1</sup>H NMR (CD<sub>3</sub>CN, 400 MHz):  $\delta$  74.41, 15.43, 10.65, 7.79, 7.14, 3.67 ppm.

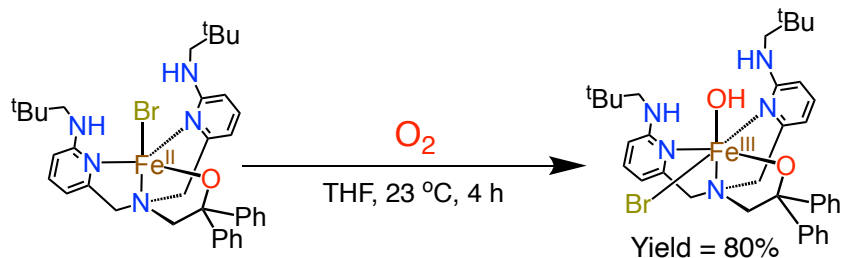

**Fe<sup>III</sup>(BNPA<sup>Ph2</sup>O)(OH)(Br) (4).** Crystalline **2** (30.0 mg, 0.042 mmol) was dissolved in THF (5 – 10 mL), and this solution was bubbled with excess, dry O<sub>2</sub> for 15 min, causing a color change from yellow to dark orange. The reaction was stirred for 4 h at 23 °C, and the final dark red solution was evaporated to dryness under vacuum to give a dark orange solid. This solid was dissolved in THF and filtered through a Celite bed to remove insoluble material. The resulting dark red filtrate was evaporated to dryness under vacuum and washed with Et<sub>2</sub>O and pentane to give a dark orange powder, which was dissolved in THF and the solution was left to stand with slow vapor diffusion of pentane. Bright orange crystals (blocks, 24.6 mg (80%)), suitable for X-ray diffraction were obtained after 2 d. UV-vis (THF) λ<sub>max</sub> (ε, M<sup>-1</sup> cm<sup>-1</sup>) = 325 nm (11500), 415 nm (1360), 440 nm (880). Anal. Calcd for C<sub>36</sub>H<sub>47</sub>BrFeN<sub>5</sub>O<sub>2</sub>: C, 60.26; H, 6.60; N, 9.76. Found: C, 59.72; H, 6.45; N, 9.22. <sup>1</sup>H NMR (CD<sub>3</sub>CN, 400 MHz): δ 74.91, 15.43, 10.66, 7.09, 3.68 ppm.

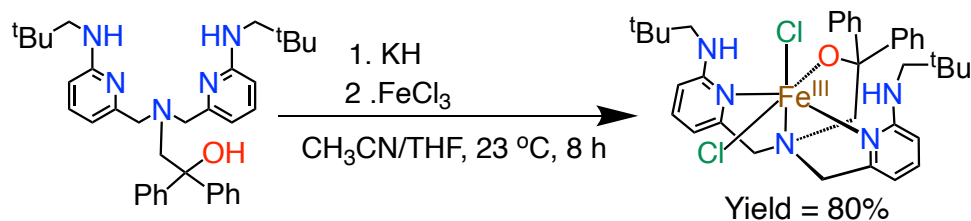

**Fe<sup>III</sup>(BNPA<sup>Ph2</sup>O)(Cl)<sub>2</sub> (5).** The ligand BNPA<sup>Ph2</sup>OH (70.8 mg, 0.125 mmol) was dissolved in THF (2 mL) and a suspension of KH (5.0 mg, 0.125 mmol) in THF (1 mL) was added. The solution was stirred for 1 h at 23 °C. An amount of anhydrous FeCl<sub>3</sub> (20.6 mg, 0.125 mmol) was dissolved in acetonitrile (2 mL) and added dropwise to the BNPA<sup>Ph2</sup>OH/KH mixture. An immediate color change from colorless to dark red was noted, and the reaction mixture was stirred for 8 h. The resulting dark red reaction mixture was evaporated to dryness under vacuum giving a dark red solid. The red solid was dissolved in THF and filtered through Celite and the solution was left to stand with slow vapor diffusion of pentane. Red crystals (blocks, 70 mg (80%)) suitable for X-ray diffraction were obtained after 3 d. UV-vis (CH<sub>3</sub>CN) λ<sub>max</sub> (ε, M<sup>-1</sup> cm<sup>-1</sup>) =

320 nm (10090), 375 nm (2800), 425 nm (1120). Anal. Calcd for  $C_{36}H_{47}Cl_2FeN_5O$ : C, 60.53; H, 6.71; N, 10.13. Found: C, 59.72; H, 6.45; N, 9.76.  $^1H$  NMR ( $CD_3CN$ , 400 MHz):  $\delta$  65.67, 17.47, 15.29, 8.54, 7.79, 3.67, 0.92, -1.61, -2.89 ppm.

### C. Experimental Procedure

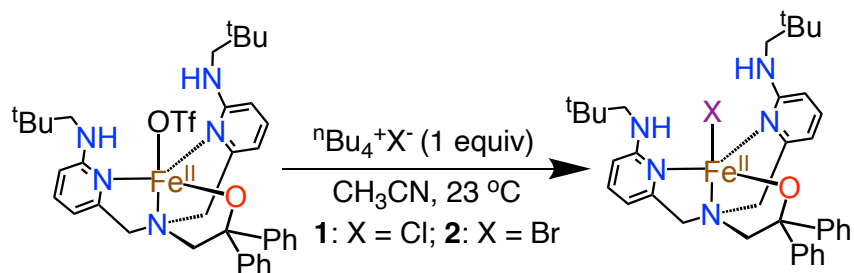

**Preparation of  $^{57}Fe$ -enriched **1** and **2** for Mössbauer spectroscopy.** Crystalline  $^{57}Fe^{II}(BNPA^{Ph_2O})(OTf)$  (3 mg) was dissolved in  $CH_3CN$  (500  $\mu$ L, 8 mM) and  $nBu_4NX$  ( $X = Cl, Br$ ) (1 equiv) was added causing a color change from colorless to dark yellow. The completion of the reaction was verified by  $^1H$  NMR spectroscopy which showed the disappearance of the peaks corresponding to the  $^{57}Fe^{II}(BNPA^{Ph_2O})(OTf)$  and formation of new peaks corresponding to  $Fe^{II}(X)$  complexes. The solvent was removed, the solid was dissolved in 2-MeTHF (300  $\mu$ L, 11 mM) and transferred into a Mössbauer cup. The sample was then frozen in liquid nitrogen, and Mössbauer spectra were collected at 80 K in the absence of any external magnetic field.

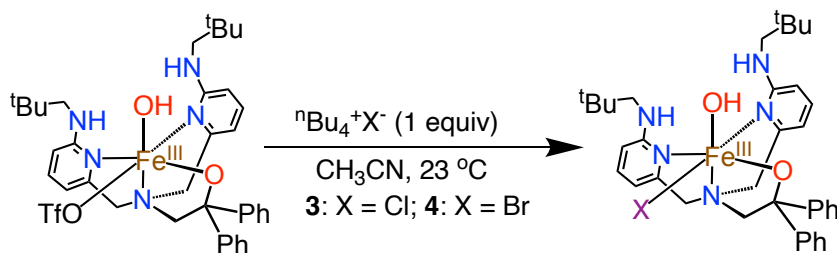

**Preparation of  $^{57}Fe$  enriched **3** and **4** for Mössbauer spectroscopy.** Crystalline  $^{57}Fe^{III}(BNPA^{Ph_2O})(OH)(OTf)$  (3 mg) was dissolved in  $CH_3CN$  (500  $\mu$ L, 7.6 mM) and  $nBu_4NX$  ( $X = Cl, Br$ ) (1 equiv) was added causing a color change from colorless to dark yellow. The completion of the reaction



was verified by  $^1\text{H}$  NMR spectroscopy which showed the disappearance of the peaks corresponding to the  $^{57}\text{Fe}^{\text{III}}(\text{BNPA}^{\text{Ph}_2}\text{O})(\text{OH})(\text{OTf})$  and formation of new peaks corresponding to  $\text{Fe}^{\text{III}}(\text{OH})(\text{X})$  complexes. The solvent was removed, a solid film was made in the Mössbauer cup, and Mössbauer spectra were collected at 80 K in the absence of any external magnetic field.

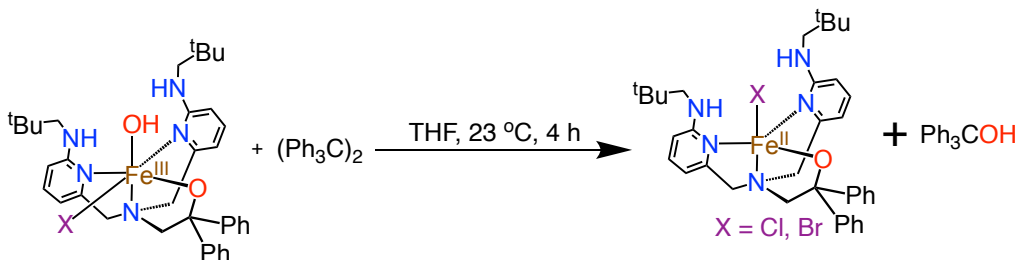

**Reaction of 3 - 4 with triphenylmethyl radical ( $\text{Ph}_3\text{C}\cdot$ ).** Crystalline **3** (5.0 mg, 0.006 mmol) was dissolved in a THF-toluene mixture (4/1 v/v) and excess  $(\text{Ph}_3\text{C})_2$  (30 mg, 0.064 mmol, 10 equiv) was added. The reaction mixture was stirred in the dark for 4 h at 23 °C. The reaction mixture turned from bright orange to dark yellow, and then was dried under vacuum to give a dark yellow solid. The residue was dissolved in  $\text{CD}_3\text{CN}$  and analyzed by  $^1\text{H}$  NMR spectroscopy. The  $^1\text{H}$  NMR spectrum showed complete disappearance of the broad, paramagnetically shifted peaks for **3**, and appearance of the relatively sharp, paramagnetically shifted peaks corresponding to the **1**. For analysis by Mössbauer spectroscopy, complex **3** was enriched in  $^{57}\text{Fe}$  (95.93%) and 2-MeTHF was employed in place of  $\text{CD}_3\text{CN}$  because 2-MeTHF gives a better resolved, sharp doublet for the Mössbauer spectrum of **1**. The Mössbauer spectrum (80 K) of the final reaction mixture showed a sharp quadrupole doublet ( $\delta = 1.02$ ,  $|\Delta E_Q| = 2.69 \text{ mm s}^{-1}$ , 91% of the fit) corresponding to **1**. The analogous reaction was performed with **4** (5.0 mg, 0.006 mmol) under identical reaction conditions, yielding **2** as seen by  $^1\text{H}$  NMR and  $^{57}\text{Fe}$  Mössbauer spectroscopy.

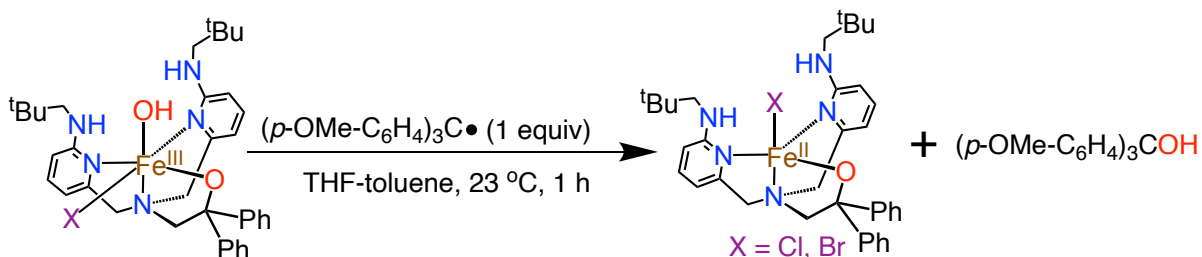

**Reaction between 3 - 4 and (*p*-OMe-C<sub>6</sub>H<sub>4</sub>)<sub>3</sub>C•.** Crystalline **3** (3.0 mg, 0.004 mmol) was dissolved in THF (600 μL). The radical (*p*-OMe-C<sub>6</sub>H<sub>4</sub>)<sub>3</sub>C• was freshly prepared according to a literature procedure,<sup>3</sup> as follows: an amount of (*p*-OMe-C<sub>6</sub>H<sub>4</sub>)<sub>3</sub>CCl (21 mg, 0.057 mmol) was dissolved in toluene-*d*<sub>8</sub> (1 mL), excess Cu powder was added, and the heterogenous mixture was heated in the dark for 1 h at 75 °C. The resulting dark red solution was cooled to 23 °C, filtered through Celite, and an aliquot of this solution (120 μL, 1 equiv) was added to **3**. The reaction was stirred for 1 h, and then the solvent was removed under vacuum to give an orange residue, which was dissolved in CD<sub>3</sub>CN and analyzed by <sup>1</sup>H NMR spectroscopy. The <sup>1</sup>H NMR spectrum showed complete disappearance of the broad, paramagnetically shifted peaks for **3**, and appearance of the relatively sharp, paramagnetically shifted peaks corresponding to **1**. For analysis by Mössbauer spectroscopy, complex **3** was enriched in <sup>57</sup>Fe (95.93%) and 2-MeTHF was employed in place of CD<sub>3</sub>CN because it gives a better resolved, sharp doublet for the Mössbauer spectrum of **1**. The Mössbauer spectrum (80 K) of the final reaction mixture showed a sharp quadrupole doublet ( $\delta = 1.02$ ,  $|\Delta E_Q| = 2.69$  mm s<sup>-1</sup>, 92 % of the fit) corresponding to **1**. The analogous reaction was performed with **4** (3.0 mg, 0.004 mmol) under identical reaction conditions, yielding **2** as seen by <sup>1</sup>H NMR and <sup>57</sup>Fe Mössbauer spectroscopy.

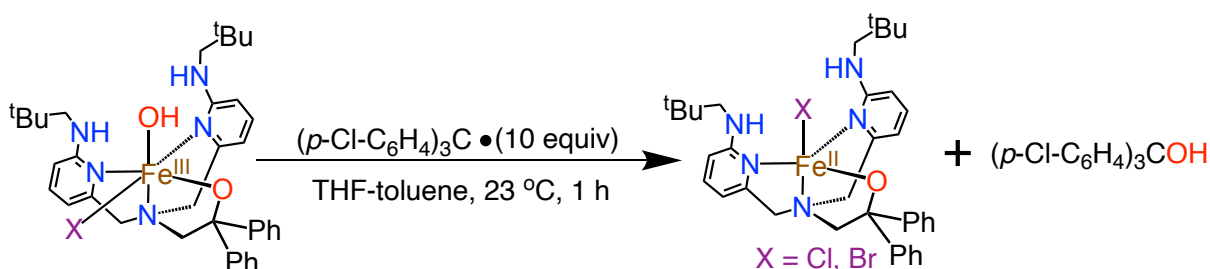

**Reaction between 3 - 4 and (*p*-Cl-C<sub>6</sub>H<sub>4</sub>)<sub>3</sub>C•.** Crystalline **3** (3.0 mg, 0.004 mmol) was dissolved in THF (1 mL). The radical (*p*-Cl-C<sub>6</sub>H<sub>4</sub>)<sub>3</sub>C• was freshly prepared according to a literature procedure,<sup>3</sup> as follows: an amount of (*p*-Cl-C<sub>6</sub>H<sub>4</sub>)<sub>3</sub>CBr (35.5 mg, 0.083 mmol) was dissolved in toluene-*d*<sub>8</sub> (1 mL), excess Cu powder was added, and the heterogenous mixture was heated in the dark for 1 h at 75 °C. The resulting dark red solution was cooled to 23 °C, filtered through Celite, and an aliquot of this solution (500 μL, 10 equiv) was added to **3**. The reaction was stirred for 1 h, and then the solvent was removed under vacuum to give an orange residue, which was dissolved in CD<sub>3</sub>CN and analyzed by <sup>1</sup>H NMR spectroscopy. The <sup>1</sup>H NMR

spectrum showed complete disappearance of the broad, paramagnetically shifted peaks for **3**, and appearance of the relatively sharp, paramagnetically shifted peaks corresponding to **1**. For analysis by Mössbauer spectroscopy, **3** was enriched in  $^{57}\text{Fe}$  (95.93%) and 2-MeTHF was employed in place of  $\text{CD}_3\text{CN}$  because it gives a better resolved, sharp doublet for the Mössbauer spectrum of **1**. The Mössbauer spectrum (80 K) showed of the final reaction mixture a sharp quadrupole doublet ( $\delta = 1.02$ ,  $|\Delta E_Q| = 2.69 \text{ mm s}^{-1}$ , 94 % of the fit) corresponding to **1**. The analogous reaction was performed with **4** (3.0 mg, 0.004 mmol) under identical reaction conditions, yielding **2** as seen by  $^1\text{H}$  NMR and  $^{57}\text{Fe}$  Mössbauer spectroscopy.

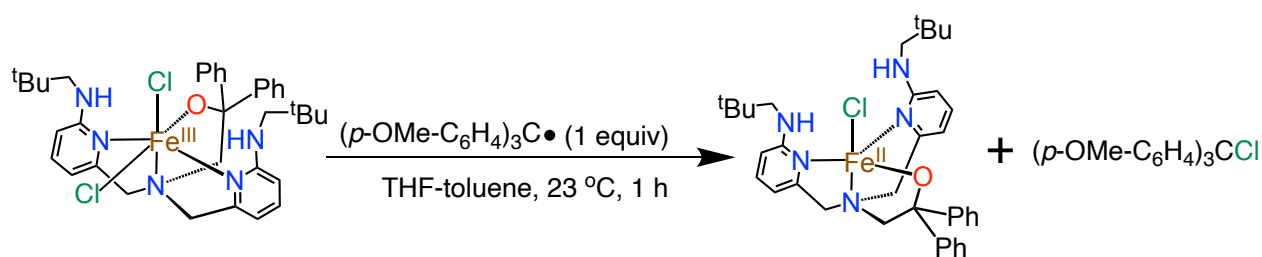

**Reaction between **5** and  $(p\text{-OMe-C}_6\text{H}_4)_3\text{C}\bullet$ .** Crystalline **5** (3.0 mg, 0.004 mmol) was dissolved in THF (600  $\mu\text{L}$ ). The radical  $(p\text{-OMe-C}_6\text{H}_4)_3\text{C}\bullet$  was freshly prepared according to a literature procedure,<sup>3</sup> as follows: an amount of  $(p\text{-OMe-C}_6\text{H}_4)_3\text{CCl}$  (21 mg, 0.057 mmol) was dissolved in toluene- $d_8$  (1 mL), excess Cu powder was added, and the heterogenous mixture was heated in the dark for 1 h at 75 °C. The resulting dark red solution was cooled to 23 °C, filtered through Celite, and an aliquot of this solution (100  $\mu\text{L}$ , 1 equiv) was added to **5**. The reaction was stirred for 2 h, and then the solvent was removed under vacuum to give an orange residue, which was dissolved in  $\text{CD}_3\text{CN}$  and analyzed by  $^1\text{H}$  NMR spectroscopy. The  $^1\text{H}$  NMR spectrum showed complete disappearance of the broad, paramagnetically shifted peaks for **5**, and appearance of the relatively sharp, paramagnetically shifted peaks corresponding to **1**.

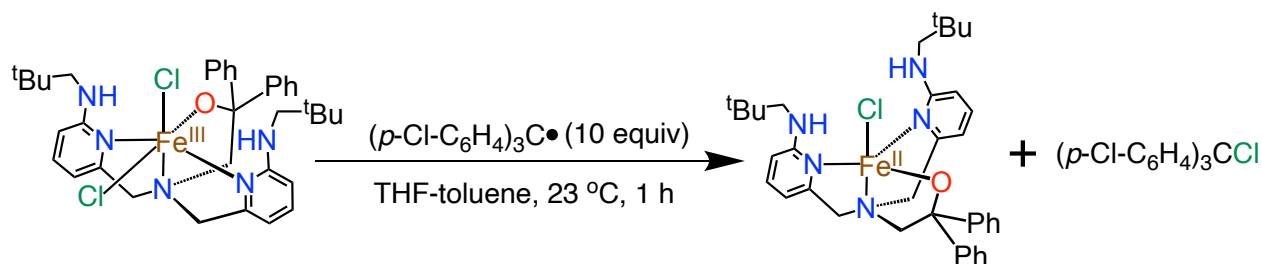

**Reaction between 5 and (*p*-Cl-C<sub>6</sub>H<sub>4</sub>)<sub>3</sub>C•.** Crystalline **5** (3.0 mg, 0.004 mmol) was dissolved in THF (1 mL). The radical (*p*-Cl-C<sub>6</sub>H<sub>4</sub>)<sub>3</sub>C• was freshly prepared according to a literature procedure,<sup>3</sup> as follows: an amount of (*p*-Cl-C<sub>6</sub>H<sub>4</sub>)<sub>3</sub>CBr (35.5 mg, 0.056 mmol) was dissolved in toluene-*d*<sub>8</sub> (1 mL), excess Cu powder was added, and the heterogenous mixture was heated in the dark for 1 h at 75 °C. The resulting dark red solution was cooled to 23 °C, filtered through Celite, and an aliquot of this solution (500 μL, 10 equiv) was added to **5**. The reaction was stirred for 1 h, and then the solvent was removed under vacuum to give an orange residue, which was dissolved in CD<sub>3</sub>CN and analyzed by <sup>1</sup>H NMR spectroscopy. The <sup>1</sup>H NMR spectrum showed complete disappearance of the broad, paramagnetically shifted peaks for the Fe<sup>III</sup>(Cl)<sub>2</sub> complex **5**, and appearance of the relatively sharp, paramagnetically shifted peaks corresponding to the Fe<sup>II</sup>(Cl) complex **1**.

**Quantification of Ph<sub>3</sub>COH.** A stock solution was prepared by dissolving crystalline **3** (5 mg, 0.007 mmol) in THF-*d*<sub>8</sub> (1.5 mL, 4.96 mM). Solid (Ph<sub>3</sub>C)<sub>2</sub> (11.4 mg, 0.0235 mmol, 10 equiv) was added to the stock solution of **3** in THF-*d*<sub>8</sub>/toluene- *d*<sub>8</sub> (500 μL, 4.96 mM) and stirred in the dark for 4 h. An amount of trimethylphenylsilane (TMPS) (10 μL, 7 mM) was added as an internal standard, and the mixture was analyzed by <sup>1</sup>H NMR spectroscopy. A well-separated singlet at 5.50 ppm was observed, which was assigned to the OH proton of Ph<sub>3</sub>COH based on comparison with an authentic sample. Integration of this peak and comparison with the TMPS standard gave an average yield (3 runs) for Ph<sub>3</sub>COH of 91 ± 3%. The same procedure was employed for **4**, giving an average yield (3 runs) for Ph<sub>3</sub>COH of 88 ± 3%.

**Quantification of (*p*-OMe-C<sub>6</sub>H<sub>4</sub>)<sub>3</sub>COH.** The same procedure as described for Ph<sub>3</sub>COH was employed to quantify (*p*-OMe-C<sub>6</sub>H<sub>4</sub>)<sub>3</sub>COH, except in this case, the starting radical was freshly prepared following a literature procedure,<sup>3</sup> as follows: An amount of (*p*-OMe-C<sub>6</sub>H<sub>4</sub>)<sub>3</sub>CCl (20.8 mg, 0.056 mmol) was dissolved in toluene-*d*<sub>8</sub> (1 mL) and excess Cu powder was added, and the heterogenous mixture was heated in the dark for 1 h at 75 °C. The resulting dark red solution was cooled to 23 °C, filtered through Celite, and an aliquot of this solution was then added to a solution of **3** or **4** in a 1:1 molar ratio. Integration of the singlet at 5.24 ppm, corresponding to the OH proton of (*p*-OMe-C<sub>6</sub>H<sub>4</sub>)<sub>3</sub>COH, gave an average yield (3 runs) for (*p*-OMe-C<sub>6</sub>H<sub>4</sub>)<sub>3</sub>COH of 88 ± 3% for **3** and 84 ± 3% for **4**.

**Quantification of (*p*-Cl-C<sub>6</sub>H<sub>4</sub>)<sub>3</sub>COH.** The same procedure as described for (*p*-OMe-C<sub>6</sub>H<sub>4</sub>)<sub>3</sub>COH was employed to quantify (*p*-Cl-C<sub>6</sub>H<sub>4</sub>)<sub>3</sub>COH. The starting radical was freshly prepared following a literature procedure,<sup>3</sup> as follows: An amount of (*p*-Cl-C<sub>6</sub>H<sub>4</sub>)<sub>3</sub>CBr (35 mg, 0.082 mmol) was dissolved in toluene-*d*<sub>8</sub> (1 mL) and excess Cu powder was added, and the heterogenous mixture was heated in the dark for 1 h at 75 °C. The resulting pink solution was cooled to 23 °C, filtered through Celite, and an aliquot of this solution was then added to a solution of **3** or **4** in a 1:10 molar ratio. Integration of the singlet at 5.91 ppm corresponding to the OH proton of (*p*-Cl-C<sub>6</sub>H<sub>4</sub>)<sub>3</sub>COH, gave an average yield (3 runs) for (*p*-Cl-C<sub>6</sub>H<sub>4</sub>)<sub>3</sub>COH of 87 ± 3% for **3** and 84 ± 3% for **4**.

**Quantification of (*p*-OMe-C<sub>6</sub>H<sub>4</sub>)<sub>3</sub>CCl.** Crystalline **5** (20 mg, 0.029 mmol) was dissolved in THF (5 mL, 5.78 mM). The radical (*p*-OMe-C<sub>6</sub>H<sub>4</sub>)<sub>3</sub>C• was freshly prepared according to a literature procedure,<sup>3</sup> as follows: an amount of (*p*-OMe-C<sub>6</sub>H<sub>4</sub>)<sub>3</sub>CCl (20.5 mg, 0.056 mmol) was dissolved in toluene (5 mL) and excess Cu powder was added, and the heterogenous mixture was heated in the dark for 1 h at 75 °C. The resulting dark red solution was cooled to 23 °C, filtered through Celite, and an aliquot of this solution (2 mL, 1 equiv) was added to the solution of **5**. The reaction was stirred for 4 h at 23 °C and then dried under vacuum, and the resulting solids were dissolved in ethyl acetate and filtered through a small plug of silica gel to remove impurities. The ethyl acetate was then removed under vacuum, and the crude solid was purified by silica gel column chromatography (9:1 hexane:EtOAc v/v) to give (*p*-OMe-C<sub>6</sub>H<sub>4</sub>)<sub>3</sub>CCl as an orange solid (9.5 mg, 90%) . <sup>1</sup>H NMR (CD<sub>2</sub>Cl<sub>2</sub>, 400MHz) δ 7.24 (d, 6H), 6.93 (d, 6H), 3.90 (s, 9H).

**Quantification of (*p*-Cl-C<sub>6</sub>H<sub>4</sub>)<sub>3</sub>CCl.** The same procedure as described for (*p*-OMe-C<sub>6</sub>H<sub>4</sub>)<sub>3</sub>CCl was employed to quantify (*p*-Cl-C<sub>6</sub>H<sub>4</sub>)<sub>3</sub>CCl. Purification by silica gel column chromatography (9:1 hexane:EtOAc v/v) gave (*p*-Cl-C<sub>6</sub>H<sub>4</sub>)<sub>3</sub>CCl as an orange solid (8.6 mg, 80%) . <sup>1</sup>H NMR (CD<sub>2</sub>Cl<sub>2</sub>, 400MHz) δ 7.30 – 7.17 (m, 12H).

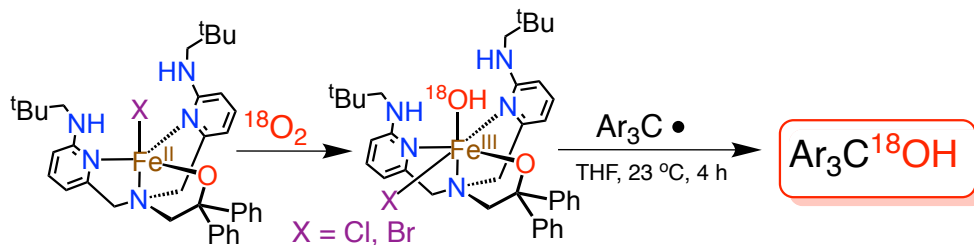

**<sup>18</sup>O labeling studies.** Crystalline **1** (5 mg, 0.007 mmol) was dissolved in THF (1 mL). Dry <sup>18</sup>O<sub>2</sub> (2 mL) was added via a gas-tight three way syringe, leading to a color change from yellow to orange that was consistent with the formation of **3**. The volatiles were removed under vacuum, the residue was dissolved in THF (1 mL) and (Ph<sub>3</sub>C)<sub>2</sub> (34 mg, 0.07 mmol) was added. The reaction was stirred for 4 h under light limiting conditions. A color change from orange to dark yellow was noted. The volatiles were removed under vacuum, and the crude reaction mixture was analyzed by electron ionization mass spectrometry (EI-MS). A peak at *m/z* 262.2 was observed, corresponding to Ph<sub>3</sub>C<sup>18</sup>OH. A control reaction with <sup>16</sup>O<sub>2</sub> carried out in an identical manner gave a peak at *m/z* 260.2, two mass units below the <sup>18</sup>O-labeled product. The same reaction was carried out between **4** and (*p*-Cl-C<sub>6</sub>H<sub>4</sub>)<sub>3</sub>C•. A peak at *m/z* 364 was observed, corresponding to (*p*-Cl-C<sub>6</sub>H<sub>4</sub>)<sub>3</sub>C<sup>18</sup>OH. A control reaction with <sup>16</sup>O<sub>2</sub> carried out in an identical manner gave a peak at *m/z* 362, two mass units below the <sup>18</sup>O-labeled product.

### Single Crystal X-ray Crystallography.

All reflection intensities were measured at 110(2) K using a SuperNova diffractometer (equipped with Atlas detector) with Mo *K*α radiation (λ = 0.71073 Å) under the program CrysAlisPro (Version CrysAlisPro 1.171.39.29c, Rigaku OD, 2017). The same program was used to refine the cell dimensions and for data reduction. The structures were solved with the program SHELXS-2018/3 (Sheldrick, 2018) and were refined on *F*<sup>2</sup> with SHELXL-2018/3 (Sheldrick, 2018). Numerical absorption correction based on gaussian integration over a multifaceted crystal model was applied using CrysAlisPro. The temperature of the data collection was controlled using the system Cryojet (manufactured by Oxford Instruments). The H atoms were placed at calculated positions (unless otherwise specified) using the instructions AFIX 23, AFIX 43 or AFIX 137 with isotropic displacement parameters having values 1.2 or 1.5 *U*<sub>eq</sub> of the attached C atoms.

**Refinement of 1.** The H atoms attached to N1 and N5 were found from difference Fourier maps, and their coordinates were refined pseudofreely using the DFIX instruction in order to keep the N–H bond distances within an acceptable range. The absolute configuration has been established by anomalous-dispersion effects in diffraction measurements on the crystal. The Flack and Hooft parameters refine to -0.014(4) and -0.012(1), respectively.

**Refinement of 2.** The H atoms attached to N1 and N5 were found from difference Fourier maps, and their coordinates were refined pseudofreely using the DFIX instruction in order to keep the N–H bond distances within acceptable ranges. The absolute configuration has been established by anomalous-dispersion effects in diffraction measurements on the crystal. The Flack and Hooft parameters refine to -0.008(2) and -0.001(4), respectively.

**Refinement of 3.** The H atoms attached to N1, N5 and O2 were found from difference Fourier maps, and their coordinates were refined pseudofreely using the DFIX instruction in order to keep the N–H and O–H bond distances within acceptable ranges. The C18 → C22 moiety is found to be disordered over two orientations, and the occupancy factor of the major component of the disorder refines to 0.730(4). There is also some small amount of substitutional disorder at the site O2–H/C12. The occupancy factor of the hydroxide (major component) refines to 0.942(3).

**Refinement of 4.** The H atoms attached to N1, N5 and O1 were found from difference Fourier maps, and their coordinates were refined pseudofreely using the DFIX instruction in order to keep the N–H and O–H bond distances within acceptable ranges. At the same coordination site occupied mostly by –OH<sup>-</sup>, a small Br<sup>-</sup> impurity is found, and its occupancy factor refines to 0.0114(8).

**Refinement of 5.** The H atoms attached to N1 and N5 were found from difference Fourier maps, and their coordinates were refined pseudofreely using the DFIX instruction in order to keep the N–H distance within an acceptable range. One of the two crystallographically independent THF solvent molecule is found to be disordered over two orientations, and the occupancy factor of the major component of the disorder refines to 0.585(16). The crystal was found to be pseudo-merohedrally twinned as the true *C* monoclinic unit cell

has a beta angle very close to  $90^\circ$  and emulates a *C* orthorhombic unit cell. The twinning was handled using the TWIN 1 0 0 0 -1 0 0 0 -1 instruction. Once the twinning was taken into account, the refinement had no further problems.



**A. Supporting Tables. Table S1.** Comparison of metrical parameters obtained from X-ray crystallography and DFT calculations for **1** and **2**.

| <b>Bond lengths</b> | <b>Complex 1 (X =Cl)</b>                    |                                             | <b>Complex 2 (X =Br)</b>                    |                                             |
|---------------------|---------------------------------------------|---------------------------------------------|---------------------------------------------|---------------------------------------------|
|                     | Bond lengths (Å) and bond angles (°) by XRD | Bond lengths (Å) and bond angles (°) by DFT | Bond lengths (Å) and bond angles (°) by XRD | Bond lengths (Å) and bond angles (°) by DFT |
| Fe1–N2              | 2.2268(16)                                  | 2.226                                       | 2.2392(19)                                  | 2.229                                       |
| Fe1–N3              | 2.2039(17)                                  | 2.243                                       | 2.197(2)                                    | 2.158                                       |
| Fe1–N4              | 2.1783(16)                                  | 2.152                                       | 2.186(2)                                    | 2.244                                       |
| Fe1–O1              | 1.9221(14)                                  | 1.888                                       | 1.9175(16)                                  | 1.891                                       |
| Fe1–X1              | 2.3972(5)                                   | 2.392                                       | 2.5570(4)                                   | 2.505                                       |
| N1–X1               | 3.2064(18)                                  | 3.157                                       | 3.360(2)                                    | 3.353                                       |
| N5–X1               | 3.2395(19)                                  | 3.378                                       | 3.366(2)                                    | 3.581                                       |
| <b>Bond Angles</b>  |                                             |                                             |                                             |                                             |
| N2–Fe1–N3           | 75.67(6)                                    | 75.69                                       | 75.85(7)                                    | 75.46                                       |
| N2–Fe1–N4           | 106.75(6)                                   | 101.9                                       | 108.02(7)                                   | 101.61                                      |
| N3–Fe1–N4           | 77.65(6)                                    | 77.92                                       | 77.17(7)                                    | 77.46                                       |
| N2–Fe1–O1           | 135.74(6)                                   | 140.97                                      | 135.01(7)                                   | 141.78                                      |
| N3–Fe1–O1           | 82.14(6)                                    | 80.53                                       | 82.18(7)                                    | 80.35                                       |
| N4–Fe1–O1           | 105.15(6)                                   | 102.81                                      | 104.56(7)                                   | 101.46                                      |
| O1–Fe1–X1           | 96.82(4)                                    | 99.11                                       | 95.64(5)                                    | 97.82                                       |
| X1–Fe1–N2           | 100.91(4)                                   | 97.82                                       | 101.54(5)                                   | 97.69                                       |
| X1–Fe1–N3           | 173.30(5)                                   | 167.63                                      | 173.12(5)                                   | 164.34                                      |
| X1–Fe1–N4           | 108.96(4)                                   | 114.02                                      | 109.72(5)                                   | 118.01                                      |
| N1–H1–X1            | 176(3)                                      | 167                                         | 166(3)                                      | 160                                         |
| N5–H5–X1            | 167(2)                                      | 162                                         | 166(3)                                      | 165                                         |

**Table S2.** Comparison of metrical parameters obtained from X-ray crystallography and DFT calculations for **3** and **4**.

| <b>Bond lengths</b> | <b>Complex 3 (X =Cl)</b>                    |                                             | <b>Complex 4 (X =Br)</b>                    |                                             |
|---------------------|---------------------------------------------|---------------------------------------------|---------------------------------------------|---------------------------------------------|
|                     | Bond lengths (Å) and bond angles (°) by XRD | Bond lengths (Å) and bond angles (°) by DFT | Bond lengths (Å) and bond angles (°) by XRD | Bond lengths (Å) and bond angles (°) by DFT |
| Fe1–N2              | 2.2674(17)                                  | 2.299                                       | 2.248(2)                                    | 2.295                                       |
| Fe1–N3              | 2.2649(17)                                  | 2.307                                       | 2.174(2)                                    | 2.235                                       |
| Fe1–N4              | 2.1757(17)                                  | 2.233                                       | 2.2581(19)                                  | 2.315                                       |
| Fe1–O1              | 1.9128(13)                                  | 1.877                                       | 1.9026(19)                                  | 1.876                                       |
| Fe1–X1              | 2.3945(6)                                   | 2.394                                       | 2.5835(4)                                   | 2.56                                        |
| Fe1–O2              | 1.903(2)                                    | 1.917                                       | 1.9008(16)                                  | 1.916                                       |
| N1–O2               | 2.703(3)                                    | 2.691                                       | 2.693(3)                                    | 2.695                                       |
| N5–O2               | 2.867(2)                                    | 2.822                                       | 2.861(3)                                    | 2.819                                       |
| <b>Bond angles</b>  |                                             |                                             |                                             |                                             |
| N2–Fe1–N3           | 78.77(6)                                    | 73.97                                       | 79.50(7)                                    | 78.19                                       |
| N2–Fe1–N4           | 88.52(6)                                    | 89.08                                       | 88.87(7)                                    | 89.1                                        |
| N3–Fe1–N4           | 73.63(6)                                    | 78.29                                       | 73.59(7)                                    | 73.98                                       |
| N2–Fe1–O1           | 88.91(6)                                    | 87.26                                       | 91.32(8)                                    | 87.49                                       |
| N3–Fe1–O1           | 81.41(6)                                    | 80.13                                       | 166.90(8)                                   | 153.9                                       |
| N4–Fe1–O1           | 153.93(6)                                   | 154.04                                      | 97.09(7)                                    | 79.99                                       |
| O1–Fe1–X1           | 93.32(4)                                    | 96.25                                       | 91.04(6)                                    | 96.14                                       |
| X1–Fe1–N4           | 97.19(7)                                    | 96.37                                       | 87.38(5)                                    | 85.6                                        |
| X1–Fe1–N2           | 175.38(5)                                   | 173.48                                      | 175.79(5)                                   | 174.1                                       |
| X1–Fe1–N3           | 97.55(5)                                    | 96.85                                       | 97.59(5)                                    | 97.83                                       |
| O2–Fe1–N4           | 87.74(4)                                    | 85.37                                       | 154.89(7)                                   | 165.51                                      |
| O2–Fe1–N2           | 91.03(8)                                    | 90.96                                       | 89.47(7)                                    | 90.94                                       |
| O2–Fe1–N3           | 166.28(7)                                   | 165.48                                      | 81.47(7)                                    | 96.53                                       |
| O2–Fe1–X1           | 92.15(6)                                    | 93.04                                       | 93.12(5)                                    | 92.23                                       |
| O2–Fe1–O1           | 107.79(7)                                   | 109.38                                      | 108.00(7)                                   | 109.38                                      |

|          |        |     |        |     |
|----------|--------|-----|--------|-----|
| N1-H1-O2 | 161(3) | 163 | 156(3) | 164 |
| N5-H5-O2 | 162(3) | 163 | 162(3) | 163 |

**Table S3.** Comparison of metrical parameters obtained from X-ray crystallography and DFT calculations for **5**.

|                     | Bond lengths (Å) and bond angles (°) by XRD | Bond lengths (Å) and bond angle (°) by DFT |
|---------------------|---------------------------------------------|--------------------------------------------|
| <b>Bond lengths</b> |                                             |                                            |
| Fe1–N2              | 2.2582(16)                                  | 2.302                                      |
| Fe1–N3              | 2.1518(17)                                  | 2.229                                      |
| Fe1–N4              | 2.2152(16)                                  | 2.335                                      |
| Fe1–O1              | 1.8659(14)                                  | 1.864                                      |
| Fe1–Cl2             | 2.3665(5)                                   | 2.349                                      |
| Fe1–Cl1             | 2.3360(5)                                   | 2.351                                      |
| N1–Cl1              | 3.2012(19)                                  | 3.274                                      |
| N5–Cl1              | 3.1582(19)                                  | 3.298                                      |
| <b>Bond angles</b>  |                                             |                                            |
| N2–Fe1–N3           | 74.10(6)                                    | 75.36                                      |
| N2–Fe1–N4           | 152.77(6)                                   | 152.44                                     |
| N3–Fe1–N4           | 78.74(6)                                    | 77.26                                      |
| N2–Fe1–O1           | 90.30(6)                                    | 89.94                                      |
| N3–Fe1–O1           | 83.11(6)                                    | 79.94                                      |
| N4–Fe1–O1           | 84.54(6)                                    | 88.32                                      |
| O1–Fe1–Cl2          | 170.87(5)                                   | 169.79                                     |
| Cl2–Fe1–N4          | 88.93(6)                                    | 87.77                                      |
| Cl2–Fe1–N2          | 92.76(5)                                    | 89.17                                      |
| Cl2–Fe1–N3          | 89.46(5)                                    | 90.00                                      |

|             |           |        |
|-------------|-----------|--------|
| Cl1-Fe1-N4  | 106.85(6) | 104.84 |
| Cl1-Fe1-N2  | 100.62(4) | 102.72 |
| Cl1-Fe1-N3  | 174.72(5) | 173.56 |
| Cl1-Fe1-Cl2 | 91.14(2)  | 96.14  |
| O2-Fe1-O1   | 96.75(5)  | 93.98  |
| N1-H1-Cl1   | 154(2)    | 169    |
| N5-H5-Cl1   | 174(3)    | 169    |

**Table S4.** DFT optimized coordinates for **1**.

|    |                  |                  |                  |
|----|------------------|------------------|------------------|
| Fe | 4.88220013651211 | 0.82037094245890 | 4.43625132917522 |
| C  | 8.20349398774879 | 3.75999998173240 | 6.79044710942307 |
| H  | 7.80446052528327 | 4.76709115866820 | 6.57126058392618 |
| H  | 7.90789016929889 | 3.08406004151019 | 5.97023102048449 |

|   |                  |                   |                   |
|---|------------------|-------------------|-------------------|
| H | 9.30633435786916 | 3.82224289070050  | 6.78254502747175  |
| C | 8.25827363048332 | 1.83360835719877  | 8.43711595506970  |
| H | 9.36304527304828 | 1.84804490086792  | 8.46169424745281  |
| H | 7.95536049028402 | 1.12168128736922  | 7.65032302850874  |
| H | 7.90227116630679 | 1.45322413829648  | 9.41253331147951  |
| C | 8.21272408137677 | 4.21088134934404  | 9.27069810112009  |
| H | 7.88704310037428 | 3.87834805812404  | 10.27376664806182 |
| H | 7.84047357083742 | 5.24002477836924  | 9.11513804363693  |
| H | 9.31663534945395 | 4.25038557371412  | 9.27158231229073  |
| C | 7.71296085840541 | 3.25287212557849  | 8.16565178099279  |
| C | 6.16552441369125 | 3.26839050045200  | 8.23541179958057  |
| H | 5.85440714165851 | 2.94611756923056  | 9.25150851376560  |
| H | 5.81861242723959 | 4.31588775332415  | 8.10778975243905  |
| C | 4.16268154329241 | 2.41620327902451  | 7.05354311364197  |
| C | 3.28201721730479 | 3.12053233186772  | 7.92828963057904  |
| C | 1.91994809490457 | 3.12084900082646  | 7.65951263034888  |
| C | 1.42788207212268 | 2.43121920440256  | 6.53557107129220  |
| H | 0.36390243257596 | 2.43270010822228  | 6.28339575689967  |
| C | 2.34008035350933 | 1.73472511549037  | 5.74032554832607  |
| C | 1.86280908811602 | 0.92065123691517  | 4.54965719818217  |
| H | 1.70913138468772 | -0.12512172538692 | 4.87432433326211  |
| H | 0.87710066695134 | 1.29582242631302  | 4.20198222643032  |
| C | 2.82361684056173 | -0.32588857744839 | 2.66608520775703  |
| H | 3.55510230419011 | -0.20690920247069 | 1.84711147294060  |
| H | 1.82857086653258 | -0.49394143513796 | 2.19822323020152  |
| C | 3.20232453532013 | -1.51824651339447 | 3.52034448729916  |
| C | 2.58368916597294 | -2.75441264142976 | 3.33476896528859  |
| H | 1.80323291117823 | -2.86931416552844 | 2.57753714621889  |
| C | 2.98901214680889 | -3.82916694883229 | 4.14857695763328  |
| C | 3.96684288563027 | -3.62776704757594 | 5.11321130590753  |
| C | 4.56122392284496 | -2.33946828249130 | 5.25214479466340  |
| C | 6.24268847126359 | -3.04229904065831 | 6.99167324006387  |
| H | 7.31348274343213 | -2.77074179430712 | 6.93507471431738  |
| H | 6.15195937696556 | -4.04771813918286 | 6.54008102794474  |
| C | 5.82283670677672 | -3.09623051622690 | 8.49089551339497  |
| C | 6.02919774805895 | -1.70868602958057 | 9.13328670733118  |
| H | 7.08833575518669 | -1.39685942568784 | 9.08157314560919  |
| H | 5.73314383590845 | -1.72281913071856 | 10.19737334724977 |
| H | 5.42475536737757 | -0.93980435395076 | 8.62094150699760  |
| C | 6.72584417527195 | -4.13551776716439 | 9.18850441984402  |
| H | 6.60526636173169 | -5.14050548302170 | 8.74267580032641  |
| H | 6.47453675333096 | -4.21469674108859 | 10.26136046438583 |
| H | 7.79317625463629 | -3.85721030664574 | 9.11340596614206  |
| C | 4.34550912215544 | -3.51696336901649 | 8.62477157434543  |
| H | 3.68011417261104 | -2.81954800257617 | 8.08704723300399  |
| H | 4.03885071235354 | -3.52668866875549 | 9.68617942274078  |

|    |                  |                   |                   |
|----|------------------|-------------------|-------------------|
| H  | 4.17669334096087 | -4.53279265553617 | 8.22268709616976  |
| C  | 2.85652019478948 | 2.15618843145031  | 2.66759482817562  |
| H  | 2.52975208543806 | 2.96494286371404  | 3.34150578776153  |
| H  | 2.12107802264061 | 2.08476162200385  | 1.83893607760342  |
| C  | 4.30971498865361 | 2.52231915917599  | 2.19005866806352  |
| C  | 4.36459133606780 | 4.02791867997668  | 1.82768865988876  |
| C  | 5.54778115788760 | 4.73650520962495  | 2.11186779612961  |
| H  | 6.36294366064059 | 4.19741081916842  | 2.60252205961666  |
| C  | 5.66413202328751 | 6.09526901723149  | 1.78805043833641  |
| H  | 6.59434546252458 | 6.62854175688609  | 2.01576620540933  |
| C  | 4.59530360552484 | 6.77530045789025  | 1.18073272013039  |
| H  | 4.68615009264560 | 7.83728620697405  | 0.92804553599839  |
| C  | 3.40856572384307 | 6.08167444511130  | 0.90208009309803  |
| H  | 2.56301529560921 | 6.60055348431083  | 0.43614366728447  |
| C  | 3.29587651710512 | 4.71848322086818  | 1.22175834313417  |
| H  | 2.35629876302093 | 4.20116209979814  | 0.99416186797388  |
| C  | 4.72392128079313 | 1.71261719830894  | 0.92454667603897  |
| C  | 3.96848617313450 | 1.73328389726736  | -0.26713040214194 |
| C  | 4.37280940102285 | 0.99326741064069  | -1.38831056561582 |
| H  | 3.77147720335116 | 1.02354489834400  | -2.30424256224506 |
| C  | 5.54804589457451 | 0.22512669945351  | -1.34184709043776 |
| H  | 5.86659318138542 | -0.34840275510768 | -2.21913572645486 |
| C  | 6.31319646218910 | 0.20828745506595  | -0.16560967670335 |
| H  | 7.23771335475530 | -0.37770118875218 | -0.11905707093822 |
| C  | 5.90473173008911 | 0.94567204160187  | 0.95821033611271  |
| H  | 6.49767238052869 | 0.94642799323859  | 1.87787195921641  |
| N  | 5.50814041272250 | 2.42287432877285  | 7.24144548214043  |
| H  | 6.07391734595418 | 1.93527791342664  | 6.53073955691977  |
| N  | 3.67649000981902 | 1.70496713063753  | 5.98407080900975  |
| N  | 2.86246276816666 | 0.90814054232887  | 3.46554014817570  |
| N  | 4.17256062828850 | -1.28923141152402 | 4.45073081013488  |
| N  | 5.51976055084409 | -2.06575011953385 | 6.18231482768425  |
| H  | 6.01776309687543 | -1.17550295807398 | 6.01940463273765  |
| O  | 5.16866220432051 | 2.26335214745032  | 3.25266153339953  |
| Cl | 7.14751500586600 | 0.40622244810881  | 5.08347878004568  |
| H  | 2.52820751130775 | -4.81601528343841 | 4.03595537880749  |
| H  | 4.27045495111190 | -4.44123098797994 | 5.77351617427855  |
| H  | 1.23570618513657 | 3.66806201927111  | 8.31662899341075  |
| H  | 3.68220225742684 | 3.65830908124416  | 8.78958735430147  |
| H  | 3.06205107025976 | 2.34569787887686  | -0.33150792809957 |

**Table S5.** DFT optimized coordinates for **2**.

|    |                  |                  |                  |
|----|------------------|------------------|------------------|
| Fe | 4.75096045465756 | 0.70746173432551 | 4.46128682825637 |
| C  | 7.96091217071853 | 3.62305657005287 | 6.92398669813465 |
| H  | 7.55173125171441 | 4.61517315962448 | 6.66053116695447 |
| H  | 7.71017916813169 | 2.91885362589463 | 6.11210325619647 |

|   |                  |                   |                   |
|---|------------------|-------------------|-------------------|
| H | 9.06188220147069 | 3.70646047130896  | 6.95641773189989  |
| C | 7.98199766795735 | 1.74460166853387  | 8.62798237206040  |
| H | 9.08549520391646 | 1.77342509510636  | 8.67719923845509  |
| H | 7.70612320973289 | 1.00021655240014  | 7.86183548855099  |
| H | 7.60762510822762 | 1.39393930800361  | 9.60748363108462  |
| C | 7.87330555480461 | 4.14339320600188  | 9.38779363280044  |
| H | 7.50507761741343 | 3.84206265451727  | 10.38603889940505 |
| H | 7.50315790042265 | 5.16445437756065  | 9.18174910292409  |
| H | 8.97583544784560 | 4.18969825165647  | 9.43648436756064  |
| C | 7.42717726817102 | 3.14624929381574  | 8.29367482470048  |
| C | 5.87873547518003 | 3.14259130295546  | 8.30879179513243  |
| H | 5.53802559049511 | 2.83360595286102  | 9.31897018368392  |
| H | 5.52372983424332 | 4.18362244810325  | 8.15219259509007  |
| C | 3.92280744619303 | 2.28818427148655  | 7.05972487359056  |
| C | 3.01181903712661 | 2.98427826387424  | 7.90904981711877  |
| C | 1.66452068262393 | 3.01373076819082  | 7.57439067393543  |
| C | 1.21894033802793 | 2.36616922106924  | 6.40738762037979  |
| H | 0.17029176100329 | 2.39757795008564  | 6.09958678121616  |
| C | 2.15861579459241 | 1.67475326315962  | 5.63958252669731  |
| C | 1.73242638745208 | 0.91786995946799  | 4.39362269850680  |
| H | 1.52896220347088 | -0.13343990823556 | 4.66848785346848  |
| H | 0.78193511292941 | 1.33500748199324  | 3.99945454269666  |
| C | 2.77606794164407 | -0.27896324964797 | 2.52112787206626  |
| H | 3.56945059608488 | -0.15765165401845 | 1.76196198863465  |
| H | 1.81331065761325 | -0.38935931324646 | 1.97447283885703  |
| C | 3.04111752652230 | -1.51779360738841 | 3.35257436033552  |
| C | 2.38141752154190 | -2.71460055902532 | 3.06926500815295  |
| H | 1.66458296840712 | -2.76244322026983 | 2.24474357464606  |
| C | 2.67297853444835 | -3.83910859416370 | 3.86159256328832  |
| C | 3.57378813604984 | -3.71744324136662 | 4.91111225224224  |
| C | 4.19324860688609 | -2.45792007267162 | 5.16645391117923  |
| C | 5.37032649432988 | -3.38403370566190 | 7.13249305041409  |
| H | 5.90789633879590 | -4.19448211081918 | 6.59168096889485  |
| H | 4.41917065708981 | -3.81613852647439 | 7.50031955278392  |
| C | 6.21816656754802 | -2.96399613113762 | 8.36068339420686  |
| C | 7.64797776111873 | -2.56984842220859 | 7.92967388236215  |
| H | 8.14923306841633 | -3.40808813920155 | 7.41098803100516  |
| H | 8.25673250873687 | -2.30745192120316 | 8.81337458495326  |
| H | 7.65523512927142 | -1.70122464425350 | 7.24798460539040  |
| C | 6.29383396512511 | -4.19747503165078 | 9.28950887460261  |
| H | 5.29382308495606 | -4.48770676698321 | 9.66093727228776  |
| H | 6.92849734090981 | -3.98085642337410 | 10.16662493993957 |
| H | 6.73076778936748 | -5.06990304241621 | 8.76966268471535  |
| C | 5.54208176590448 | -1.79982967575763 | 9.11504773710120  |
| H | 5.49346195026372 | -0.88473953407169 | 8.50101267981637  |
| H | 6.10738724626382 | -1.55785613030766 | 10.03293498642550 |



|    |                  |                   |                   |
|----|------------------|-------------------|-------------------|
| H  | 4.51111303405305 | -2.06394689256276 | 9.41223964132113  |
| C  | 2.88388526309821 | 2.20055390551102  | 2.63991207610345  |
| H  | 2.54727573040610 | 2.98783253491436  | 3.33395834811553  |
| H  | 2.19457766715731 | 2.19617798762868  | 1.76987040513594  |
| C  | 4.37397211663267 | 2.53343733714467  | 2.26653896977816  |
| C  | 4.50514873481522 | 4.05106213159680  | 1.98221495412944  |
| C  | 5.69817807146129 | 4.69613658434029  | 2.36055631158182  |
| H  | 6.46492632923025 | 4.10137071879377  | 2.86462247560689  |
| C  | 5.88416989020993 | 6.06277527518543  | 2.11063432656624  |
| H  | 6.82153067880115 | 6.54518812116195  | 2.41045054611398  |
| C  | 4.87588478522650 | 6.81437669350939  | 1.48461366876430  |
| H  | 5.02097524593495 | 7.88261402266565  | 1.28955508793003  |
| C  | 3.67954005498567 | 6.18416300629191  | 1.11224591746793  |
| H  | 2.87998437776583 | 6.75932443830721  | 0.63131585548319  |
| C  | 3.49765000810403 | 4.81288234527805  | 1.35722592236754  |
| H  | 2.55200595426192 | 4.34656519049019  | 1.05741049718283  |
| C  | 4.83665828150460 | 1.77091478728393  | 0.98858445670148  |
| C  | 4.14974574942286 | 1.87006614843569  | -0.23989890762372 |
| C  | 4.59921866941569 | 1.17663374519676  | -1.37347690950126 |
| H  | 4.05132020462475 | 1.26830711136426  | -2.31827948249246 |
| C  | 5.75210660596101 | 0.37716899885627  | -1.30197164852931 |
| H  | 6.10612733954317 | -0.15966343187902 | -2.18872429860688 |
| C  | 6.44892639608506 | 0.28150175790130  | -0.08779494135441 |
| H  | 7.35548857783885 | -0.32995919774521 | -0.02014284782845 |
| C  | 5.99530767615322 | 0.97240947192028  | 1.04805063037126  |
| H  | 6.53500798850487 | 0.91000884984318  | 1.99796674760053  |
| N  | 5.26010567593392 | 2.27271784167273  | 7.30922862667635  |
| H  | 5.84551256537264 | 1.81554482627186  | 6.59394613307138  |
| N  | 3.47888185491610 | 1.60970863947115  | 5.95307948690579  |
| N  | 2.79917879706459 | 0.91725170333480  | 3.37490751208874  |
| N  | 3.93528743551173 | -1.36515316811848 | 4.37046229152108  |
| N  | 5.03763195321208 | -2.28747001991584 | 6.22488052279112  |
| H  | 5.70591437990013 | -1.50388844716382 | 6.13432450663075  |
| O  | 5.15666921767935 | 2.19345380556528  | 3.36514836348812  |
| Br | 7.09561699232420 | 0.11679202502481  | 5.11607290459982  |
| H  | 2.19536796500730 | -4.80311196481398 | 3.65818996817454  |
| H  | 3.82335537725439 | -4.58002629658878 | 5.53085457994119  |
| H  | 0.95681454837855 | 3.55375749577014  | 8.21226802369579  |
| H  | 3.37683097256530 | 3.49169423315359  | 8.80348080564053  |
| H  | 3.26317278786378 | 2.50895445840811  | -0.32370234241176 |

**Table S6.** DFT optimized coordinates for **3**.

|    |                  |                   |                  |
|----|------------------|-------------------|------------------|
| Fe | 6.88754495677967 | 12.76021691007227 | 4.32700089739328 |
| Cl | 8.79039223156907 | 12.26549291641061 | 2.96035363969664 |
| O  | 5.92472791917811 | 11.21581224898221 | 3.72393034498958 |
| H  | 6.49538188216198 | 10.49190231209836 | 3.43305357388292 |

|   |                  |                   |                   |
|---|------------------|-------------------|-------------------|
| C | 4.58077114944614 | 8.66408469643328  | 6.30789586558758  |
| H | 5.42486069987048 | 9.35822000917382  | 6.22487671451054  |
| H | 4.41856258085149 | 8.21031757416273  | 5.32118881230963  |
| H | 4.87159206633113 | 7.86247599200367  | 6.99780133864809  |
| C | 2.15271795093296 | 8.36440596076221  | 6.90191494847957  |
| H | 2.39439081510301 | 7.56327576017975  | 7.61023540354079  |
| H | 1.94813556253941 | 7.89835197756542  | 5.92935894390177  |
| H | 1.22611155074605 | 8.84256253644579  | 7.24548685830141  |
| C | 3.57012019566417 | 9.99209594941273  | 8.19415672804861  |
| H | 4.36102929544746 | 10.74930893699329 | 8.15195023114723  |
| H | 3.88173544633714 | 9.21818827096299  | 8.90680710605125  |
| H | 2.66628012532438 | 10.46746112160365 | 8.59709574462318  |
| C | 3.31010188220254 | 9.37718079046408  | 6.80778172824740  |
| C | 2.88567835158662 | 10.47299028701983 | 5.78844223454367  |
| H | 2.62357862674011 | 9.97534990264481  | 4.84583603675244  |
| H | 1.97026539261157 | 10.96274157445384 | 6.13732769485627  |
| C | 4.00129656104719 | 12.72329857318852 | 5.97017108924847  |
| C | 3.07116449953602 | 13.26077576308958 | 6.89865368082457  |
| H | 2.23348862914650 | 12.66411455546390 | 7.23498796899977  |
| C | 3.26354271512766 | 14.53397897067281 | 7.39221686658866  |
| H | 2.56287148471947 | 14.94549018499695 | 8.11466097057302  |
| C | 4.37049397565444 | 15.28038566476395 | 6.97801626933838  |
| H | 4.56717328017826 | 16.27065100767014 | 7.37317943608959  |
| C | 5.23187140579534 | 14.70714867207931 | 6.05155590956503  |
| C | 6.38208464384481 | 15.55188086011672 | 5.53447501529482  |
| H | 5.97088307326517 | 16.21404765504636 | 4.76315009849450  |
| H | 6.74471393768938 | 16.19843718833684 | 6.34292086141387  |
| C | 7.94926802614353 | 15.49325710737932 | 3.68457621948602  |
| H | 8.87363106921283 | 15.01401469721960 | 3.34738596504443  |
| H | 8.15756140734424 | 16.55952100957357 | 3.85758660867599  |
| C | 6.90729877690142 | 15.32261419222608 | 2.60119987178346  |
| C | 6.71597189061717 | 16.30463176331735 | 1.64043604175420  |
| H | 7.26181322230069 | 17.24061819615777 | 1.69221023446595  |
| C | 5.82158009357376 | 16.02971213989145 | 0.59777842966526  |
| H | 5.65073752685156 | 16.76290632021257 | -0.18679180924391 |
| C | 5.16012829645620 | 14.81967508346802 | 0.56012605293493  |
| H | 4.48470863280955 | 14.58989975204734 | -0.25342404171259 |
| C | 5.37860865208105 | 13.86854502443054 | 1.59648325674055  |
| C | 3.90716846407179 | 12.21812185583057 | 0.51382430125392  |
| H | 4.52030733605985 | 12.08041116913393 | -0.39248686584099 |
| H | 3.17016710188367 | 12.99920921303715 | 0.28420094777033  |
| C | 3.13052527929662 | 10.91076854300909 | 0.79410779848970  |
| C | 2.32016172033144 | 10.58885691852765 | -0.47827785964931 |
| H | 1.73781289858946 | 9.67040849379582  | -0.33943422450456 |
| H | 2.97765910131720 | 10.43893058419160 | -1.34400741835850 |
| H | 1.61712002306936 | 11.39546025928041 | -0.72256353622414 |
| C | 2.16397700272720 | 11.11106050686702 | 1.97646019156614  |
| H | 2.69748275290584 | 11.39638517647298 | 2.88839137231522  |
| H | 1.60756521881655 | 10.18696378541326 | 2.17898567711487  |
| H | 1.43280848188269 | 11.89913486425062 | 1.75627602602365  |
| C | 4.09262939638082 | 9.74080473497722  | 1.08187369118320  |

|   |                   |                   |                   |
|---|-------------------|-------------------|-------------------|
| H | 4.65429735872851  | 9.89145864181249  | 2.00923958277674  |
| H | 4.81259796829652  | 9.60841433289625  | 0.26416457313870  |
| H | 3.52892534001239  | 8.80503731879338  | 1.18460044965952  |
| C | 8.66187531206854  | 14.55340215539545 | 5.84291271207153  |
| H | 8.93152478565807  | 15.45809742287535 | 6.40276769058526  |
| H | 9.50714214178174  | 14.29350424005088 | 5.20344660093251  |
| C | 8.40441242061829  | 13.30607811040047 | 6.75289593386173  |
| C | 7.60992254911909  | 13.60707893313731 | 8.04452234158683  |
| C | 6.84441165804895  | 12.57249312758019 | 8.60318487646063  |
| H | 6.79564632476561  | 11.62649976307463 | 8.07433408304373  |
| C | 6.16421792450320  | 12.75111128725286 | 9.80670906521035  |
| H | 5.58169478175647  | 11.93141391979338 | 10.22093991368380 |
| C | 6.23220942563626  | 13.97260590435794 | 10.48317865007569 |
| H | 5.70462125863507  | 14.11083538486879 | 11.42325937524835 |
| C | 6.99247563374850  | 15.00858459489681 | 9.94272546522527  |
| H | 7.06204989990653  | 15.96327731759371 | 10.45944587332298 |
| C | 7.67683245206910  | 14.82477155215918 | 8.73640791166384  |
| H | 8.27272668613669  | 15.64816870003496 | 8.35155793843373  |
| C | 9.79683724494645  | 12.73827202616534 | 7.14158339107457  |
| C | 10.58226480171808 | 13.31652219634840 | 8.14874852368340  |
| H | 10.19982312553127 | 14.15172877941808 | 8.72805936129460  |
| C | 11.85256566664384 | 12.81481907495712 | 8.44013517024323  |
| H | 12.44357897582085 | 13.27487721940765 | 9.22884032467243  |
| C | 12.35546770616612 | 11.72201442306170 | 7.73213184025761  |
| H | 13.34166763420539 | 11.32692622294579 | 7.96237797767469  |
| C | 11.57887250743276 | 11.14117159442800 | 6.72772438093236  |
| H | 11.95951829855198 | 10.29074607224401 | 6.16725898543514  |
| C | 10.31135523510379 | 11.64580734680775 | 6.43140399636299  |
| H | 9.71284029672669  | 11.20432689069697 | 5.64333354705386  |
| N | 3.89517319287453  | 11.46875791923969 | 5.47201864997754  |
| H | 4.63462234962517  | 11.19017328205403 | 4.80583516944274  |
| N | 5.05854847837235  | 13.47629416163924 | 5.53645052011058  |
| N | 7.51756310267570  | 14.81674087260844 | 4.92658938634135  |
| N | 6.24724236543878  | 14.14700141062869 | 2.60835726313597  |
| N | 4.73976100666890  | 12.67515065442680 | 1.61924272189356  |
| H | 5.08918979387384  | 11.99630151431698 | 2.31220964746201  |
| O | 7.71138903708166  | 12.37827941764994 | 5.97021616329377  |

**Table S7.** DFT optimized coordinates for **4**.

|    |                  |                   |                  |
|----|------------------|-------------------|------------------|
| Fe | 6.87771314640161 | 12.76692493506602 | 4.32502144048586 |
| Br | 8.89100848469648 | 12.20443383760142 | 2.84792898757110 |
| O  | 5.91277275223139 | 11.22363261824588 | 3.72650652551907 |
| H  | 6.48304372079389 | 10.49630742586072 | 3.44361376624901 |

|   |                  |                   |                   |
|---|------------------|-------------------|-------------------|
| C | 4.55351761725205 | 8.67091118188737  | 6.30203812012957  |
| H | 5.40075490721628 | 9.36132905002443  | 6.22029399018878  |
| H | 4.38755678303099 | 8.22179200199315  | 5.31385465511890  |
| H | 4.84166314903296 | 7.86526131647254  | 6.98836496231073  |
| C | 2.12586925793288 | 8.38021304830149  | 6.90124099898811  |
| H | 2.36582219513219 | 7.57639848356432  | 7.60711348002427  |
| H | 1.91697398408234 | 7.91728612070587  | 5.92810887297559  |
| H | 1.20204736684025 | 8.86138602211180  | 7.24811133313134  |
| C | 3.55344621613447 | 9.99808550090934  | 8.19436061481763  |
| H | 4.34638957598152 | 10.75318541116371 | 8.15257696865296  |
| H | 3.86486303982293 | 9.22092926544872  | 8.90358796946211  |
| H | 2.65222279709740 | 10.47467468901249 | 8.60166235217569  |
| C | 3.28732515849445 | 9.38828609665737  | 6.80685328899983  |
| C | 2.86469833060204 | 10.48811004220194 | 5.79097903282633  |
| H | 2.59857242487772 | 9.99337902713744  | 4.84806907252890  |
| H | 1.95176224704713 | 10.98036507788855 | 6.14299650542997  |
| C | 3.99097696846377 | 12.73174203617845 | 5.98104120089370  |
| C | 3.06864414007544 | 13.26555852667951 | 6.91945452046401  |
| H | 2.23024194842005 | 12.67015286109469 | 7.25617152408658  |
| C | 3.26990490916534 | 14.53354189081706 | 7.42288096778617  |
| H | 2.57545710565314 | 14.94163736781607 | 8.15325568249087  |
| C | 4.37752573281726 | 15.27887807418996 | 7.00841819979029  |
| H | 4.58092987404182 | 16.26492225118248 | 7.41052693669329  |
| C | 5.22990540837921 | 14.70980556632150 | 6.07115043027546  |
| C | 6.37726915472133 | 15.55537851731412 | 5.54977407623536  |
| H | 5.96050477948842 | 16.21980277096092 | 4.78342340467910  |
| H | 6.74528404001064 | 16.19933967400167 | 6.35783126774488  |
| C | 7.93073738418835 | 15.50998697524925 | 3.69103654625495  |
| H | 8.85513879013077 | 15.03695995819900 | 3.34441224518096  |
| H | 8.13436792060846 | 16.57636540403212 | 3.86880386505082  |
| C | 6.88364115479926 | 15.33890602203079 | 2.61330007660393  |
| C | 6.67983263999029 | 16.32595235106090 | 1.66063470028263  |
| H | 7.21806644999056 | 17.26600378227233 | 1.71719607479238  |
| C | 5.78331675306566 | 16.05102690111746 | 0.61972049066517  |
| H | 5.60236504793899 | 16.78853718741188 | -0.15850731069741 |
| C | 5.13303252072998 | 14.83535056191413 | 0.57587982566217  |
| H | 4.45534053698881 | 14.60574497586219 | -0.23583601147723 |
| C | 5.36458603721603 | 13.87794283848397 | 1.60366157362905  |
| C | 3.90945788100894 | 12.22202240725921 | 0.50802277684205  |
| H | 4.52328302917412 | 12.10605648610840 | -0.40077228415312 |
| H | 3.15907955765694 | 12.99365515376071 | 0.28942005400415  |
| C | 3.15681256948003 | 10.89766203736453 | 0.77288133616059  |
| C | 2.35271760978680 | 10.57576887631128 | -0.50345313706437 |
| H | 1.78416446996398 | 9.64735496424500  | -0.37396300454715 |
| H | 3.01314362003354 | 10.44394638117254 | -1.36993008886445 |
| H | 1.63774360006617 | 11.37391859006699 | -0.74078054820162 |
| C | 2.18665430307664 | 11.06578602205171 | 1.95702885590866  |
| H | 2.71416244912069 | 11.35347167250232 | 2.87168499080654  |
| H | 1.65028566966594 | 10.12807298583133 | 2.15077617271679  |
| H | 1.43851897281219 | 11.84004972501213 | 1.74491312475496  |
| C | 4.14061554560385 | 9.74268296866433  | 1.04739080874891  |

|   |                   |                   |                   |
|---|-------------------|-------------------|-------------------|
| H | 4.69538116242357  | 9.89121977833884  | 1.97923452069766  |
| H | 4.86653642137146  | 9.63677925379824  | 0.23104749421873  |
| H | 3.59542368102485  | 8.79452117057504  | 1.13458030154261  |
| C | 8.66006651939147  | 14.55885203490846 | 5.83866505058982  |
| H | 8.93016400593444  | 15.46158779535702 | 6.40140811585804  |
| H | 9.50212701976157  | 14.30323682974140 | 5.19330034666049  |
| C | 8.40882971025384  | 13.30766588490879 | 6.74326752871287  |
| C | 7.62166530979628  | 13.59944518393148 | 8.04226597593907  |
| C | 6.86464416168532  | 12.55862429005025 | 8.60096462721609  |
| H | 6.81512324644752  | 11.61514944187298 | 8.06768347450284  |
| C | 6.19351821853571  | 12.72761340138840 | 9.81098298249835  |
| H | 5.61750767328904  | 11.90314432001203 | 10.22491481513337 |
| C | 6.26244484551116  | 13.94524427566356 | 10.49413777830278 |
| H | 5.74199639384066  | 14.07588985884663 | 11.43923995083151 |
| C | 7.01434431182406  | 14.98723401508570 | 9.95348344726025  |
| H | 7.08423527617695  | 15.93929785364669 | 10.47500551825938 |
| C | 7.68947469647394  | 14.81333945061280 | 8.74067588869937  |
| H | 8.27699080058669  | 15.64249115299335 | 8.35533462885095  |
| C | 9.80088038994254  | 12.74082748177247 | 7.13175430948244  |
| C | 10.63042576077355 | 13.39080262283481 | 8.05702921324392  |
| H | 10.28535747306756 | 14.28608788802799 | 8.56578798905332  |
| C | 11.89740652491384 | 12.88695571154994 | 8.35673812107352  |
| H | 12.52458703308868 | 13.40452005247538 | 9.07915496683148  |
| C | 12.35233091909934 | 11.71927391501904 | 7.74098134958180  |
| H | 13.33659600868381 | 11.32326427348770 | 7.97775614225136  |
| C | 11.53087839770067 | 11.06585156156996 | 6.82098975351604  |
| H | 11.87396540551764 | 10.15698266925619 | 6.33310558872445  |
| C | 10.26625634422568 | 11.57334410793116 | 6.51515186386260  |
| H | 9.63160826642519  | 11.07729003627540 | 5.79047610176546  |
| N | 3.87620931463921  | 11.48168063218868 | 5.47335593973199  |
| H | 4.61265030594027  | 11.20336403386849 | 4.80416395714488  |
| N | 5.04805759607416  | 13.48432033835393 | 5.54668808147090  |
| N | 7.50976347431676  | 14.82372482568638 | 4.93076643236796  |
| N | 6.23505220418459  | 14.15631597501290 | 2.61478125899638  |
| N | 4.73755792437404  | 12.67858554551088 | 1.61717021869733  |
| H | 5.08987937033500  | 11.99900937999381 | 2.30790456290761  |
| O | 7.71443210333452  | 12.38284704065770 | 5.95949942173752  |

**Table S8.** DFT optimized coordinates for **5**.

|    |                  |                  |                  |
|----|------------------|------------------|------------------|
| Fe | 3.56294190214156 | 0.66339315666692 | 5.65040185552056 |
| C  | 7.72847252982326 | 3.29578800805572 | 8.01868365539914 |
| H  | 8.04744585220266 | 4.07810311889531 | 7.31811590895767 |
| H  | 7.33641112817835 | 2.45569970734976 | 7.43728547776699 |

|   |                  |                   |                   |
|---|------------------|-------------------|-------------------|
| H | 8.61943391719767 | 2.93854802600120  | 8.54926339975260  |
| C | 6.24264894203079 | 2.73049758003613  | 9.99164359105106  |
| H | 7.10159528422882 | 2.35773937226451  | 10.56254359140445 |
| H | 5.80186732517806 | 1.87554188075912  | 9.47028786467552  |
| H | 5.50253625421798 | 3.10875977906493  | 10.70876685690533 |
| C | 7.33959188167912 | 4.98364178884947  | 9.83736354391005  |
| H | 6.63505317112658 | 5.40724264787610  | 10.56490368401400 |
| H | 7.68642269653336 | 5.79707722559973  | 9.18742269316202  |
| H | 8.20674632337468 | 4.61026569202140  | 10.39404236149971 |
| C | 6.69489341966408 | 3.84259616166637  | 9.02353266560095  |
| C | 5.48242935453282 | 4.45718972431499  | 8.28724833012897  |
| H | 4.79922396548115 | 4.87814909685988  | 9.04068864482158  |
| H | 5.83635515784430 | 5.29677362003707  | 7.66864499301906  |
| C | 3.59837258237525 | 3.83554924517493  | 6.80939351961110  |
| C | 3.08042420378532 | 5.15975644668593  | 6.87659077158199  |
| C | 1.91008212258885 | 5.46667818734931  | 6.21772832821540  |
| C | 1.24534968404615 | 4.47234952805134  | 5.49079768326580  |
| H | 0.32350402229982 | 4.67748867863813  | 4.95773660662581  |
| C | 1.79603435196786 | 3.19946801464328  | 5.47369955928195  |
| C | 1.06624653671438 | 2.08237488877719  | 4.76686645071673  |
| H | 0.49280990154553 | 1.52248218642989  | 5.51176754992396  |
| H | 0.36342784574153 | 2.49668791513736  | 4.02934108169529  |
| C | 1.33013588809240 | -0.13251542013127 | 3.79320632641438  |
| H | 0.75191607941190 | -0.03105415855634 | 2.86332168322690  |
| H | 0.62642474072682 | -0.34260696414689 | 4.60583539155555  |
| C | 2.26355903007310 | -1.31669091256178 | 3.69714096634377  |
| C | 1.93992049926099 | -2.35810485327095 | 2.84024583297440  |
| H | 1.07865469865455 | -2.28068980766702 | 2.18553515118260  |
| C | 2.74333788852296 | -3.50284905150215 | 2.86492335686144  |
| C | 3.82988891440373 | -3.55296230408710 | 3.71091257044397  |
| C | 4.12586923146255 | -2.43684625860314 | 4.54108480616706  |
| C | 6.14035930376682 | -3.57262117898413 | 5.41788884467789  |
| H | 6.52386499657408 | -3.77679440056394 | 4.40669422803768  |
| H | 5.60549137882156 | -4.47704824270223 | 5.74846503338372  |
| C | 7.34350881503610 | -3.34290346504607 | 6.36020473947089  |
| C | 8.17629796406783 | -2.12954851822531 | 5.89933146520576  |
| H | 8.52540339409729 | -2.26165458384043 | 4.86694444117793  |
| H | 9.05992944751652 | -2.01441212637750 | 6.53814454049827  |
| H | 7.61030908487931 | -1.19376566350570 | 5.95118508416552  |
| C | 8.21805916660665 | -4.61123942162626 | 6.27788507310633  |
| H | 7.66681291170468 | -5.50167974351999 | 6.60578800713303  |
| H | 9.09854360809201 | -4.50941138814716 | 6.92253390215599  |
| H | 8.57217087839001 | -4.78990789472288 | 5.25472455551918  |
| C | 6.87311275569344 | -3.15187014569384 | 7.81634448503933  |
| H | 6.25579293484312 | -2.25654326767882 | 7.94116437658681  |
| H | 7.73915261051309 | -3.04836654705325 | 8.48107262700462  |

|    |                  |                   |                   |
|----|------------------|-------------------|-------------------|
| H  | 6.28967786106045 | -4.01648631746984 | 8.15818088984499  |
| C  | 2.69577861182901 | 1.78833119698552  | 2.96968989262049  |
| H  | 2.54345425291424 | 2.86314667686418  | 3.07635037132286  |
| H  | 2.20630479587243 | 1.48482202804809  | 2.03862175027392  |
| C  | 4.25256317038115 | 1.54257515204755  | 2.95228078275250  |
| C  | 4.93102270507193 | 2.85708478932545  | 2.48523649570198  |
| C  | 5.81295399558319 | 3.52795815223889  | 3.33893280895282  |
| H  | 6.01895566125470 | 3.10155116114475  | 4.31384690254320  |
| C  | 6.41457308662682 | 4.72399218835348  | 2.93856095734467  |
| H  | 7.10205749936908 | 5.22995163787670  | 3.61288443354905  |
| C  | 6.13814770874414 | 5.27054036023331  | 1.68480335608746  |
| H  | 6.60466877546226 | 6.20243432050677  | 1.37606869802587  |
| C  | 5.25738215488354 | 4.60667418288944  | 0.82724909469321  |
| H  | 5.03633516968905 | 5.01767714212724  | -0.15475825000180 |
| C  | 4.66361129696977 | 3.40797639934038  | 1.22345536302288  |
| H  | 3.99861538288310 | 2.89371909097892  | 0.53425219474674  |
| C  | 4.71691159246188 | 0.41468333740229  | 1.99664651009199  |
| C  | 4.07134866850868 | 0.09202558246394  | 0.79620622071507  |
| C  | 4.59417023036717 | -0.87819055142298 | -0.06447496115842 |
| H  | 4.07136151802153 | -1.11166881032625 | -0.98890107625694 |
| C  | 5.77681413641357 | -1.54098395079791 | 0.25887014600478  |
| H  | 6.18509203245043 | -2.29374431340546 | -0.41111047065772 |
| C  | 6.43127378687367 | -1.22506920345163 | 1.45249050885142  |
| H  | 7.35746412912456 | -1.73005881187104 | 1.71626216689847  |
| C  | 5.90733431290439 | -0.25877899414531 | 2.30979152400695  |
| H  | 6.41145388994401 | -0.01587790845430 | 3.23898737607504  |
| N  | 4.75004327731087 | 3.51809454690561  | 7.44427752434340  |
| H  | 5.05078655116628 | 2.54826035441018  | 7.41611374612314  |
| N  | 2.94638706514327 | 2.87012575889364  | 6.10135342760528  |
| N  | 2.00798292798921 | 1.13695589229845  | 4.12495058943950  |
| N  | 3.32452953788070 | -1.33384141230040 | 4.53152742657720  |
| N  | 5.20876761753610 | -2.45343478077954 | 5.35139731099589  |
| H  | 5.35906547969560 | -1.65384433063324 | 5.95852105159479  |
| O  | 4.64628339716134 | 1.25353216856556  | 4.25345067685741  |
| Cl | 5.36557393079633 | 0.31894368607651  | 7.12043853167555  |
| H  | 2.51789128609392 | -4.34897101719797 | 2.22091939106665  |
| H  | 4.46168473557599 | -4.43066394618485 | 3.74303378094277  |
| H  | 1.51268048025042 | 6.47750907344613  | 6.25981327772591  |
| H  | 3.61229929683866 | 5.91866473311088  | 7.43477317806927  |
| H  | 3.15080708825989 | 0.59183075144114  | 0.50657753032754  |
| Cl | 1.89069432492516 | -0.06972137452609 | 7.12757071376347  |

**Table S9.** Crystallographic data for **1**.

|                                                                            |                                                                                                                                                                                                                                                                                               |
|----------------------------------------------------------------------------|-----------------------------------------------------------------------------------------------------------------------------------------------------------------------------------------------------------------------------------------------------------------------------------------------|
| Crystal data                                                               |                                                                                                                                                                                                                                                                                               |
| Chemical formula                                                           | C <sub>36</sub> H <sub>46</sub> ClFeN <sub>5</sub> O                                                                                                                                                                                                                                          |
| $M_r$                                                                      | 656.08                                                                                                                                                                                                                                                                                        |
| Crystal system, space group                                                | Orthorhombic, $P2_12_12_1$                                                                                                                                                                                                                                                                    |
| Temperature (K)                                                            | 110                                                                                                                                                                                                                                                                                           |
| $a, b, c$ (Å)                                                              | 8.77732 (19), 17.1427 (3), 22.6633 (5)                                                                                                                                                                                                                                                        |
| $V$ (Å <sup>3</sup> )                                                      | 3410.08 (12)                                                                                                                                                                                                                                                                                  |
| $Z$                                                                        | 4                                                                                                                                                                                                                                                                                             |
| Radiation type                                                             | Mo $K\alpha$                                                                                                                                                                                                                                                                                  |
| $\mu$ (mm <sup>-1</sup> )                                                  | 0.56                                                                                                                                                                                                                                                                                          |
| Crystal size (mm)                                                          | 0.39 × 0.18 × 0.14                                                                                                                                                                                                                                                                            |
| Data collection                                                            |                                                                                                                                                                                                                                                                                               |
| Diffractometer                                                             | SuperNova, Dual, Cu at zero, Atlas                                                                                                                                                                                                                                                            |
| Absorption correction                                                      | Gaussian<br><i>CrysAlis PRO</i> 1.171.39.29c (Rigaku Oxford Diffraction, 2017)<br>Numerical absorption correction based on gaussian integration over a multifaceted crystal model Empirical absorption correction using spherical harmonics, implemented in SCALE3 ABSPACK scaling algorithm. |
| $T_{\min}, T_{\max}$                                                       | 0.524, 1.000                                                                                                                                                                                                                                                                                  |
| No. of measured, independent and observed [ $I > 2\sigma(I)$ ] reflections | 40871, 7799, 7456                                                                                                                                                                                                                                                                             |
| $R_{\text{int}}$                                                           | 0.030                                                                                                                                                                                                                                                                                         |
| $(\sin \theta/\lambda)_{\text{max}}$ (Å <sup>-1</sup> )                    | 0.650                                                                                                                                                                                                                                                                                         |
| Refinement                                                                 |                                                                                                                                                                                                                                                                                               |
| $R[F^2 > 2\sigma(F^2)], wR(F^2), S$                                        | 0.024, 0.055, 1.06                                                                                                                                                                                                                                                                            |
| No. of reflections                                                         | 7799                                                                                                                                                                                                                                                                                          |
| No. of parameters                                                          | 409                                                                                                                                                                                                                                                                                           |
| No. of restraints                                                          | 2                                                                                                                                                                                                                                                                                             |
| H-atom treatment                                                           | H atoms treated by a mixture of independent and constrained refinement                                                                                                                                                                                                                        |
| $\Delta\rho_{\text{max}}, \Delta\rho_{\text{min}}$ (e Å <sup>-3</sup> )    | 0.19, -0.18                                                                                                                                                                                                                                                                                   |
| Absolute structure                                                         | Flack $x$ determined using 3149 quotients [(I+)-(I-)]/[(I+)+(I-)] (Parsons,                                                                                                                                                                                                                   |



|                              |                                                    |
|------------------------------|----------------------------------------------------|
|                              | Flack and Wagner, Acta Cryst. B69 (2013) 249-259). |
| Absolute structure parameter | -0.014 (4)                                         |

**Table S10.** Crystallographic data for **2**.

|                                                                            |                                                                                                                                                                                                                                                                                               |
|----------------------------------------------------------------------------|-----------------------------------------------------------------------------------------------------------------------------------------------------------------------------------------------------------------------------------------------------------------------------------------------|
| Crystal data                                                               |                                                                                                                                                                                                                                                                                               |
| Chemical formula                                                           | C <sub>36</sub> H <sub>46</sub> BrFeN <sub>5</sub> O                                                                                                                                                                                                                                          |
| $M_r$                                                                      | 700.54                                                                                                                                                                                                                                                                                        |
| Crystal system, space group                                                | Orthorhombic, $P2_12_12_1$                                                                                                                                                                                                                                                                    |
| Temperature (K)                                                            | 110                                                                                                                                                                                                                                                                                           |
| $a, b, c$ (Å)                                                              | 8.9286 (2), 16.9996 (4), 22.4884 (5)                                                                                                                                                                                                                                                          |
| $V$ (Å <sup>3</sup> )                                                      | 3413.35 (13)                                                                                                                                                                                                                                                                                  |
| $Z$                                                                        | 4                                                                                                                                                                                                                                                                                             |
| Radiation type                                                             | Mo $K\alpha$                                                                                                                                                                                                                                                                                  |
| $\mu$ (mm <sup>-1</sup> )                                                  | 1.65                                                                                                                                                                                                                                                                                          |
| Crystal size (mm)                                                          | 0.43 × 0.28 × 0.06                                                                                                                                                                                                                                                                            |
| Data collection                                                            |                                                                                                                                                                                                                                                                                               |
| Diffractometer                                                             | SuperNova, Dual, Cu at zero, Atlas                                                                                                                                                                                                                                                            |
| Absorption correction                                                      | Gaussian<br><i>CrysAlis PRO</i> 1.171.39.29c (Rigaku Oxford Diffraction, 2017)<br>Numerical absorption correction based on gaussian integration over a multifaceted crystal model Empirical absorption correction using spherical harmonics, implemented in SCALE3 ABSPACK scaling algorithm. |
| $T_{\min}, T_{\max}$                                                       | -0.291, 1.000                                                                                                                                                                                                                                                                                 |
| No. of measured, independent and observed [ $I > 2\sigma(I)$ ] reflections | 52117, 7837, 7522                                                                                                                                                                                                                                                                             |
| $R_{\text{int}}$                                                           | 0.039                                                                                                                                                                                                                                                                                         |
| $(\sin \theta/\lambda)_{\text{max}}$ (Å <sup>-1</sup> )                    | 0.650                                                                                                                                                                                                                                                                                         |
| Refinement                                                                 |                                                                                                                                                                                                                                                                                               |
| $R[F^2 > 2\sigma(F^2)], wR(F^2), S$                                        | 0.022, 0.050, 1.07                                                                                                                                                                                                                                                                            |
| No. of reflections                                                         | 7837                                                                                                                                                                                                                                                                                          |
| No. of parameters                                                          | 409                                                                                                                                                                                                                                                                                           |
| No. of restraints                                                          | 2                                                                                                                                                                                                                                                                                             |
| H-atom treatment                                                           | H atoms treated by a mixture of independent and constrained refinement                                                                                                                                                                                                                        |
| $\Delta\rho_{\text{max}}, \Delta\rho_{\text{min}}$ (e Å <sup>-3</sup> )    | 0.24, -0.22                                                                                                                                                                                                                                                                                   |
| Absolute structure                                                         | Flack $x$ determined using 3191 quotients [(I+)-(I-)]/[(I+)+(I-)] (Parsons,                                                                                                                                                                                                                   |

|                              |                                                    |
|------------------------------|----------------------------------------------------|
|                              | Flack and Wagner, Acta Cryst. B69 (2013) 249-259). |
| Absolute structure parameter | -0.008 (2)                                         |

**Table S11.** Crystallographic data for **3**.

|                                                                            |                                                                                                                                                                                                                                                                                               |
|----------------------------------------------------------------------------|-----------------------------------------------------------------------------------------------------------------------------------------------------------------------------------------------------------------------------------------------------------------------------------------------|
| Crystal data                                                               |                                                                                                                                                                                                                                                                                               |
| Chemical formula                                                           | C <sub>36</sub> H <sub>47</sub> Cl <sub>1.06</sub> FeN <sub>5</sub> O <sub>1.94</sub>                                                                                                                                                                                                         |
| $M_r$                                                                      | 674.20                                                                                                                                                                                                                                                                                        |
| Crystal system, space group                                                | Monoclinic, $P2_1/n$                                                                                                                                                                                                                                                                          |
| Temperature (K)                                                            | 110                                                                                                                                                                                                                                                                                           |
| $a, b, c$ (Å)                                                              | 12.6925 (3), 13.0034 (3), 21.3161 (5)                                                                                                                                                                                                                                                         |
| $\beta$ (°)                                                                | 102.247 (2)                                                                                                                                                                                                                                                                                   |
| $V$ (Å <sup>3</sup> )                                                      | 3438.06 (14)                                                                                                                                                                                                                                                                                  |
| $Z$                                                                        | 4                                                                                                                                                                                                                                                                                             |
| Radiation type                                                             | Mo $K\alpha$                                                                                                                                                                                                                                                                                  |
| $\mu$ (mm <sup>-1</sup> )                                                  | 0.56                                                                                                                                                                                                                                                                                          |
| Crystal size (mm)                                                          | 0.34 × 0.20 × 0.09                                                                                                                                                                                                                                                                            |
| Data collection                                                            |                                                                                                                                                                                                                                                                                               |
| Diffractometer                                                             | SuperNova, Dual, Cu at zero, Atlas                                                                                                                                                                                                                                                            |
| Absorption correction                                                      | Gaussian<br><i>CrysAlis PRO</i> 1.171.39.29c (Rigaku Oxford Diffraction, 2017)<br>Numerical absorption correction based on gaussian integration over a multifaceted crystal model Empirical absorption correction using spherical harmonics, implemented in SCALE3 ABSPACK scaling algorithm. |
| $T_{\min}, T_{\max}$                                                       | 0.530, 1.000                                                                                                                                                                                                                                                                                  |
| No. of measured, independent and observed [ $I > 2\sigma(I)$ ] reflections | 54628, 7900, 6650                                                                                                                                                                                                                                                                             |
| $R_{\text{int}}$                                                           | 0.040                                                                                                                                                                                                                                                                                         |
| $(\sin \theta/\lambda)_{\text{max}}$ (Å <sup>-1</sup> )                    | 0.650                                                                                                                                                                                                                                                                                         |
| Refinement                                                                 |                                                                                                                                                                                                                                                                                               |
| $R[F^2 > 2\sigma(F^2)], wR(F^2), S$                                        | 0.042, 0.110, 1.05                                                                                                                                                                                                                                                                            |
| No. of reflections                                                         | 7900                                                                                                                                                                                                                                                                                          |
| No. of parameters                                                          | 467                                                                                                                                                                                                                                                                                           |
| No. of restraints                                                          | 123                                                                                                                                                                                                                                                                                           |
| H-atom treatment                                                           | H atoms treated by a mixture of independent and constrained refinement                                                                                                                                                                                                                        |
| $\Delta\rho_{\text{max}}, \Delta\rho_{\text{min}}$ (e Å <sup>-3</sup> )    | 0.78, -0.50                                                                                                                                                                                                                                                                                   |

**Table S12.** Crystallographic data for **4**.

|                                                                            |                                                                                                                                                                                                                                                                                               |
|----------------------------------------------------------------------------|-----------------------------------------------------------------------------------------------------------------------------------------------------------------------------------------------------------------------------------------------------------------------------------------------|
| Crystal data                                                               |                                                                                                                                                                                                                                                                                               |
| Chemical formula                                                           | C <sub>36</sub> H <sub>46.99</sub> Br <sub>1.01</sub> FeN <sub>5</sub> O <sub>1.99</sub>                                                                                                                                                                                                      |
| $M_r$                                                                      | 718.33                                                                                                                                                                                                                                                                                        |
| Crystal system, space group                                                | Monoclinic, $P2_1/n$                                                                                                                                                                                                                                                                          |
| Temperature (K)                                                            | 110                                                                                                                                                                                                                                                                                           |
| $a, b, c$ (Å)                                                              | 12.6479 (4), 13.0462 (4), 21.3658 (7)                                                                                                                                                                                                                                                         |
| $\beta$ (°)                                                                | 101.978 (3)                                                                                                                                                                                                                                                                                   |
| $V$ (Å <sup>3</sup> )                                                      | 3448.75 (19)                                                                                                                                                                                                                                                                                  |
| $Z$                                                                        | 4                                                                                                                                                                                                                                                                                             |
| Radiation type                                                             | Mo $K\alpha$                                                                                                                                                                                                                                                                                  |
| $\mu$ (mm <sup>-1</sup> )                                                  | 1.65                                                                                                                                                                                                                                                                                          |
| Crystal size (mm)                                                          | 0.42 × 0.20 × 0.04                                                                                                                                                                                                                                                                            |
| Data collection                                                            |                                                                                                                                                                                                                                                                                               |
| Diffractometer                                                             | SuperNova, Dual, Cu at zero, Atlas                                                                                                                                                                                                                                                            |
| Absorption correction                                                      | Gaussian<br><i>CrysAlis PRO</i> 1.171.39.29c (Rigaku Oxford Diffraction, 2017)<br>Numerical absorption correction based on gaussian integration over a multifaceted crystal model Empirical absorption correction using spherical harmonics, implemented in SCALE3 ABSPACK scaling algorithm. |
| $T_{\min}, T_{\max}$                                                       | 0.446, 1.000                                                                                                                                                                                                                                                                                  |
| No. of measured, independent and observed [ $I > 2\sigma(I)$ ] reflections | 51445, 7906, 6298                                                                                                                                                                                                                                                                             |
| $R_{\text{int}}$                                                           | 0.064                                                                                                                                                                                                                                                                                         |
| $(\sin \theta/\lambda)_{\text{max}}$ (Å <sup>-1</sup> )                    | 0.650                                                                                                                                                                                                                                                                                         |
| Refinement                                                                 |                                                                                                                                                                                                                                                                                               |
| $R[F^2 > 2\sigma(F^2)], wR(F^2), S$                                        | 0.039, 0.089, 1.03                                                                                                                                                                                                                                                                            |
| No. of reflections                                                         | 7906                                                                                                                                                                                                                                                                                          |
| No. of parameters                                                          | 425                                                                                                                                                                                                                                                                                           |
| No. of restraints                                                          | 3                                                                                                                                                                                                                                                                                             |
| H-atom treatment                                                           | H atoms treated by a mixture of independent and constrained refinement                                                                                                                                                                                                                        |
| $\Delta\rho_{\text{max}}, \Delta\rho_{\text{min}}$ (e Å <sup>-3</sup> )    | 0.51, -0.49                                                                                                                                                                                                                                                                                   |

**Table S13.** Crystallographic data for **5**.

|                                                                            |                                                                                                                                                                                                                                                                                               |
|----------------------------------------------------------------------------|-----------------------------------------------------------------------------------------------------------------------------------------------------------------------------------------------------------------------------------------------------------------------------------------------|
| Crystal data                                                               |                                                                                                                                                                                                                                                                                               |
| Chemical formula                                                           | C <sub>36</sub> H <sub>46</sub> Cl <sub>2</sub> FeN <sub>5</sub> O·2(C <sub>4</sub> H <sub>8</sub> O)                                                                                                                                                                                         |
| $M_r$                                                                      | 835.73                                                                                                                                                                                                                                                                                        |
| Crystal system, space group                                                | Monoclinic, <i>C2/c</i>                                                                                                                                                                                                                                                                       |
| Temperature (K)                                                            | 110                                                                                                                                                                                                                                                                                           |
| $a, b, c$ (Å)                                                              | 32.8869 (9), 11.1130 (3), 23.5812 (5)                                                                                                                                                                                                                                                         |
| $\beta$ (°)                                                                | 90.019 (2)                                                                                                                                                                                                                                                                                    |
| $V$ (Å <sup>3</sup> )                                                      | 8618.3 (4)                                                                                                                                                                                                                                                                                    |
| $Z$                                                                        | 8                                                                                                                                                                                                                                                                                             |
| Radiation type                                                             | Mo $K\alpha$                                                                                                                                                                                                                                                                                  |
| $\mu$ (mm <sup>-1</sup> )                                                  | 0.52                                                                                                                                                                                                                                                                                          |
| Crystal size (mm)                                                          | 0.51 × 0.45 × 0.06                                                                                                                                                                                                                                                                            |
| Data collection                                                            |                                                                                                                                                                                                                                                                                               |
| Diffractometer                                                             | SuperNova, Dual, Cu at zero, Atlas                                                                                                                                                                                                                                                            |
| Absorption correction                                                      | Gaussian<br><i>CrysAlis PRO</i> 1.171.39.29c (Rigaku Oxford Diffraction, 2017)<br>Numerical absorption correction based on gaussian integration over a multifaceted crystal model Empirical absorption correction using spherical harmonics, implemented in SCALE3 ABSPACK scaling algorithm. |
| $T_{\min}, T_{\max}$                                                       | 0.196, 1.000                                                                                                                                                                                                                                                                                  |
| No. of measured, independent and observed [ $I > 2\sigma(I)$ ] reflections | 66787, 9900, 9178                                                                                                                                                                                                                                                                             |
| $R_{\text{int}}$                                                           | 0.049                                                                                                                                                                                                                                                                                         |
| $(\sin \theta/\lambda)_{\text{max}}$ (Å <sup>-1</sup> )                    | 0.650                                                                                                                                                                                                                                                                                         |
| Refinement                                                                 |                                                                                                                                                                                                                                                                                               |
| $R[F^2 > 2\sigma(F^2)], wR(F^2), S$                                        | 0.032, 0.079, 1.05                                                                                                                                                                                                                                                                            |
| No. of reflections                                                         | 9900                                                                                                                                                                                                                                                                                          |
| No. of parameters                                                          | 546                                                                                                                                                                                                                                                                                           |
| No. of restraints                                                          | 162                                                                                                                                                                                                                                                                                           |
| H-atom treatment                                                           | H atoms treated by a mixture of independent and constrained refinement                                                                                                                                                                                                                        |
| $\Delta\rho_{\text{max}}, \Delta\rho_{\text{min}}$ (e Å <sup>-3</sup> )    | 0.46, -0.28                                                                                                                                                                                                                                                                                   |

## E. Supporting Figures.

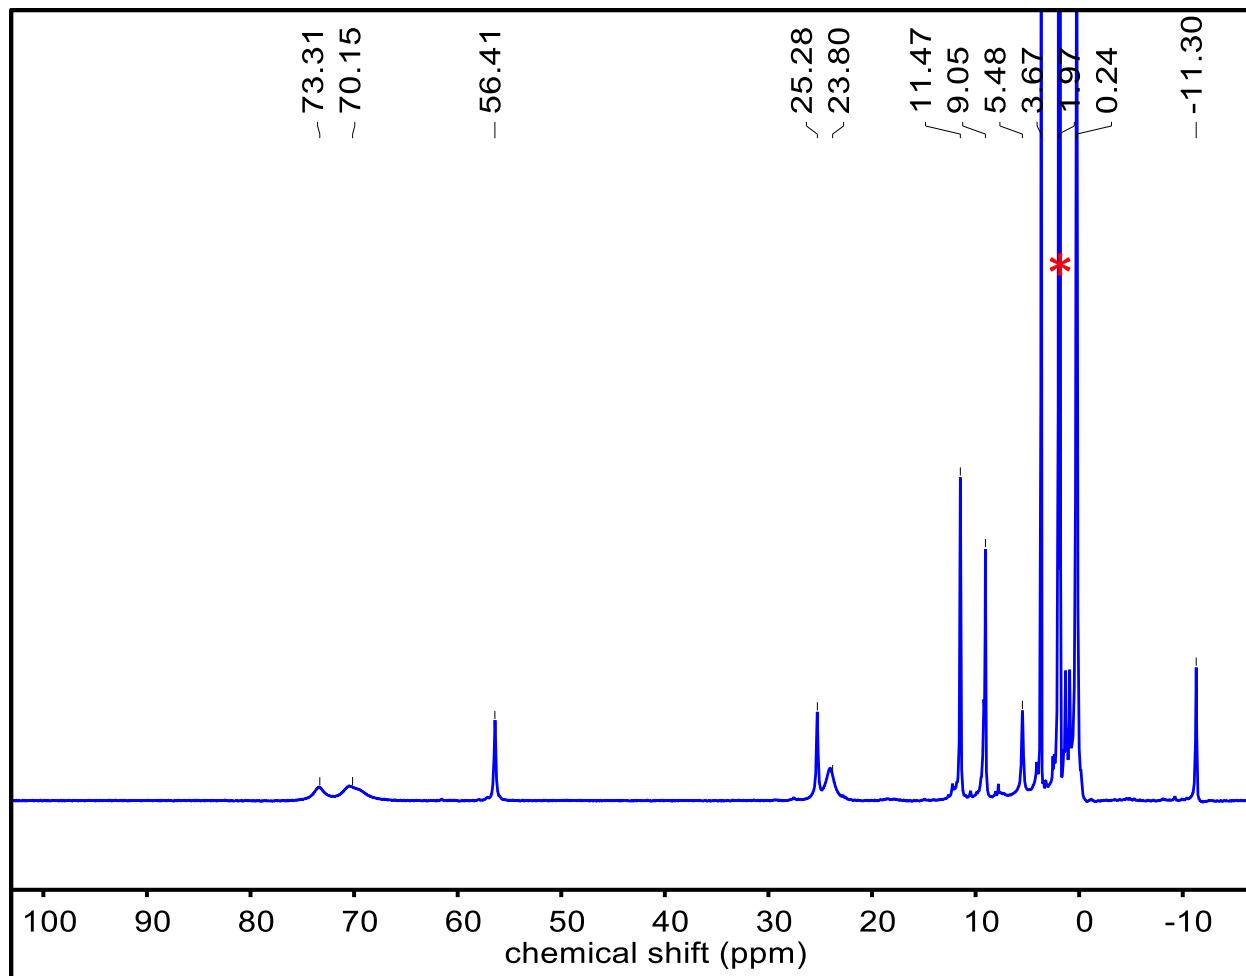

**Figure S1.**  $^1\text{H}$  NMR spectrum of  $\text{Fe}^{\text{II}}(\text{BNPA}^{\text{Ph}_2\text{O}})(\text{Cl})$  (**1**) in  $\text{CD}_3\text{CN}$  at 23 °C. Residual solvent peak for  $\text{CD}_3\text{CN}$  peak is marked with a red asterisk (\*).

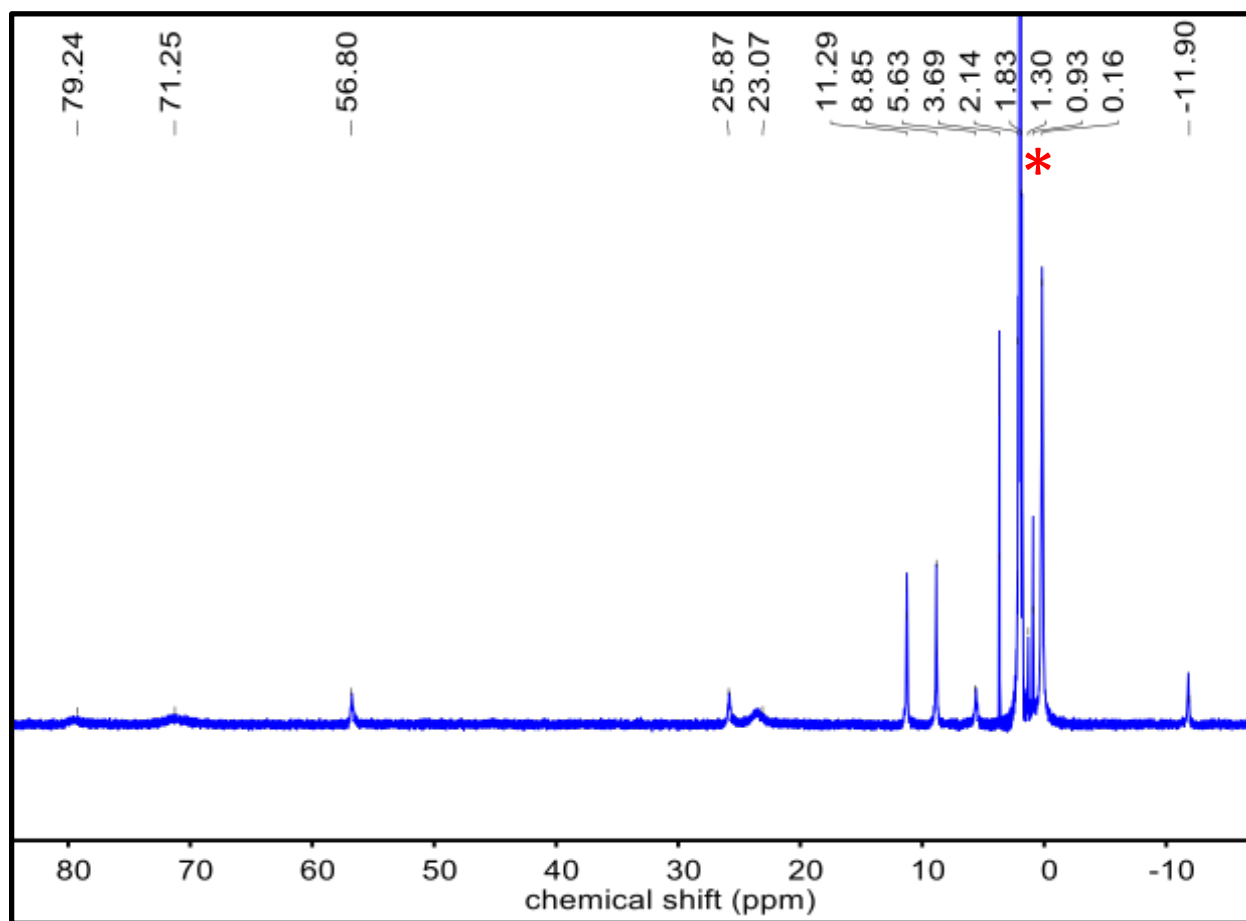

**Figure S2.** <sup>1</sup>H NMR spectrum of Fe<sup>II</sup>(BNPA<sup>Ph<sub>2</sub>O</sup>)(Br) (**2**) in CD<sub>3</sub>CN at 23 °C. Residual solvent peak for CD<sub>3</sub>CN peak is marked with a red asterisk (\*).



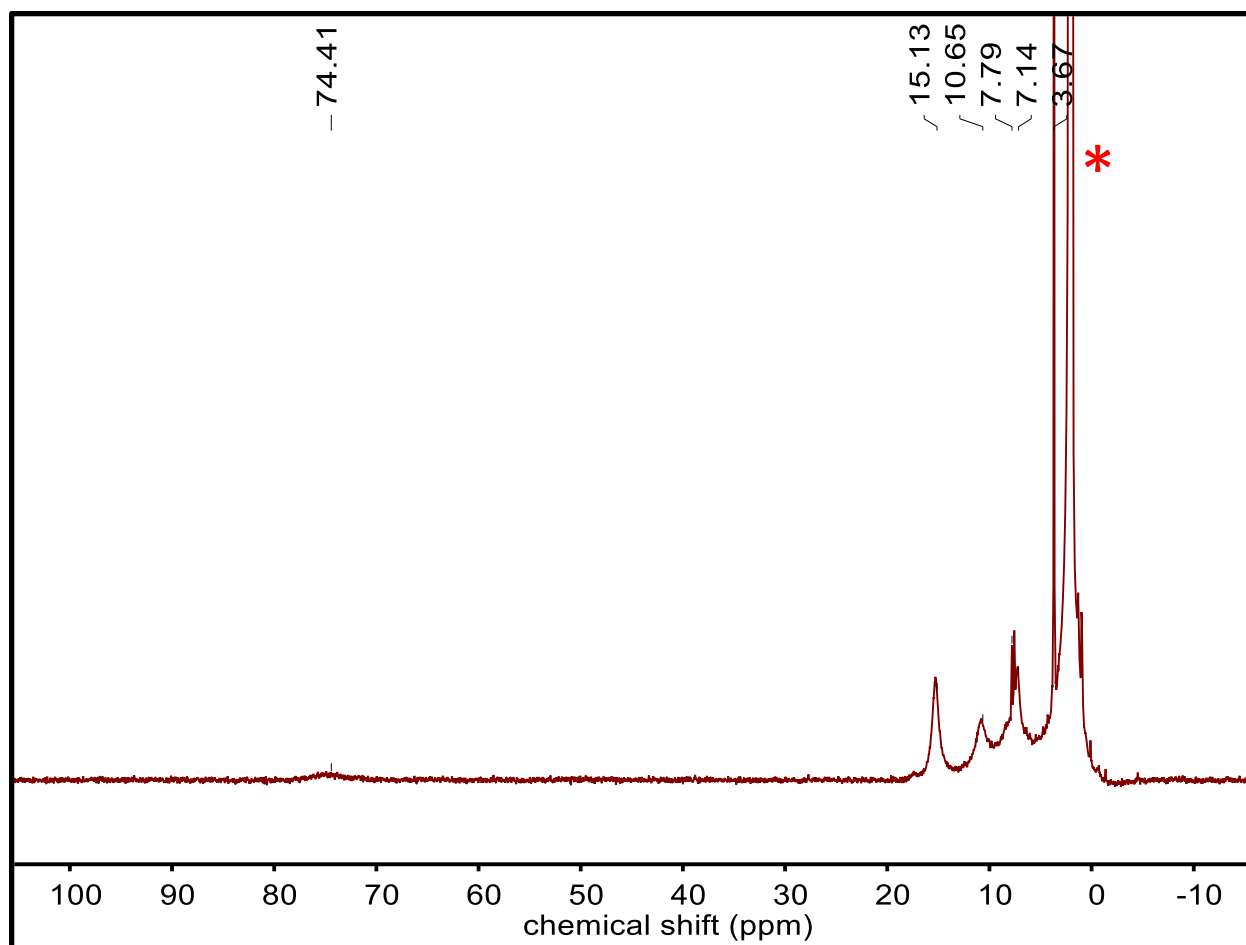

**Figure S3.** <sup>1</sup>H NMR spectrum of Fe<sup>III</sup>(BNPA<sup>Ph<sub>2</sub>O</sup>)(OH)(Cl) (**3**) in CD<sub>3</sub>CN at 23 °C. Residual solvent peak for CD<sub>3</sub>CN is marked with a red asterisk (\*).

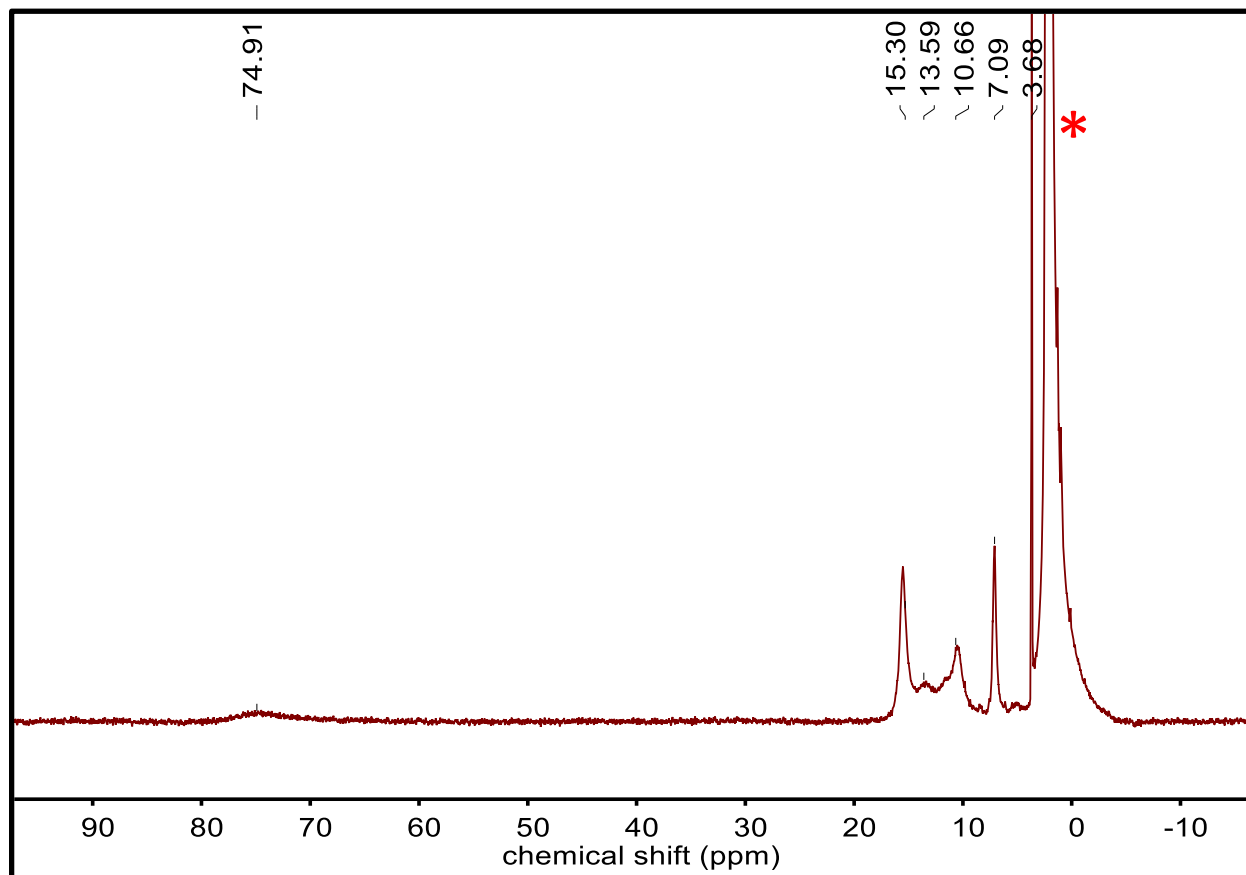

**Figure S4.**  $^1\text{H}$  NMR spectrum of  $\text{Fe}^{\text{III}}(\text{BNPA}^{\text{Ph}_2\text{O}})(\text{OH})(\text{Br})$  (**4**) in  $\text{CD}_3\text{CN}$  at  $23^\circ\text{C}$ . Residual solvent peak for  $\text{CD}_3\text{CN}$  is marked with a red asterisk (\*).

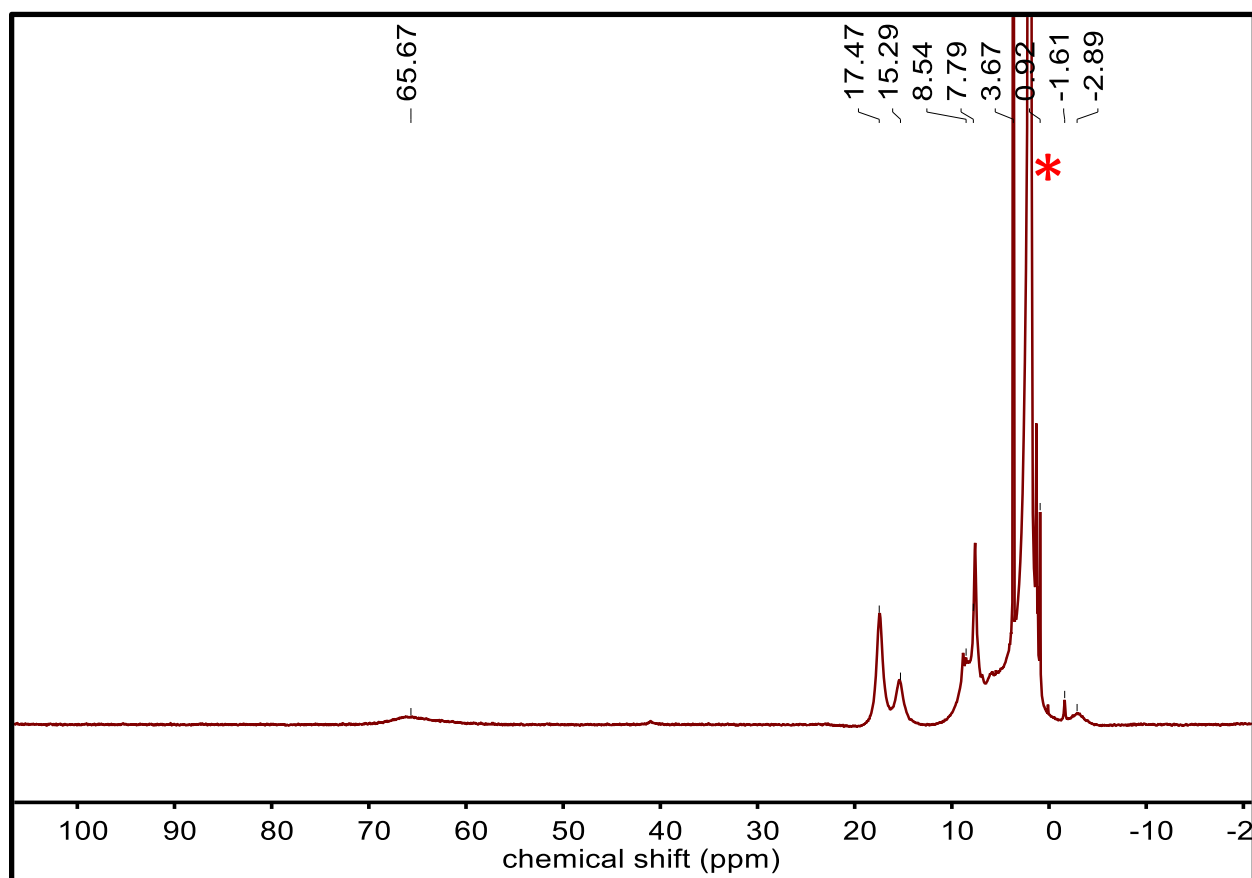

**Figure S5.**  $^1\text{H}$  NMR spectrum of  $\text{Fe}^{\text{III}}(\text{BNPA}^{\text{Ph}_2\text{O}})(\text{Cl})_2$  (**5**) in  $\text{CD}_3\text{CN}$  at 23 °C. Residual solvent peak for  $\text{CD}_3\text{CN}$  is marked with a red asterisk (\*).

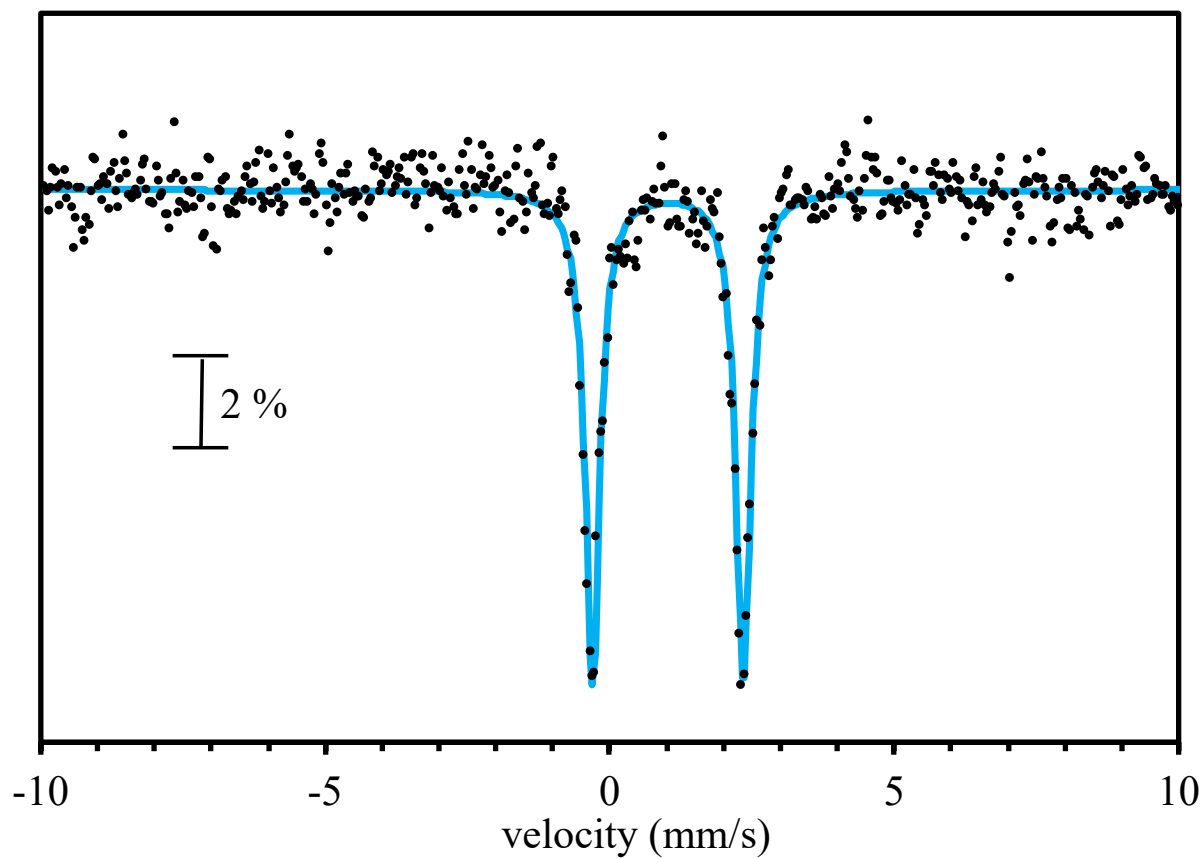

**Figure S6.** Zero field  $^{57}\text{Fe}$  Mössbauer spectrum of  $\text{Fe}^{\text{II}}(\text{BNPA}^{\text{Ph}_2\text{O}})(\text{Cl})$  (**1**) in frozen 2-MeTHF at 80 K. Experimental data = black circles, best fit = blue line, with parameters  $\delta = 1.02 \text{ mm s}^{-1}$  and  $|\Delta E_{\text{Q}}| = 2.65 \text{ mm s}^{-1}$ ,  $\Gamma_{\text{R}} = \Gamma_{\text{L}} = 0.32$ .

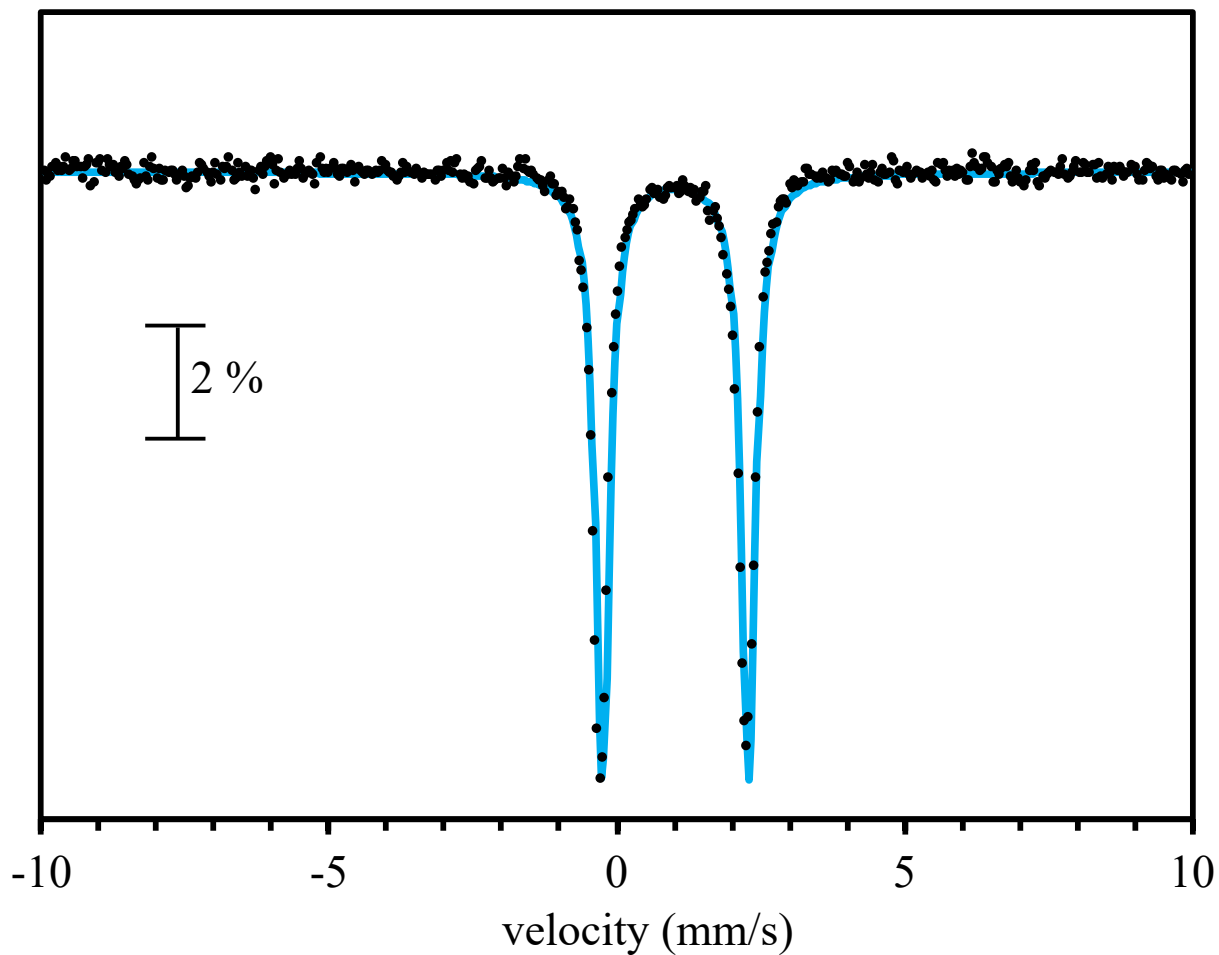

**Figure S7.** Zero field  $^{57}\text{Fe}$  Mössbauer spectrum of  $\text{Fe}^{\text{II}}(\text{BNPA}^{\text{Ph}_2\text{O}})(\text{Br})$  (**2**) in frozen 2-MeTHF at 80 K. Experimental data = black circles, best fit = blue line, with parameters  $\delta = 1.03 \text{ mm s}^{-1}$  and  $|\Delta E_Q| = 2.55 \text{ mm s}^{-1}$ ,  $\Gamma_R = \Gamma_L = 0.29$ .

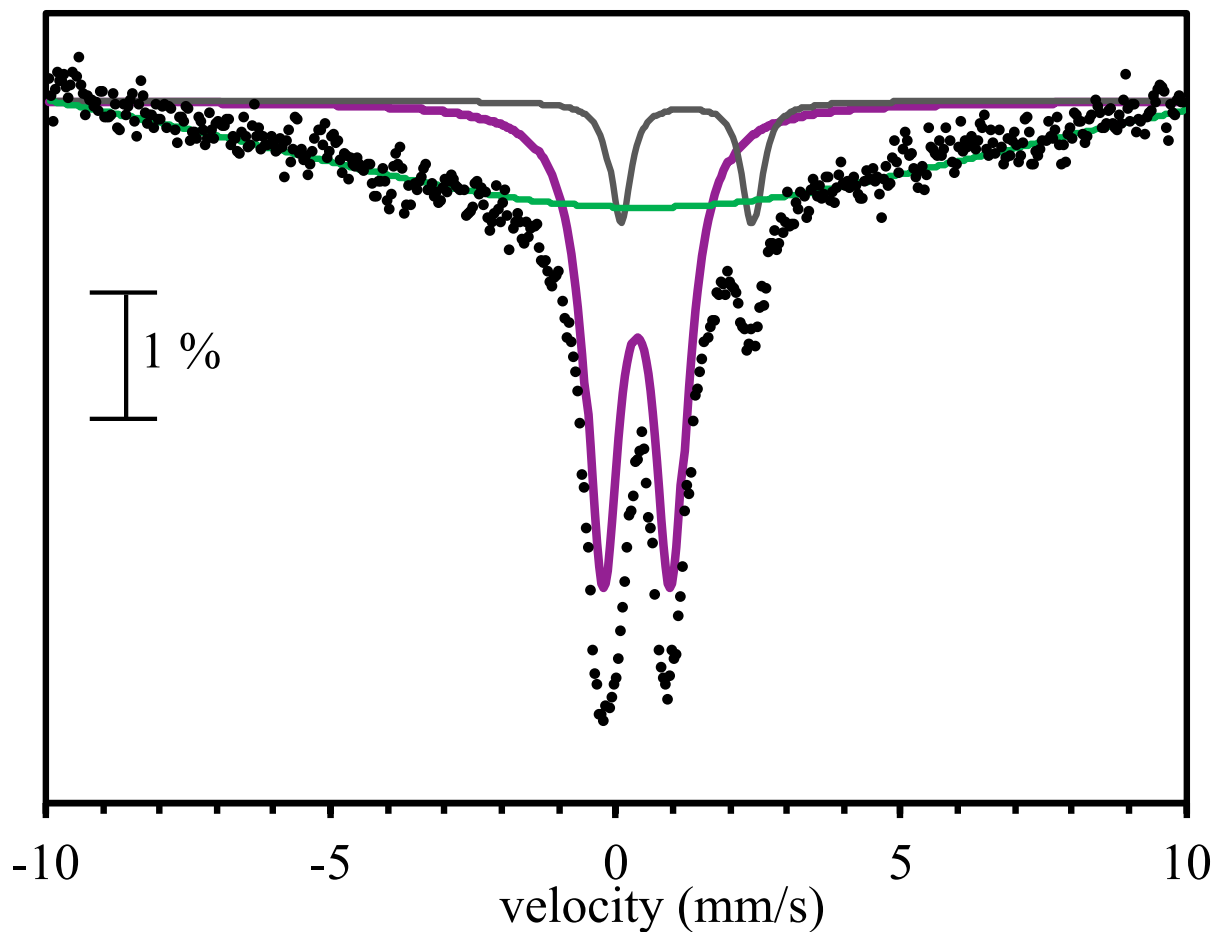

**Figure S8.** Zero field  $^{57}\text{Fe}$  Mössbauer spectrum of  $\text{Fe}^{\text{III}}(\text{BNPA}^{\text{Ph}_2\text{O}})(\text{OH})(\text{Cl})$  (**3**) as a solid film at 80 K. Experimental data = black circles, best fits = solid lines, with parameters: subsite 1 (purple line)  $\delta = 0.42 \text{ mm s}^{-1}$  and  $|\Delta E_Q| = 1.01 \text{ mm s}^{-1}$ ,  $\Gamma_R = \Gamma_L = 0.72$ , % I = 92; subsite 2 (gray line)  $\delta = 0.99 \text{ mm s}^{-1}$  and  $|\Delta E_Q| = 2.83 \text{ mm s}^{-1}$ ,  $\Gamma_R = \Gamma_L = 0.42$ , % I = 08; subsite 3 (green line)  $\delta = 0.22 \text{ mm s}^{-1}$  and  $|\Delta E_Q| = 0.56 \text{ mm s}^{-1}$ ,  $\Gamma_R = \Gamma_L = 16.7$ . The third component was added to represent the intermediate relaxation of the doublet at 80 K.

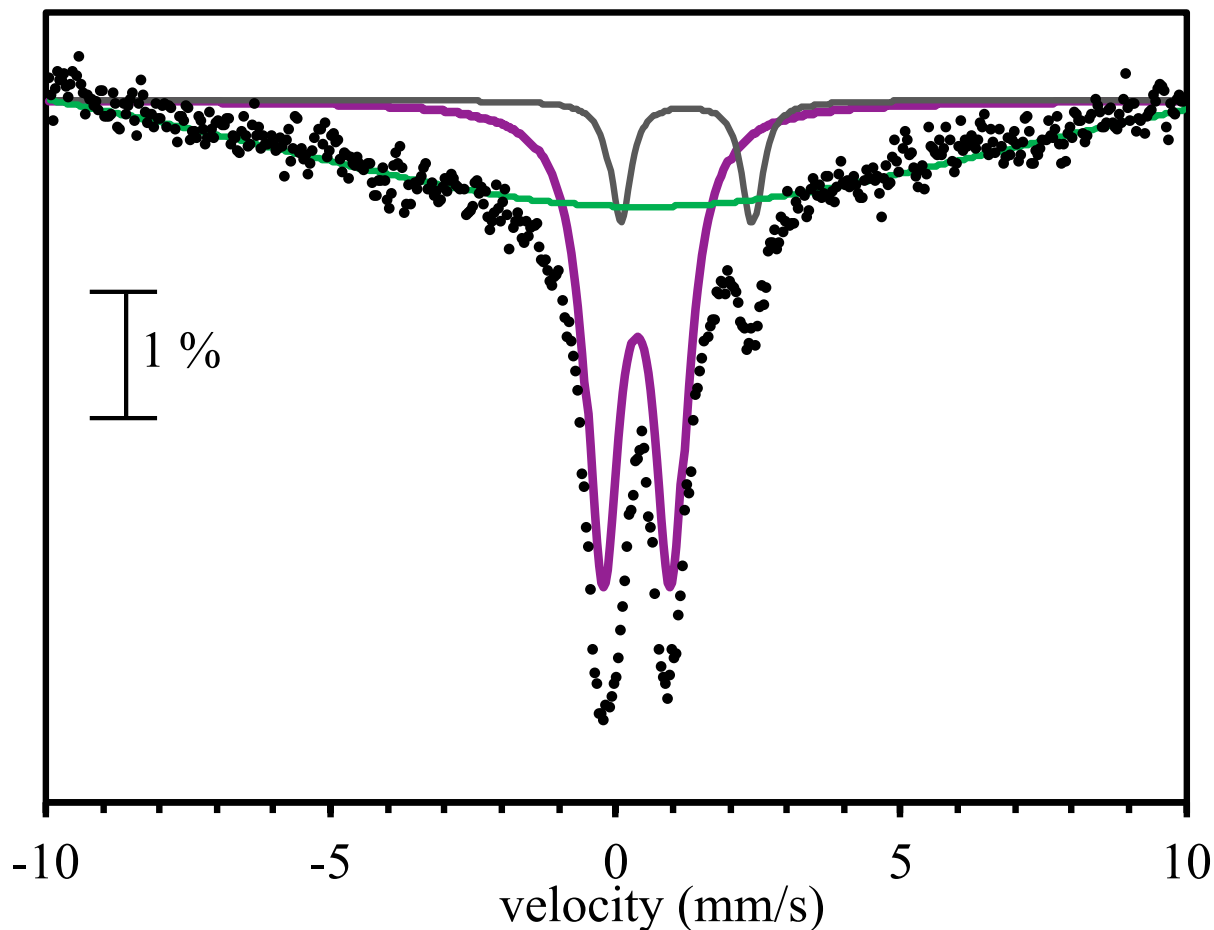

**Figure S9.** Zero field  $^{57}\text{Fe}$  Mössbauer spectrum of  $\text{Fe}^{\text{III}}(\text{BNPA}^{\text{Ph}_2\text{O}})(\text{OH})(\text{Br})$  (**4**) as a solid film at 80 K. Experimental data = black circles, best fits = solid lines, with parameters: subsite 1 (purple line)  $\delta = 0.41 \text{ mm s}^{-1}$  and  $|\Delta E_Q| = 1.10 \text{ mm s}^{-1}$ ,  $\Gamma_R = \Gamma_L = 0.71$ , % area = 91; subsite 2 (gray line)  $\delta = 1.23 \text{ mm s}^{-1}$  and  $|\Delta E_Q| = 2.30 \text{ mm s}^{-1}$ ,  $\Gamma_R = \Gamma_L = 0.42$ , % area = 09; subsite 3 (green line)  $\delta = 0.24 \text{ mm s}^{-1}$  and  $|\Delta E_Q| = 0.47 \text{ mm s}^{-1}$ ,  $\Gamma_R = \Gamma_L = 17.4$ . The third component was added to represent the intermediate relaxation of the doublet at 80 K.

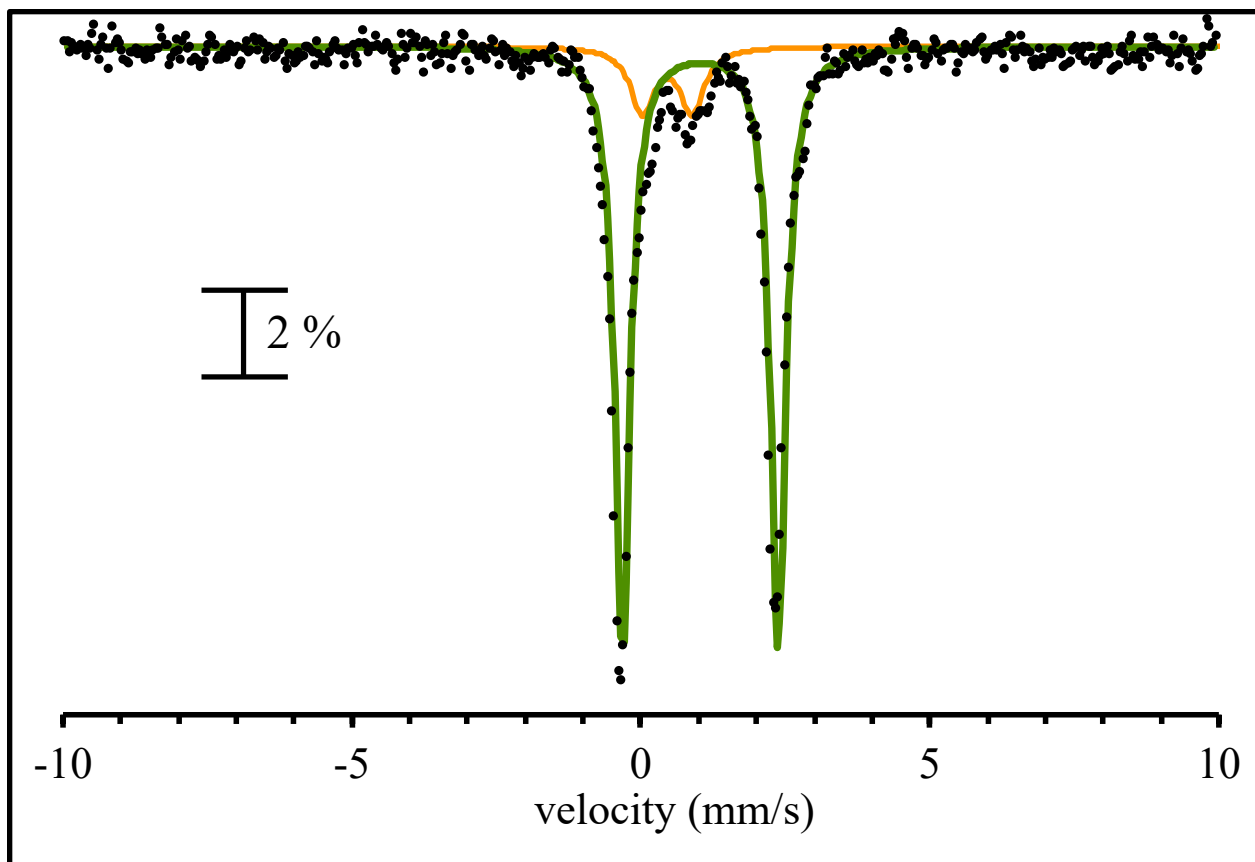

**Figure S10.** Zero field  $^{57}\text{Fe}$  Mössbauer spectrum of the reaction  $^{57}\text{Fe}^{\text{III}}(\text{BNPA}^{\text{Ph}_2\text{O}})(\text{OH})(\text{Cl})$  (**3**) with  $(p\text{-OMe-C}_6\text{H}_4)_3\text{C}\cdot$  (1 equiv) in 2-MeTHF at 80 K. Experimental data = black circles, best fits = solid lines, with parameters: subsite 1 (green line)  $\delta = 1.02 \text{ mm s}^{-1}$  and  $|\Delta E_{\text{Q}}| = 2.69 \text{ mm s}^{-1}$ ,  $\Gamma_{\text{R}} = \Gamma_{\text{L}} = 0.32$ , % area = 94; subsite 2 (orange line)  $\delta = 0.45 \text{ mm s}^{-1}$  and  $|\Delta E_{\text{Q}}| = 0.86 \text{ mm s}^{-1}$ ,  $\Gamma_{\text{R}} = \Gamma_{\text{L}} = 0.49$ , % area = 06.



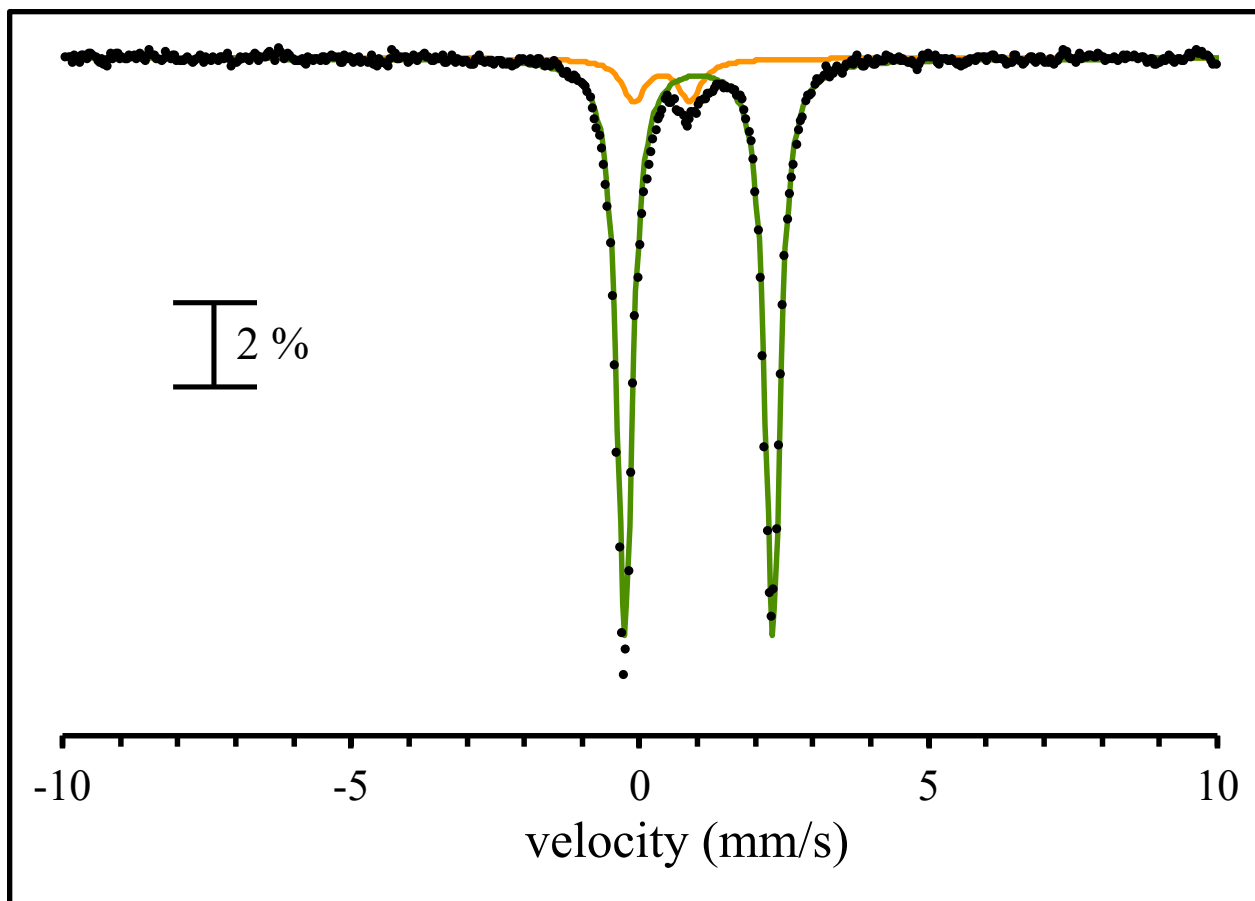

**Figure S11.** Zero field  $^{57}\text{Fe}$  Mössbauer spectrum of the reaction  $^{57}\text{Fe}^{\text{III}}(\text{BNPA}^{\text{Ph}_2\text{O}})(\text{OH})(\text{Br})$  (**4**) with  $(p\text{-OMe-C}_6\text{H}_4)_3\text{C}\cdot$  (1 equiv) in 2-MeTHF at 80 K. Experimental data = black circles, best fits = solid lines, with parameters: subsite 1 (green line)  $\delta = 1.03 \text{ mm s}^{-1}$  and  $|\Delta E_Q| = 2.55 \text{ mm s}^{-1}$ ,  $\Gamma_R = \Gamma_L = 0.30$ , % area = 95; subsite 2 (orange line)  $\delta = 0.43 \text{ mm s}^{-1}$  and  $|\Delta E_Q| = 0.91 \text{ mm s}^{-1}$ ,  $\Gamma_R = \Gamma_L = 0.47$ , % area = 05.

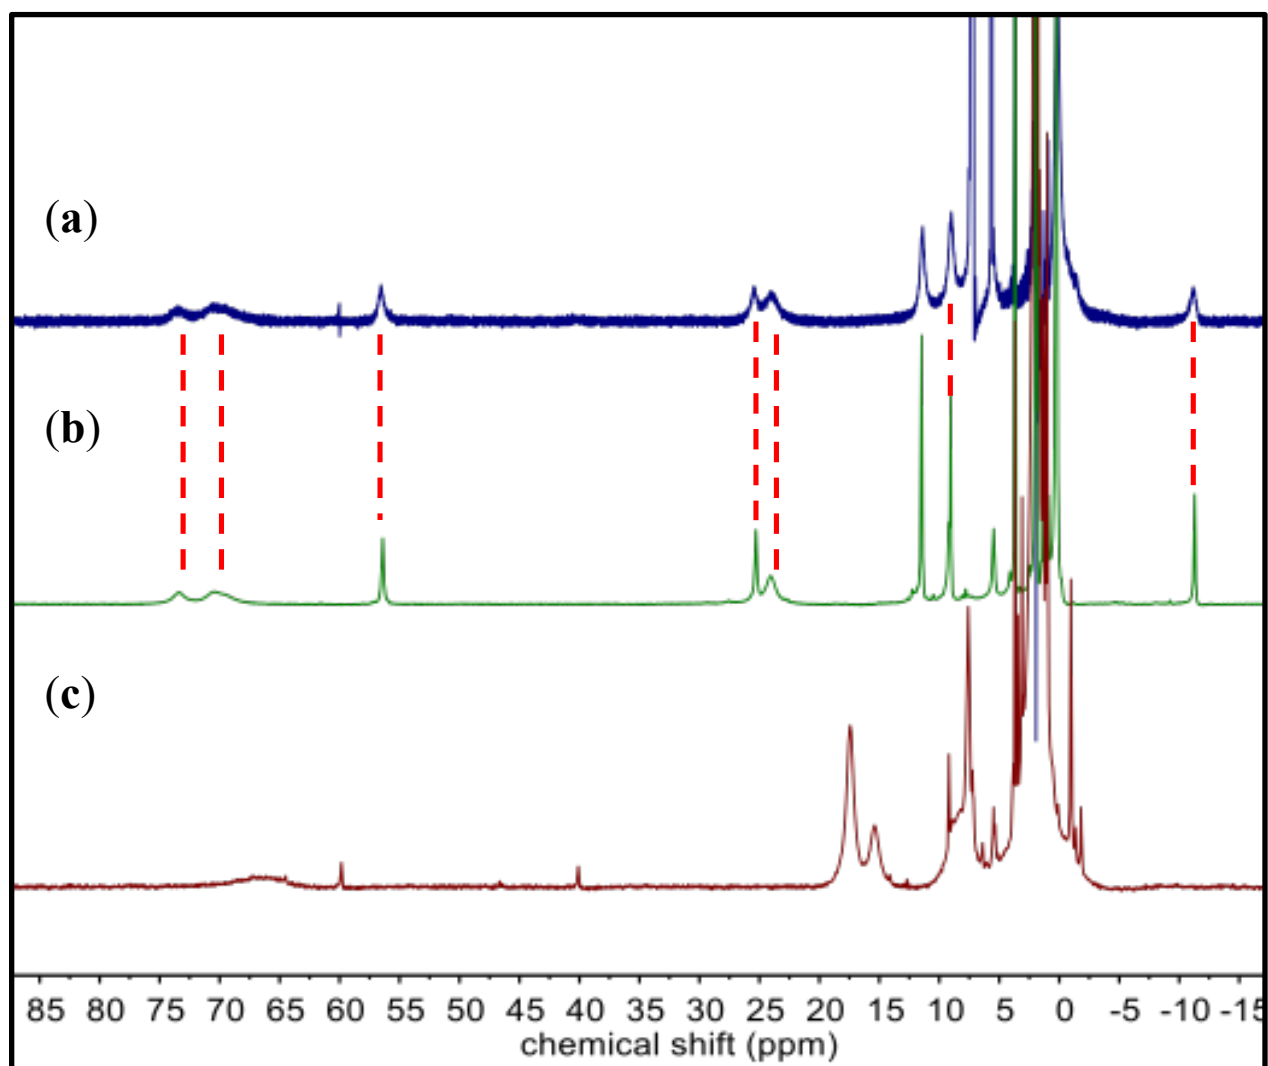

**Figure S12.** <sup>1</sup>H NMR spectra of (a) reaction mixture of Fe<sup>III</sup>(BNPA<sup>Ph2O</sup>)(Cl)<sub>2</sub> (**5**) with (*p*-OMe-C<sub>6</sub>H<sub>4</sub>)<sub>3</sub>C•, (b) Fe<sup>II</sup>(BNPA<sup>Ph2O</sup>)(Cl) (**3**) and (c) Fe<sup>III</sup>(BNPA<sup>Ph2O</sup>)(Cl)<sub>2</sub> in CD<sub>3</sub>CN at 23 °C.

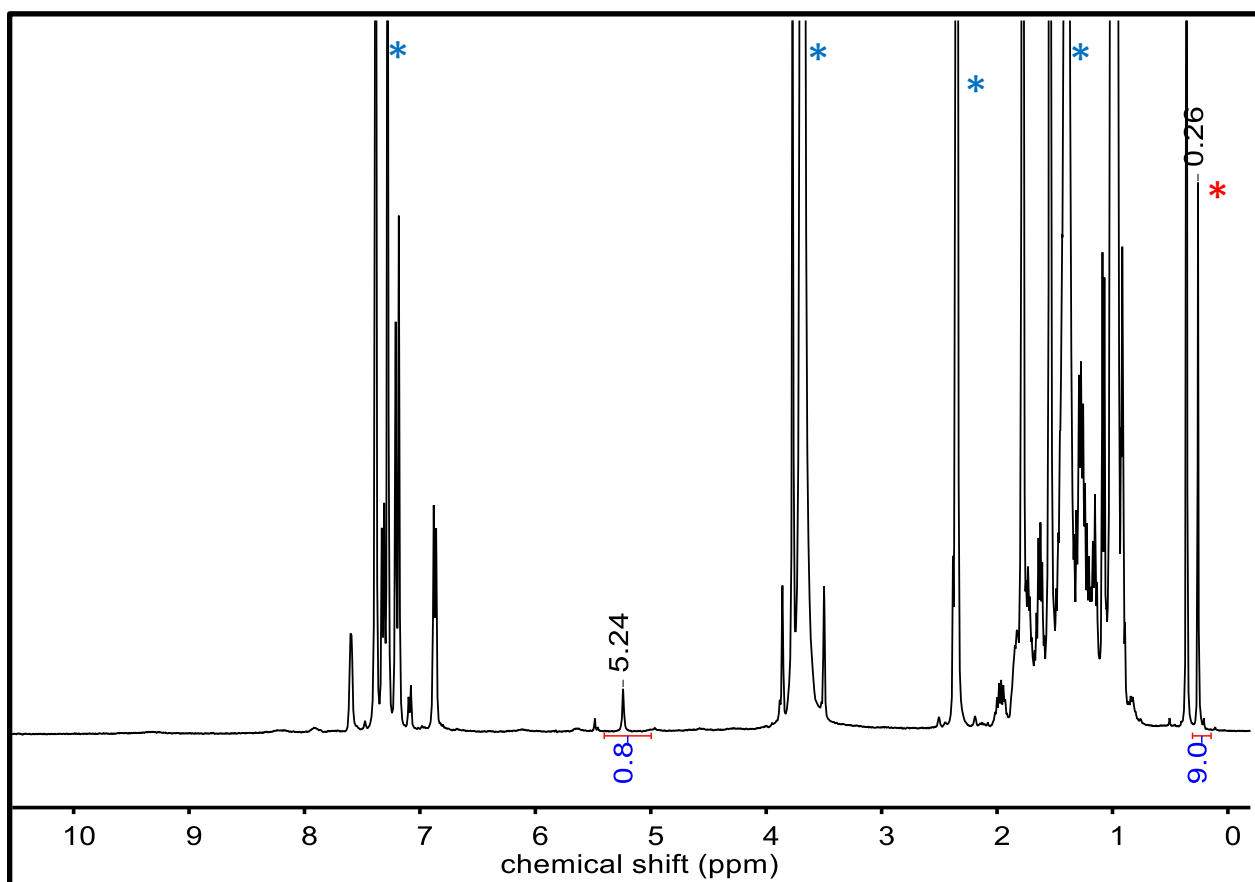

**Figure S13.** Quantification by  $^1\text{H}$  NMR spectroscopy of  $(p\text{-OMe-C}_6\text{H}_4)_3\text{COH}$  in the reaction of **3** and  $(p\text{-OMe-C}_6\text{H}_4)_3\text{C}\cdot$  in  $\text{THF-}d_8/\text{toluene-}d_8$  (5/1 v/v) at 23 °C. The peak for the internal standard trimethylphenylsilane is marked with a red asterisk (\*). The peak at  $\delta$  5.24 ppm corresponds to the -OH peak of  $(p\text{-OMe-C}_6\text{H}_4)_3\text{COH}$ . Residual solvent peaks for  $\text{THF-}d_8$  and  $\text{toluene-}d_8$  are marked with a blue asterisk (\*).

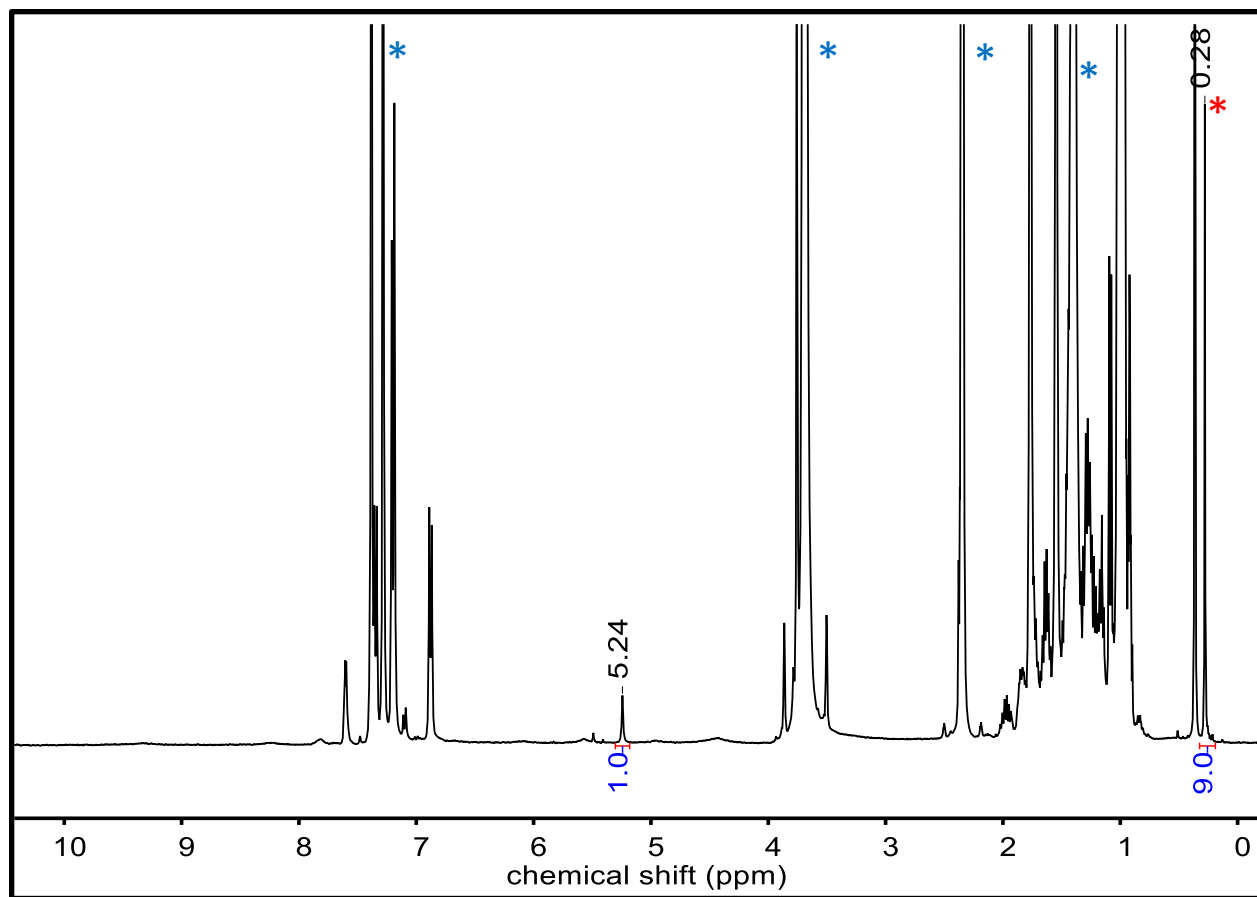

**Figure S14.** Quantification by <sup>1</sup>H NMR spectroscopy of (*p*-OMe-C<sub>6</sub>H<sub>4</sub>)<sub>3</sub>COH in the reaction of **4** and (*p*-OMe-C<sub>6</sub>H<sub>4</sub>)<sub>3</sub>C• in THF-*d*<sub>8</sub>/toluene-*d*<sub>8</sub> (5/1 v/v) at 23 °C. The peak for the internal standard trimethylphenylsilane is marked with a red asterisk (\*). The peak at δ 5.24 ppm corresponds to the -OH peak of (*p*-OMe-C<sub>6</sub>H<sub>4</sub>)<sub>3</sub>COH. Residual solvent peaks for THF-*d*<sub>8</sub> and toluene-*d*<sub>8</sub> are marked with a blue asterisk (\*).

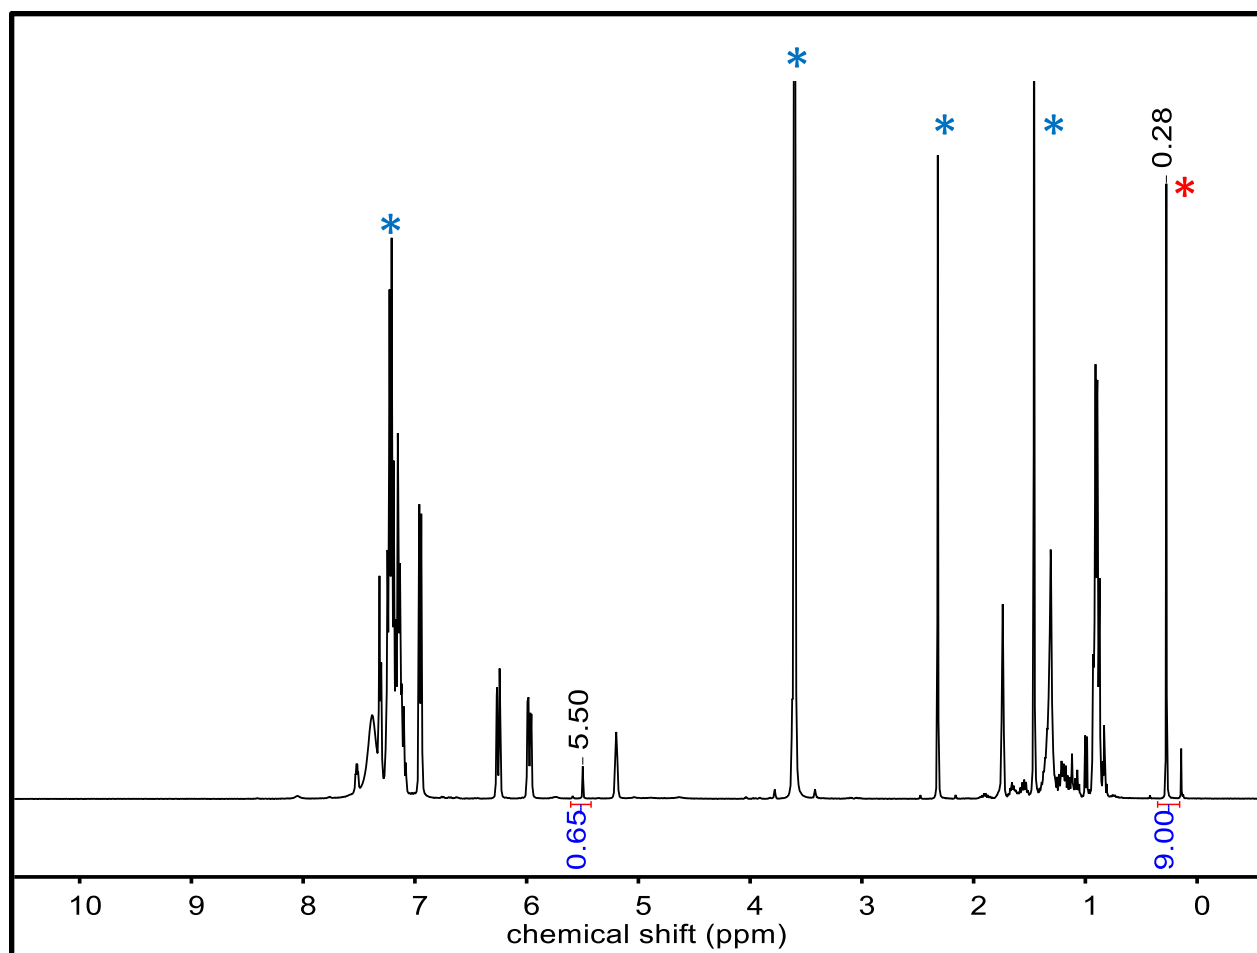

**Figure S15.** Quantification by <sup>1</sup>H NMR spectroscopy of Ph<sub>3</sub>COH in the reaction of **3** and Ph<sub>3</sub>C• in THF-*d*<sub>8</sub>/toluene-*d*<sub>8</sub> (4/1 v/v) at 23 °C. The peak for the internal standard trimethylphenylsilane is marked with a red asterisk (\*). The peak at δ 5.50 ppm corresponds to the -OH peak of Ph<sub>3</sub>COH. Residual solvent peaks for THF-*d*<sub>8</sub> and toluene-*d*<sub>8</sub> are marked with a blue asterisk (\*).

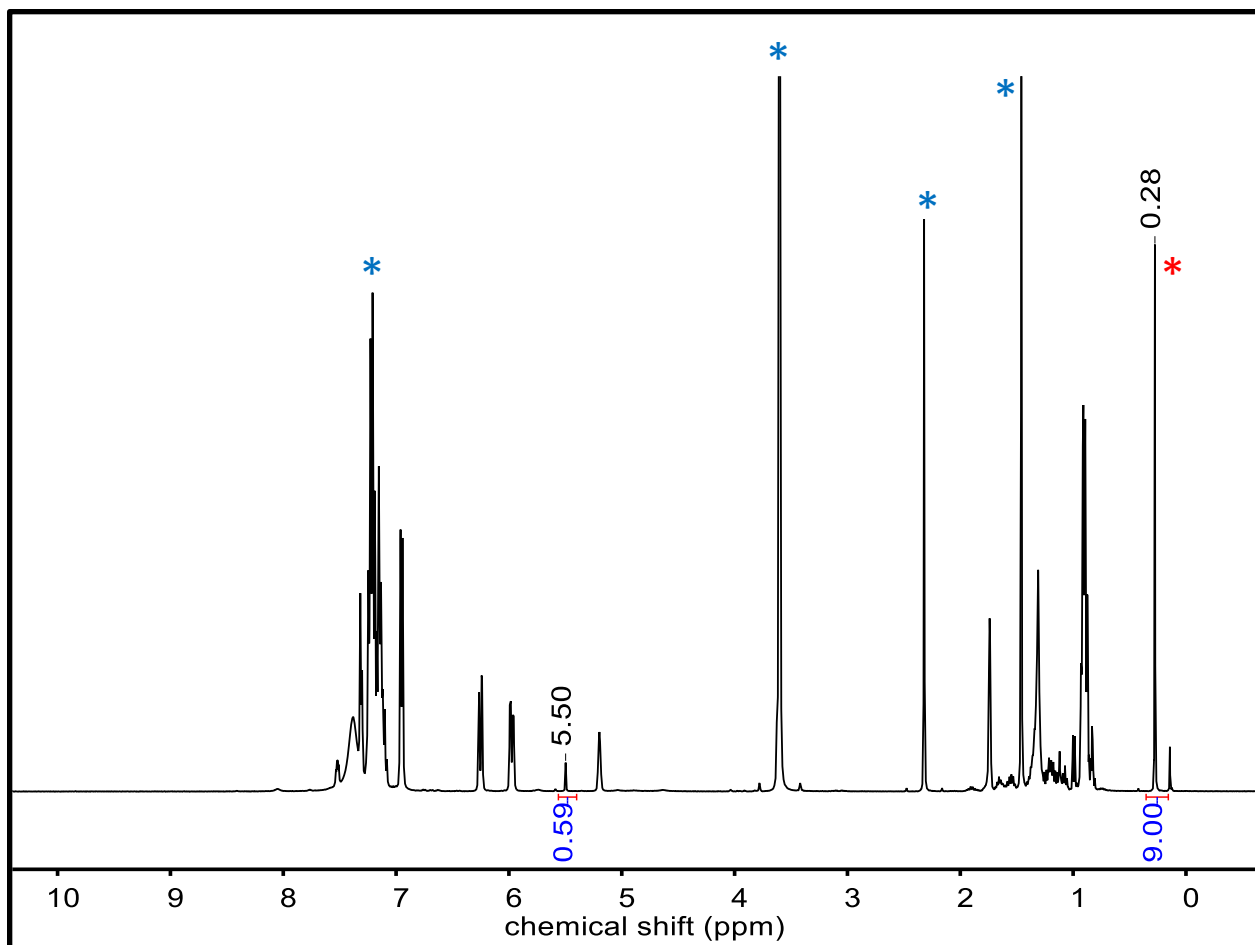

**Figure S16.** Quantification by  $^1\text{H}$  NMR spectroscopy of  $\text{Ph}_3\text{COH}$  in the reaction of **4** and  $\text{Ph}_3\text{C}\cdot$  in  $\text{THF-}d_8/\text{toluene-}d_8$  (4/1 v/v) at 23 °C. The peak for the internal standard trimethylphenylsilane is marked with a red asterisk (\*). The peak at  $\delta$  5.50 ppm corresponds to the -OH peak of  $\text{Ph}_3\text{COH}$ . Residual solvent peaks for  $\text{THF-}d_8$  and  $\text{toluene-}d_8$  are marked with a blue asterisk (\*).

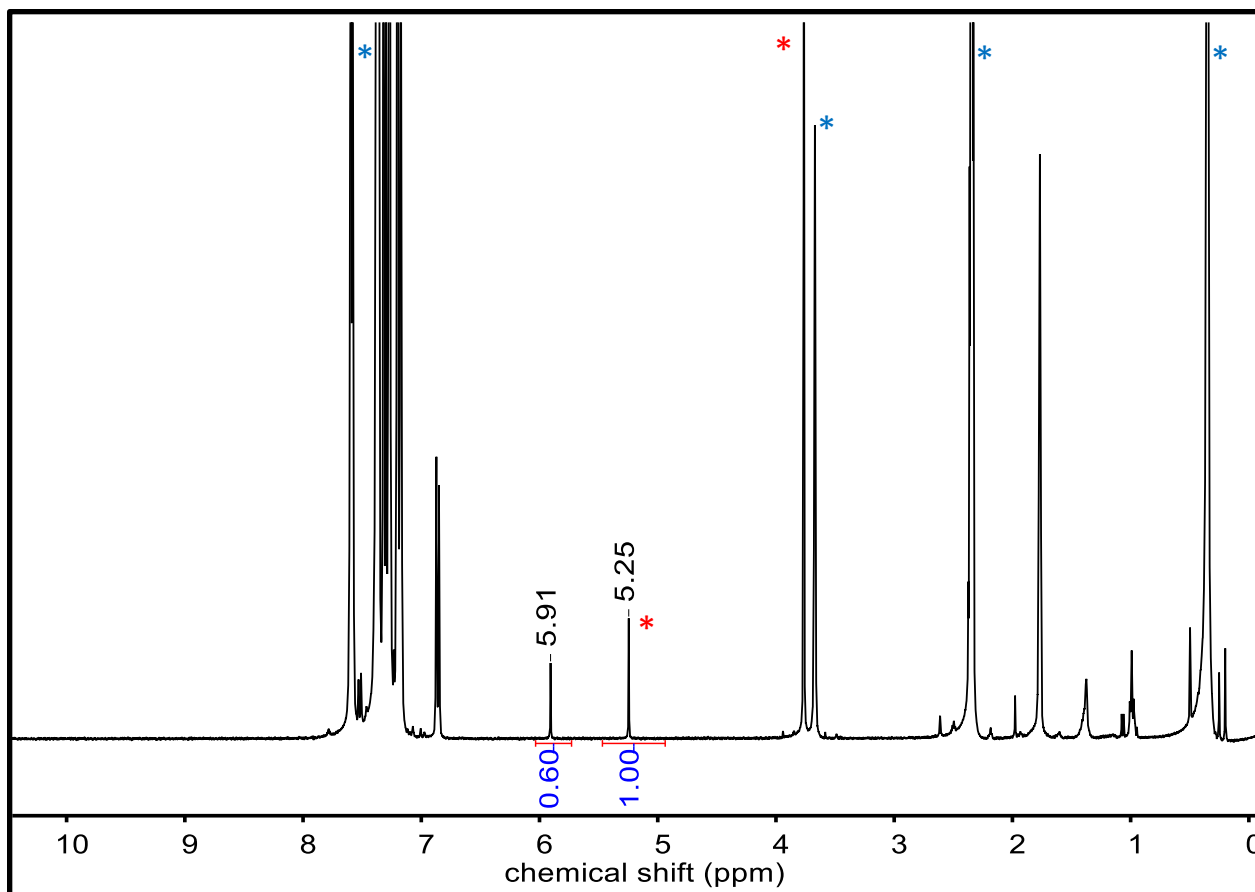

**Figure S17.** Quantification by <sup>1</sup>H NMR spectroscopy of (*p*-Cl-C<sub>6</sub>H<sub>4</sub>)<sub>3</sub>COH in the reaction of **3** and (*p*-Cl-C<sub>6</sub>H<sub>4</sub>)<sub>3</sub>C• in THF-*d*<sub>8</sub>/toluene-*d*<sub>8</sub> (4/2 v/v) at 23 °C. The peaks for the internal standard (*p*-OMe-C<sub>6</sub>H<sub>4</sub>)<sub>3</sub>COH are marked with a red asterisk (\*). The peak at δ 5.91 ppm corresponds to the -OH peak of (*p*-Cl-C<sub>6</sub>H<sub>4</sub>)<sub>3</sub>COH and the peak at δ 5.25 ppm corresponds to the -OH peak for the internal standard. Residual solvent peaks for THF-*d*<sub>8</sub> and toluene-*d*<sub>8</sub> are marked with a blue asterisk (\*).

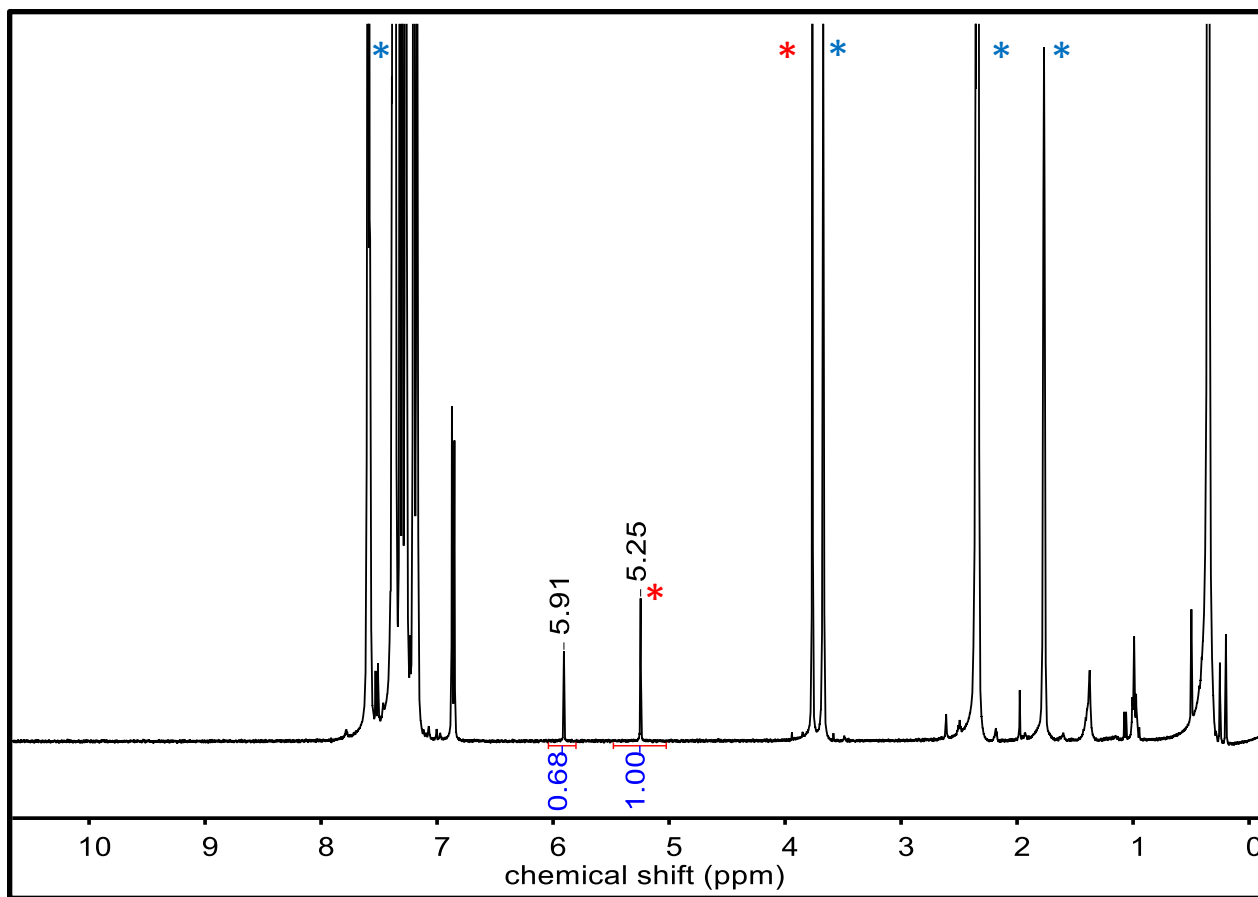

**Figure S18.** Quantification by <sup>1</sup>H NMR spectroscopy of (*p*-Cl-C<sub>6</sub>H<sub>4</sub>)<sub>3</sub>COH in the reaction of **4** and (*p*-Cl-C<sub>6</sub>H<sub>4</sub>)<sub>3</sub>C• in THF-*d*<sub>8</sub>/toluene-*d*<sub>8</sub> (4/2 v/v) at 23 °C. The peaks for the internal standard (*p*-OMe-C<sub>6</sub>H<sub>4</sub>)<sub>3</sub>COH are marked with a red asterisk (\*). The peak at δ 5.91 ppm corresponds to the -OH peak of (*p*-Cl-C<sub>6</sub>H<sub>4</sub>)<sub>3</sub>COH and the peak at δ 5.25 ppm corresponds to the -OH peak for the internal standard. Residual solvent peaks for THF-*d*<sub>8</sub> and toluene-*d*<sub>8</sub> are marked with a blue asterisk (\*).



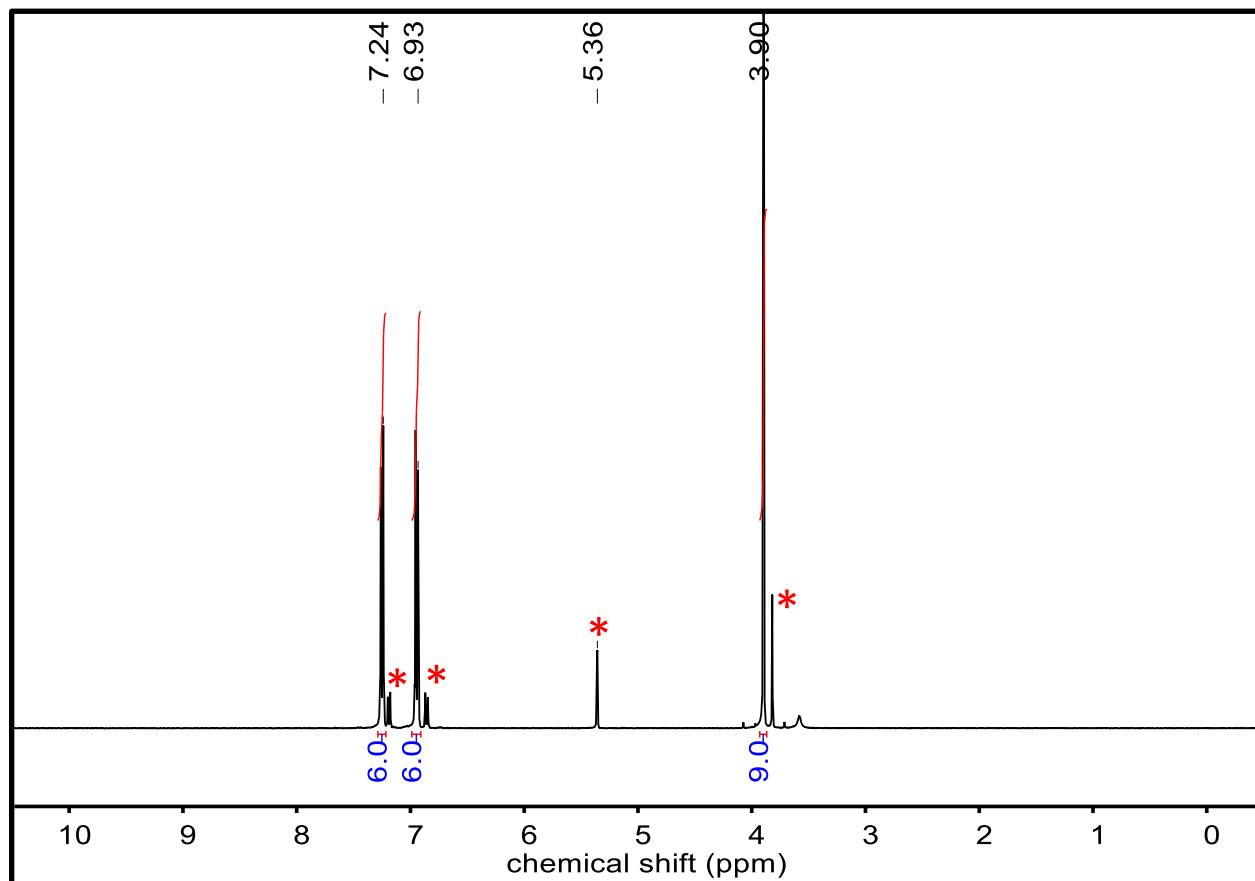

**Figure S19.** <sup>1</sup>H NMR spectrum of (*p*-OMe-C<sub>6</sub>H<sub>4</sub>)<sub>3</sub>CCl isolated from the reaction of **5** and (*p*-OMe-C<sub>6</sub>H<sub>4</sub>)<sub>3</sub>C• in CD<sub>2</sub>Cl<sub>2</sub> at 23 °C. Peaks from residual solvent and a minor impurity of (*p*-OMe-C<sub>6</sub>H<sub>4</sub>)<sub>3</sub>COH are marked with an asterisk.

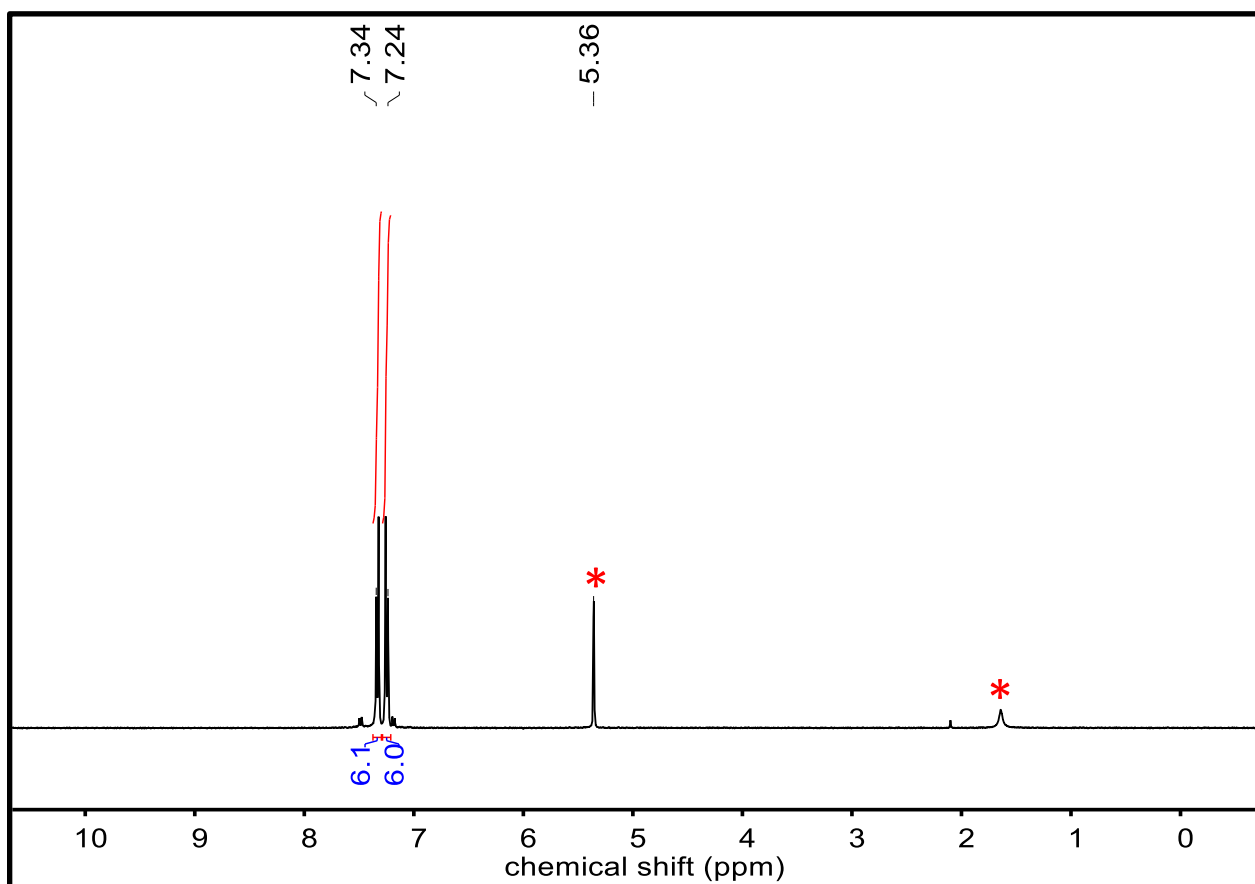

**Figure S20.**  $^1\text{H}$  NMR spectrum of  $(p\text{-Cl-C}_6\text{H}_4)_3\text{CCl}$  isolated from the reaction of **5** and  $(p\text{-Cl-C}_6\text{H}_4)_3\text{C}\cdot$  in  $\text{CD}_2\text{Cl}_2$  at 23  $^\circ\text{C}$ . Residual solvent and water peaks are marked with an asterisk.

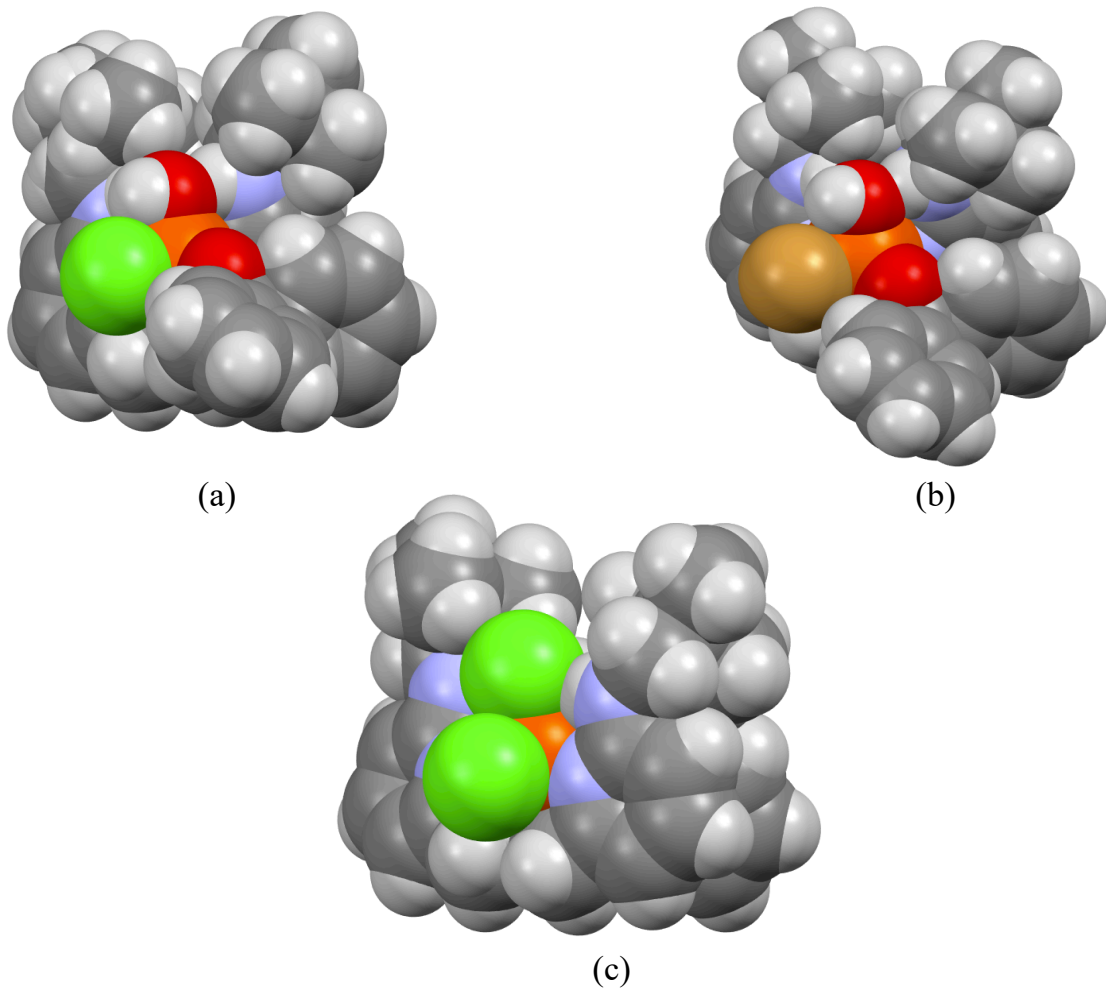

**Figure S21.** Space filling model of (a) **3**, (b) **4** and (c) **5**.

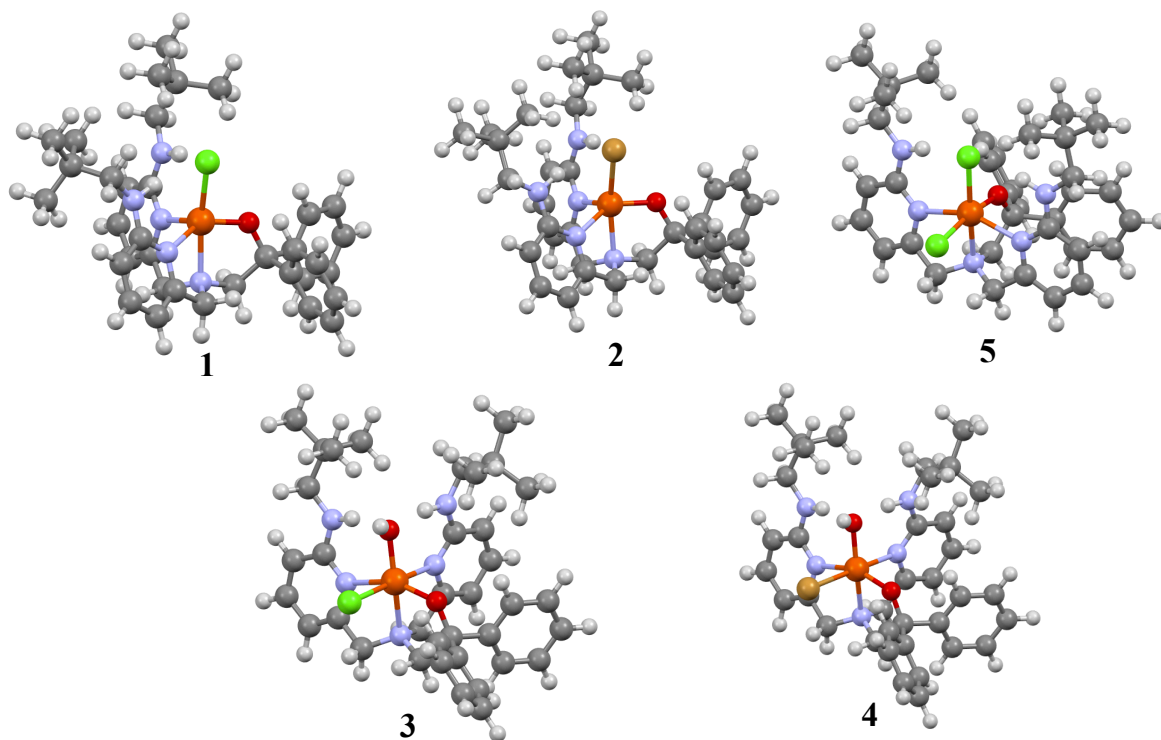

**Figure S22.** DFT optimized structure of 1 – 5 using B3LYP/6-311g\* level of theory.

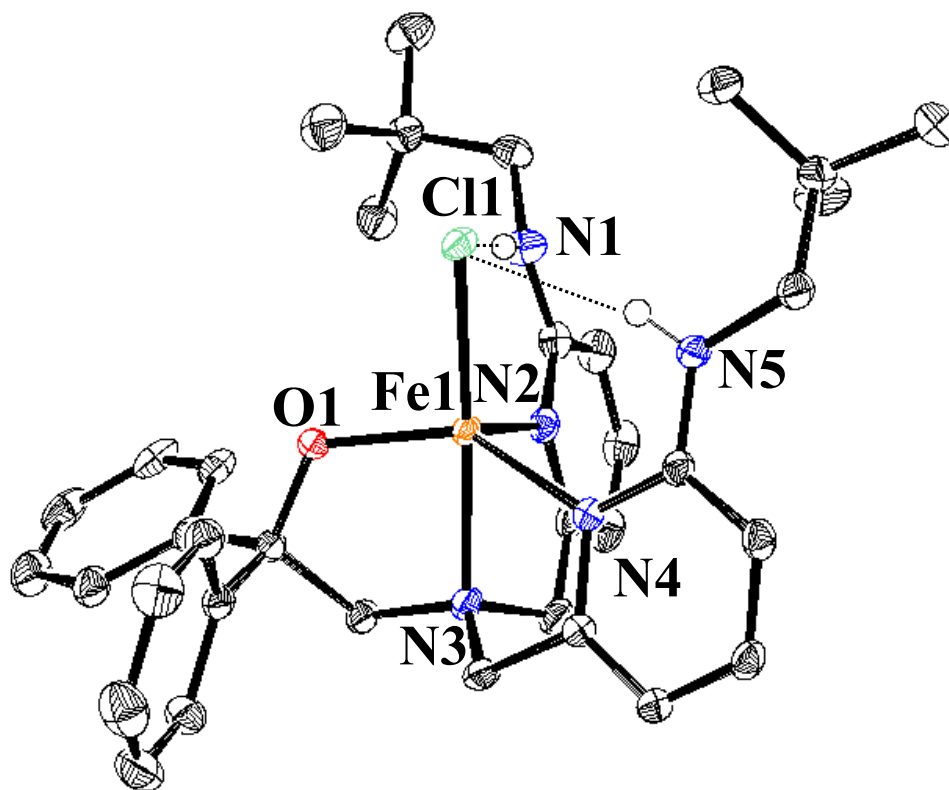

**Figure S23.** Displacement ellipsoid plot (50% probability) of  $\text{Fe}^{\text{II}}(\text{BNPA}^{\text{Ph}_2\text{O}})(\text{Cl})$  (1) at 110(2) K. H-atoms except those attached to N1 and N5 are removed for clarity.

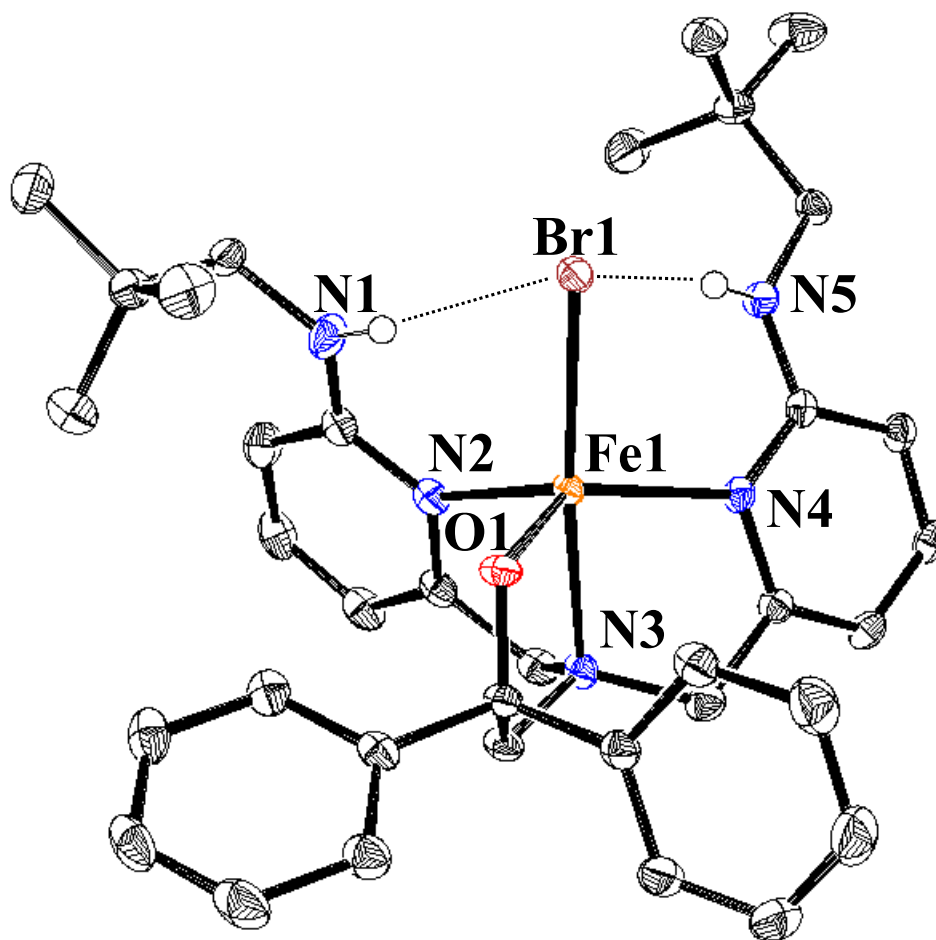

**Figure S24.** Displacement ellipsoid plot (50% probability) of  $\text{Fe}^{\text{II}}(\text{BNPA}^{\text{Ph}_2\text{O}})(\text{Br})$  (2) at 110(2) K. H-atoms except those attached to N1 and N5 are removed for clarity.

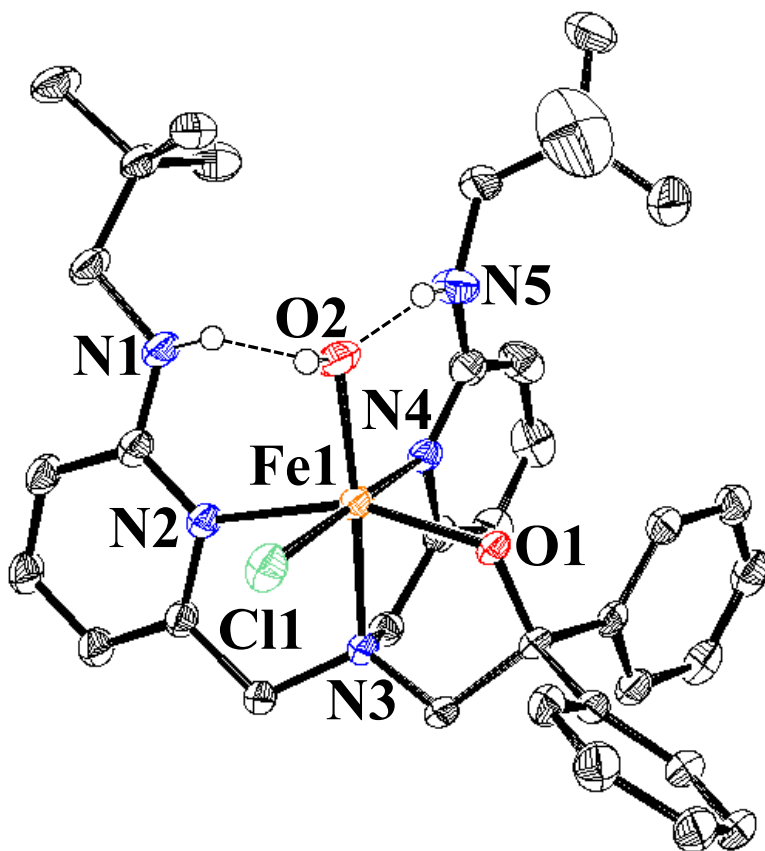

**Figure S25.** Displacement ellipsoid plot (50% probability) of  $\text{Fe}^{\text{III}}(\text{BNPA}^{\text{Ph}_2\text{O}})(\text{OH})(\text{Cl})$  (**3**) at 110(2) K. H-atoms except those attached to N1, N5 and O2 are removed for clarity.

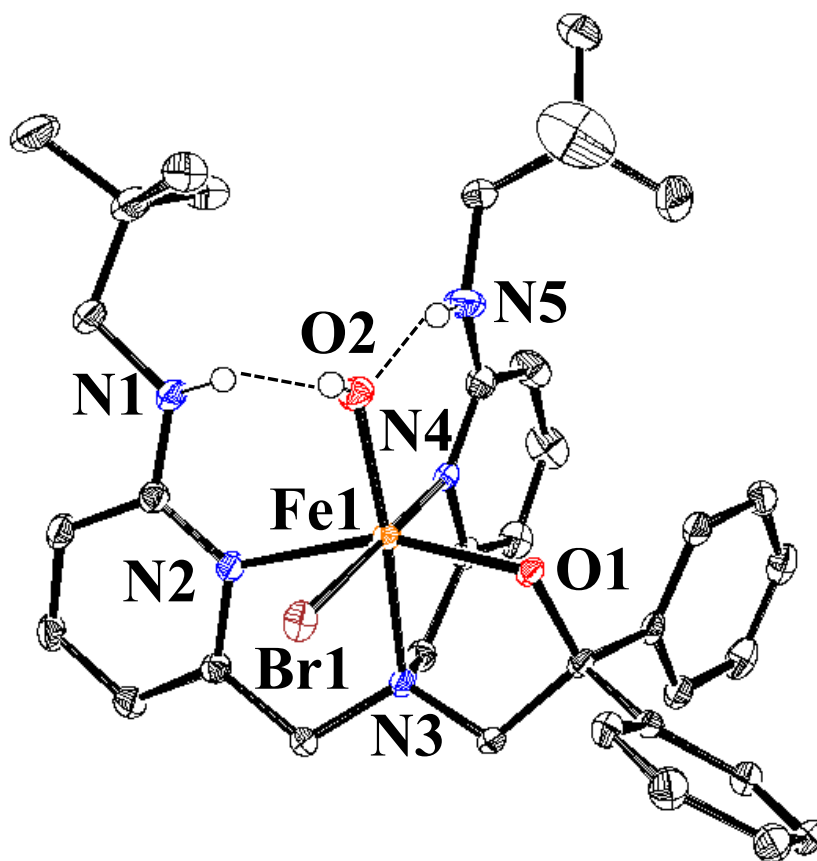

**Figure S26.** Displacement ellipsoid plot (50% probability) of  $\text{Fe}^{\text{III}}(\text{BNPA}^{\text{Ph}_2\text{O}})(\text{OH})(\text{Br})$  (**4**) at 110(2) K. H-atoms except those attached to N1, N5 and O2 are removed for clarity.



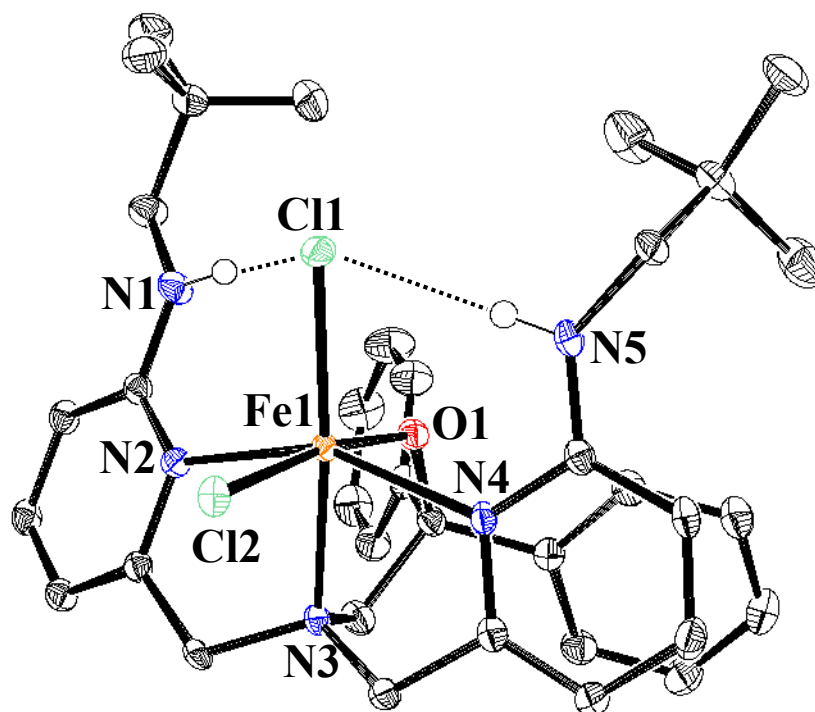

**Figure S27.** Displacement ellipsoid plot (50% probability) of  $\text{Fe}^{\text{III}}(\text{BNPA}^{\text{Ph}_2\text{O}})(\text{Cl})_2$  (**5**) at 110(2) K. H-atoms except those attached to N1, N5 and O2 are removed for clarity.

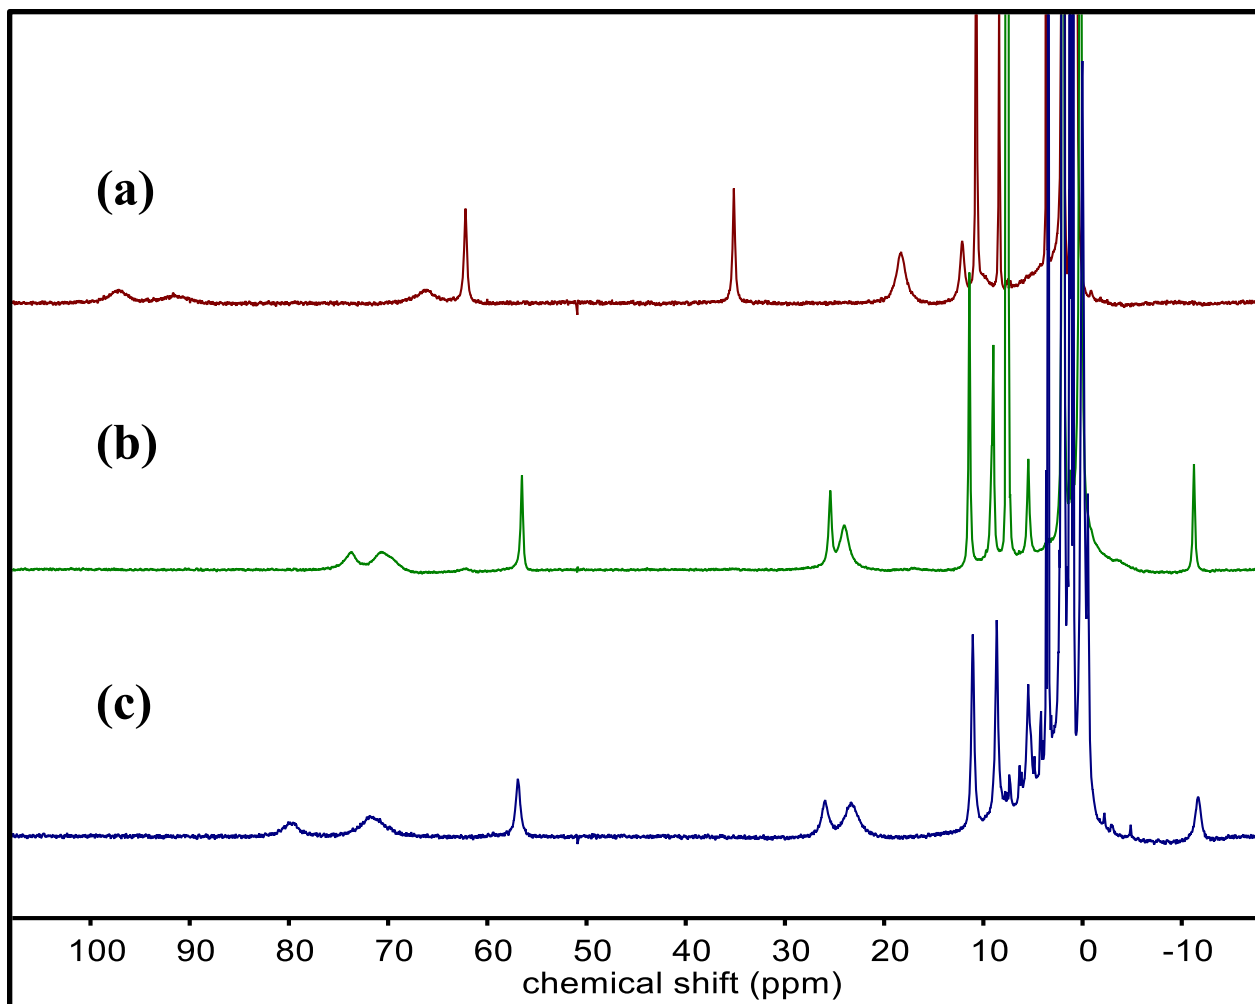

**Figure S28.**  $^1\text{H}$  NMR spectra of (a)  $^{57}\text{Fe}^{\text{II}}(\text{BNPA}^{\text{Ph}_2\text{O}})(\text{OTf})$ , (b)  $^{57}\text{Fe}^{\text{II}}(\text{BNPA}^{\text{Ph}_2\text{O}})(\text{OTf}) + \text{Bu}_4\text{NCl}$  (1 equiv) and (c)  $^{57}\text{Fe}^{\text{II}}(\text{BNPA}^{\text{Ph}_2\text{O}})(\text{OTf}) + \text{Bu}_4\text{NBr}$  (1 equiv) in  $\text{CD}_3\text{CN}$ .

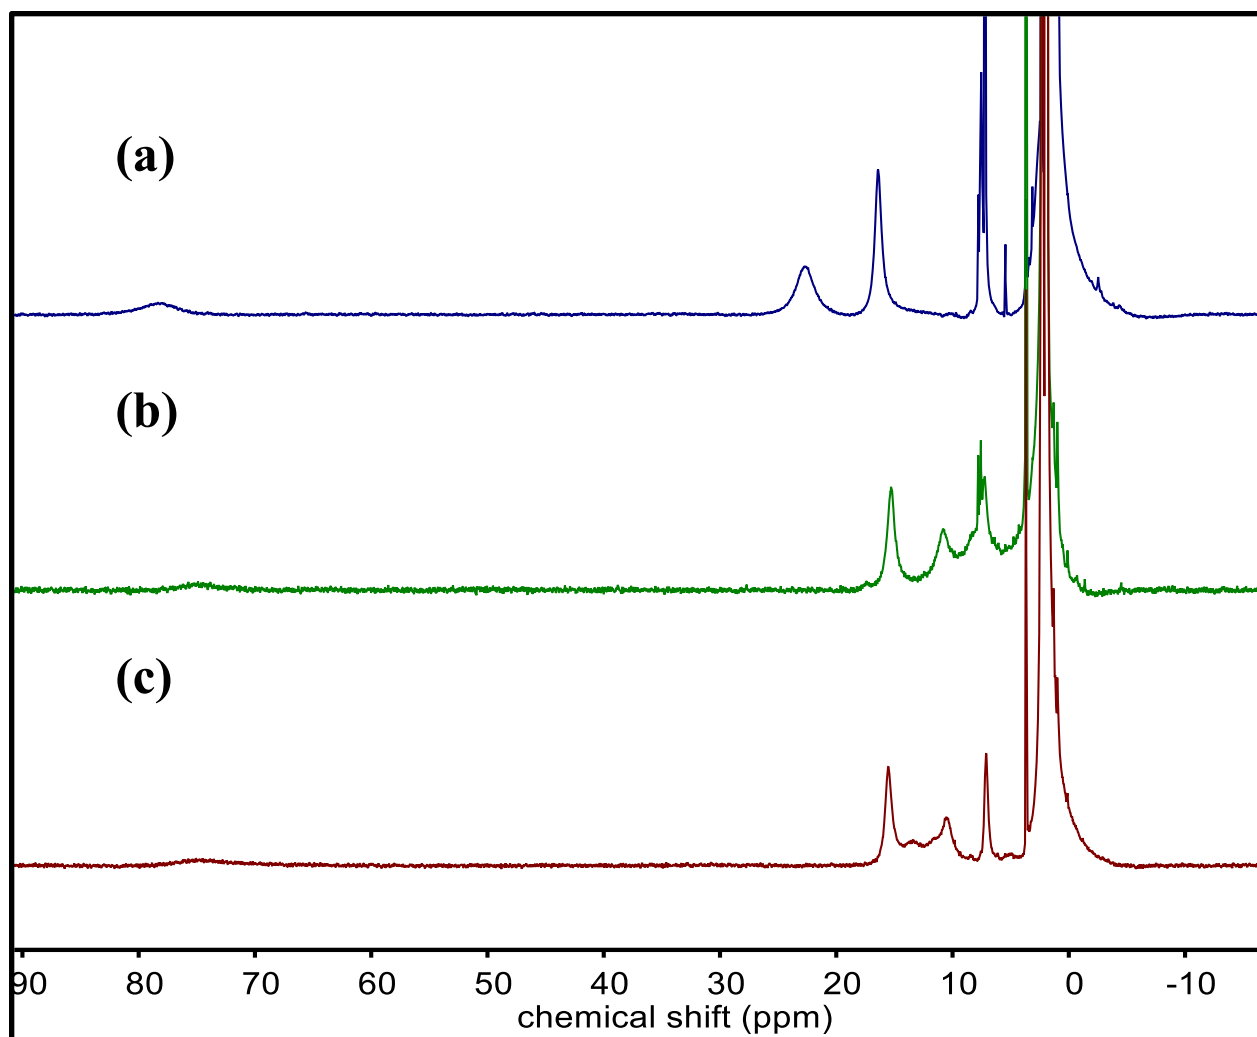

**Figure S29.**  $^1\text{H}$  NMR spectra of (a)  $^{57}\text{Fe}^{\text{III}}(\text{BNPA}^{\text{Ph}_2\text{O}})(\text{OH})(\text{OTf})$ , (b)  $^{57}\text{Fe}^{\text{III}}(\text{BNPA}^{\text{Ph}_2\text{O}})(\text{OH})(\text{OTf}) + \text{Bu}_4\text{NCl}$  (1 equiv) and (c)  $^{57}\text{Fe}^{\text{III}}(\text{BNPA}^{\text{Ph}_2\text{O}})(\text{OH})(\text{OTf}) + \text{Bu}_4\text{NBr}$  (1 equiv) in  $\text{CD}_3\text{CN}$ .

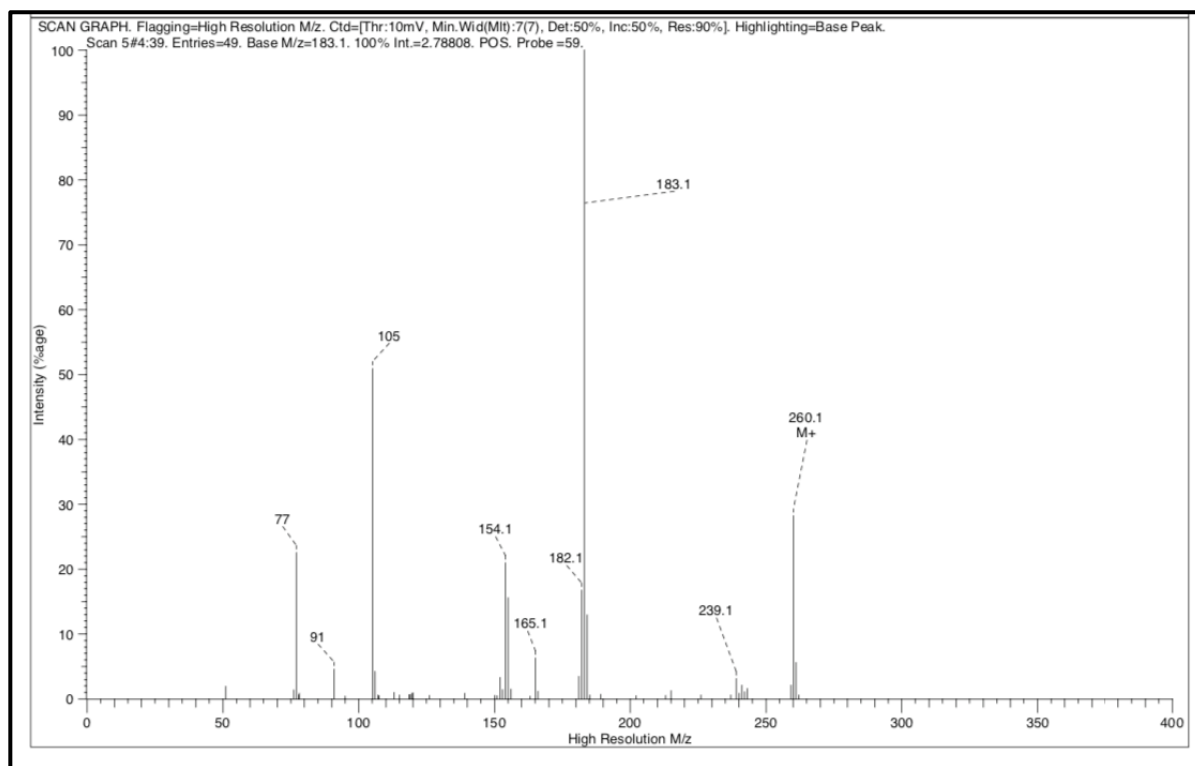

**Figure S30.** EI-MS spectrum of the reaction mixture of **3** and  $\text{Ph}_3\text{C}\cdot$  in THF at 23 °C. EI-MS:  $m/z = 260.1$  ( $\text{M}^+$ ); 260.2 calculated for  $\text{Ph}_3\text{COH}$ .

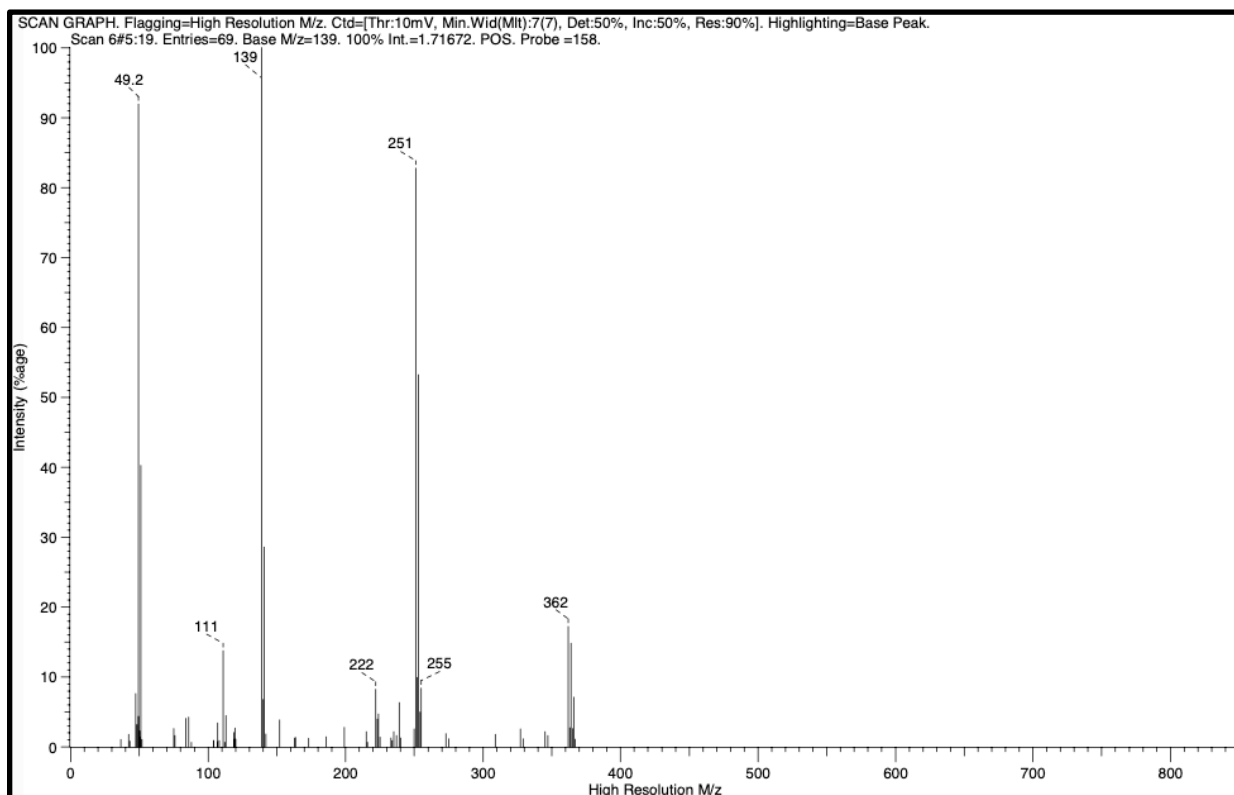

**Figure S31.** EI-MS spectrum of the reaction mixture of **4** and (*p*-Cl-C<sub>6</sub>H<sub>4</sub>)<sub>3</sub>C• in THF at 23 °C. EI-MS: *m/z* = 362 (M<sup>+</sup>); 362.2 calculated for (*p*-Cl-C<sub>6</sub>H<sub>4</sub>)<sub>3</sub>COH.

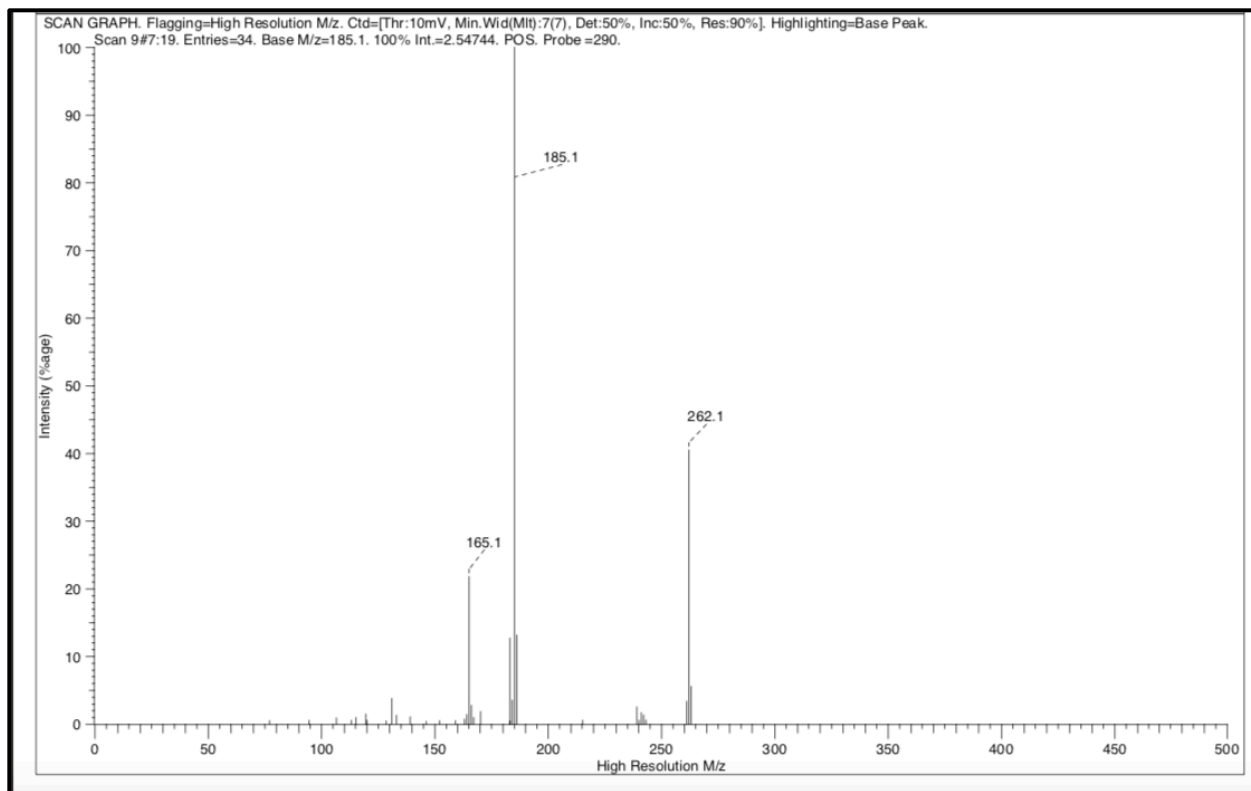

**Figure S32.** EI-MS spectrum of the reaction mixture of  $^{18}\text{O}$  labeled **3** and  $\text{Ph}_3\text{C}\cdot$  in THF at 23 °C. EI-MS:  $m/z = 262.1(\text{M}^+)$ ; 262.2 calculated for  $\text{Ph}_3\text{C}^{18}\text{OH}$ .

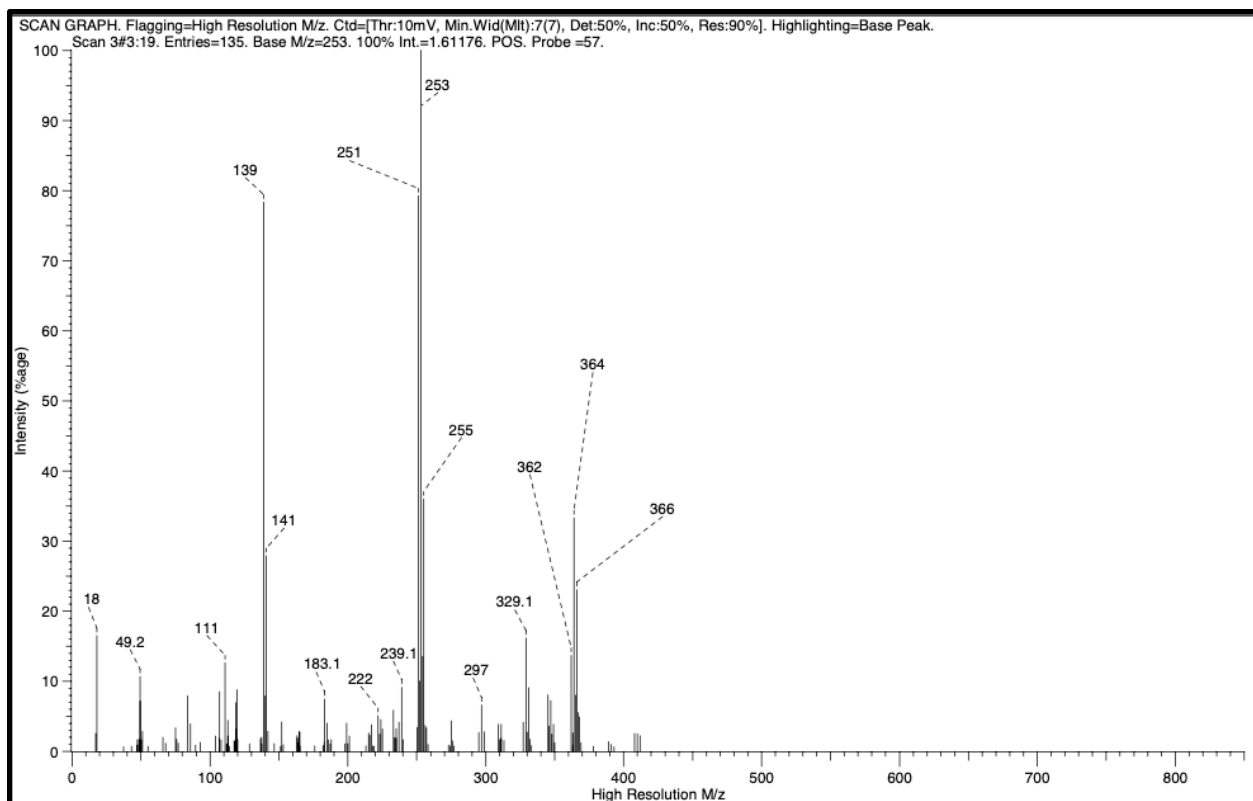

**Figure S33.** EI-MS spectrum of the reaction mixture of  $^{18}\text{O}$  labeled **4** and  $(p\text{-Cl-C}_6\text{H}_4)_3\text{C}\cdot$  in THF at 23 °C. EI-MS  $m/z = 364$  ( $\text{M}^+$ ); 364.2 calculated for  $(p\text{-Cl-C}_6\text{H}_4)_3\text{C}^{18}\text{OH}$ .

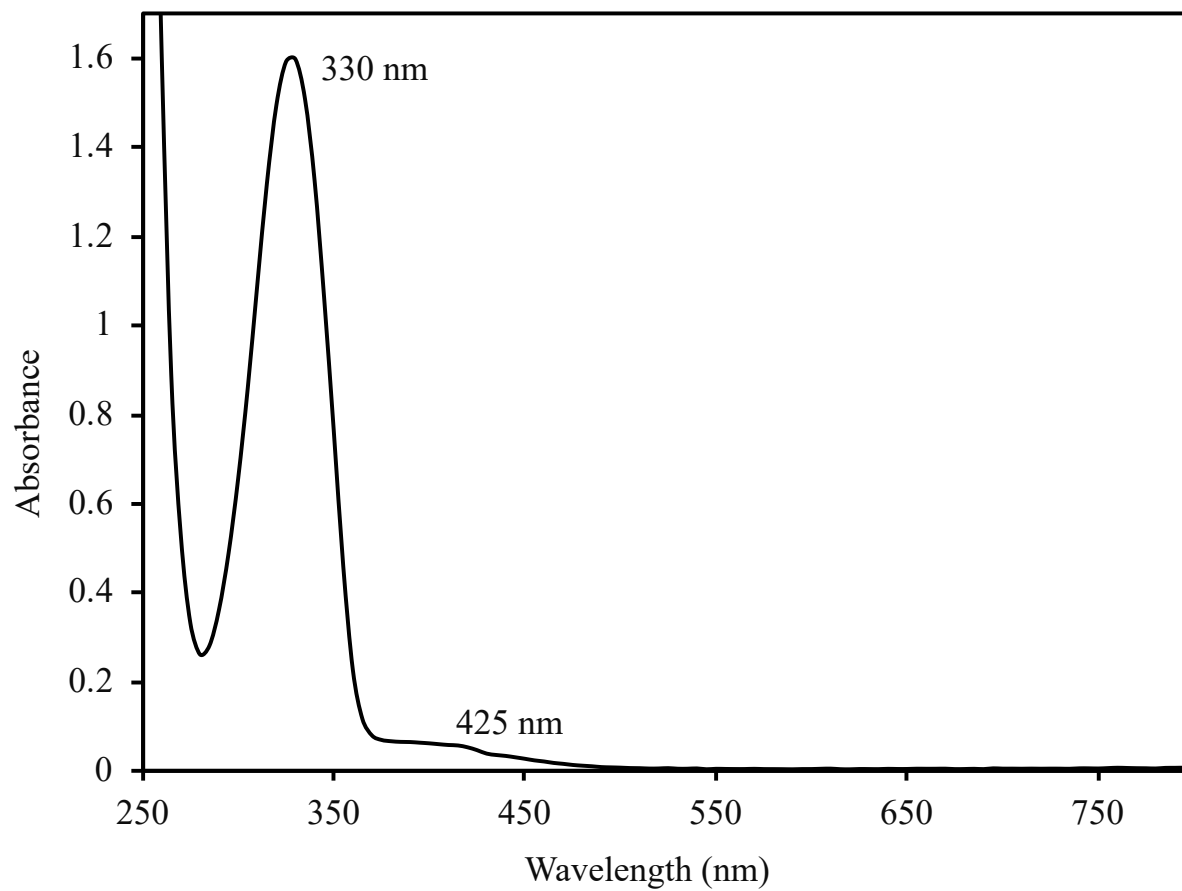

**Figure S34.** UV-vis spectrum of **1** in THF (145  $\mu$ M) at 23  $^{\circ}$ C.



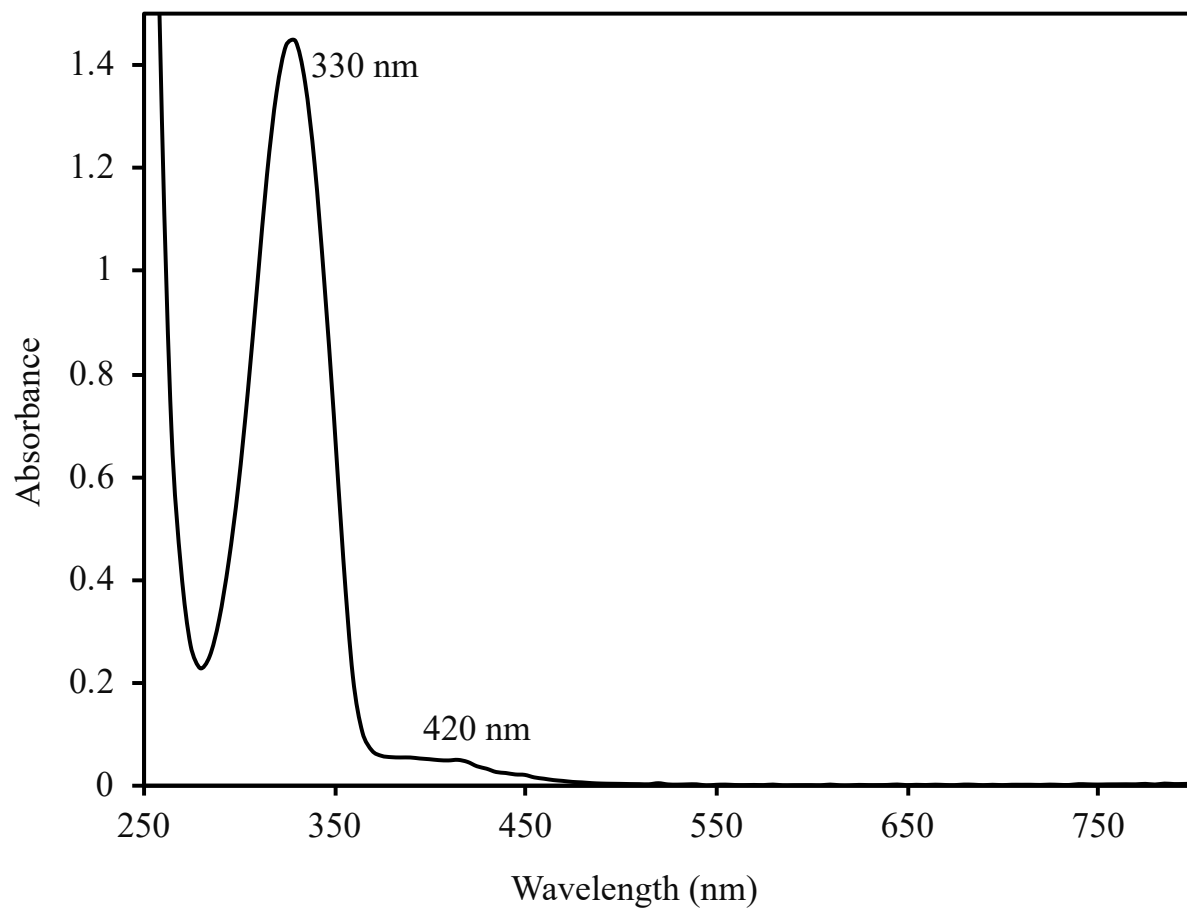

**Figure S35.** UV-vis spectrum of **2** in THF (125  $\mu$ M) at 23  $^{\circ}$ C.

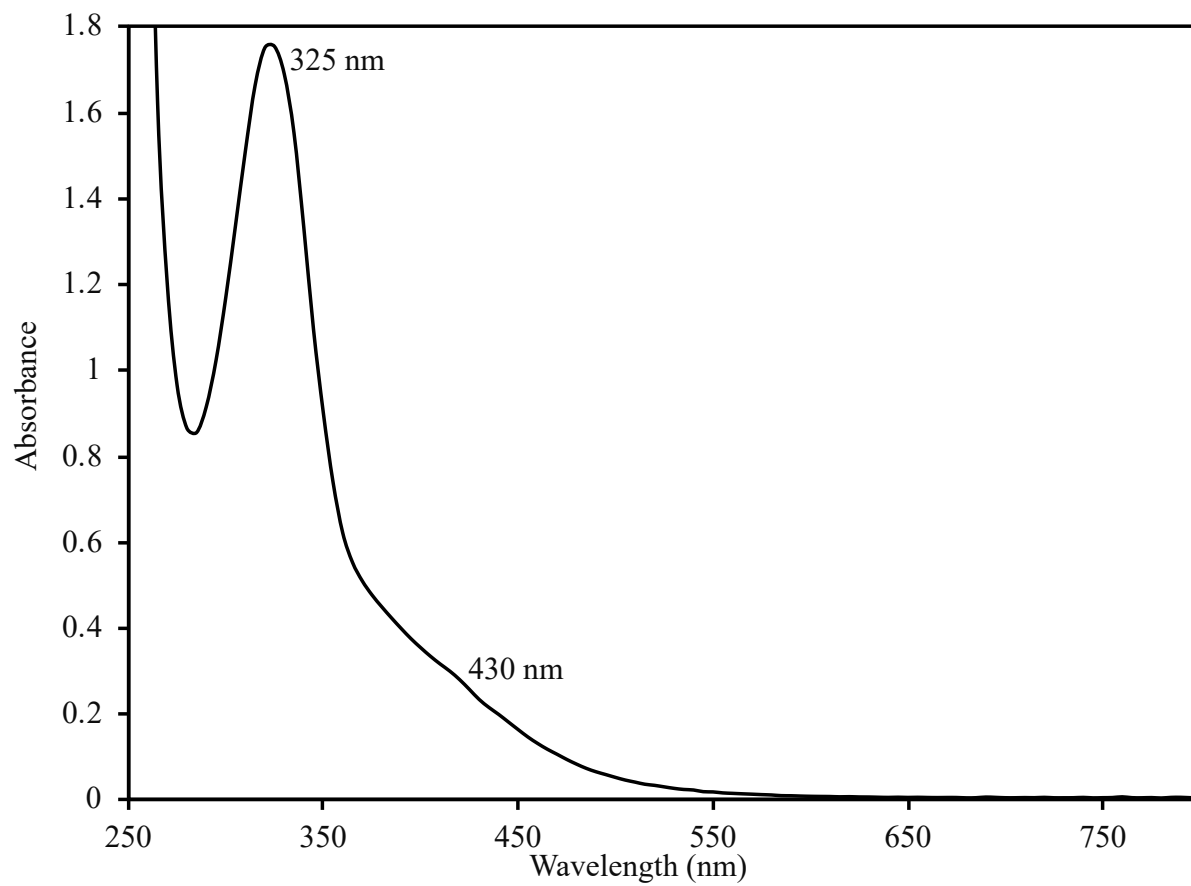

**Figure S36.** UV-vis spectrum of **3** in THF (125  $\mu$ M) at 23  $^{\circ}$ C.

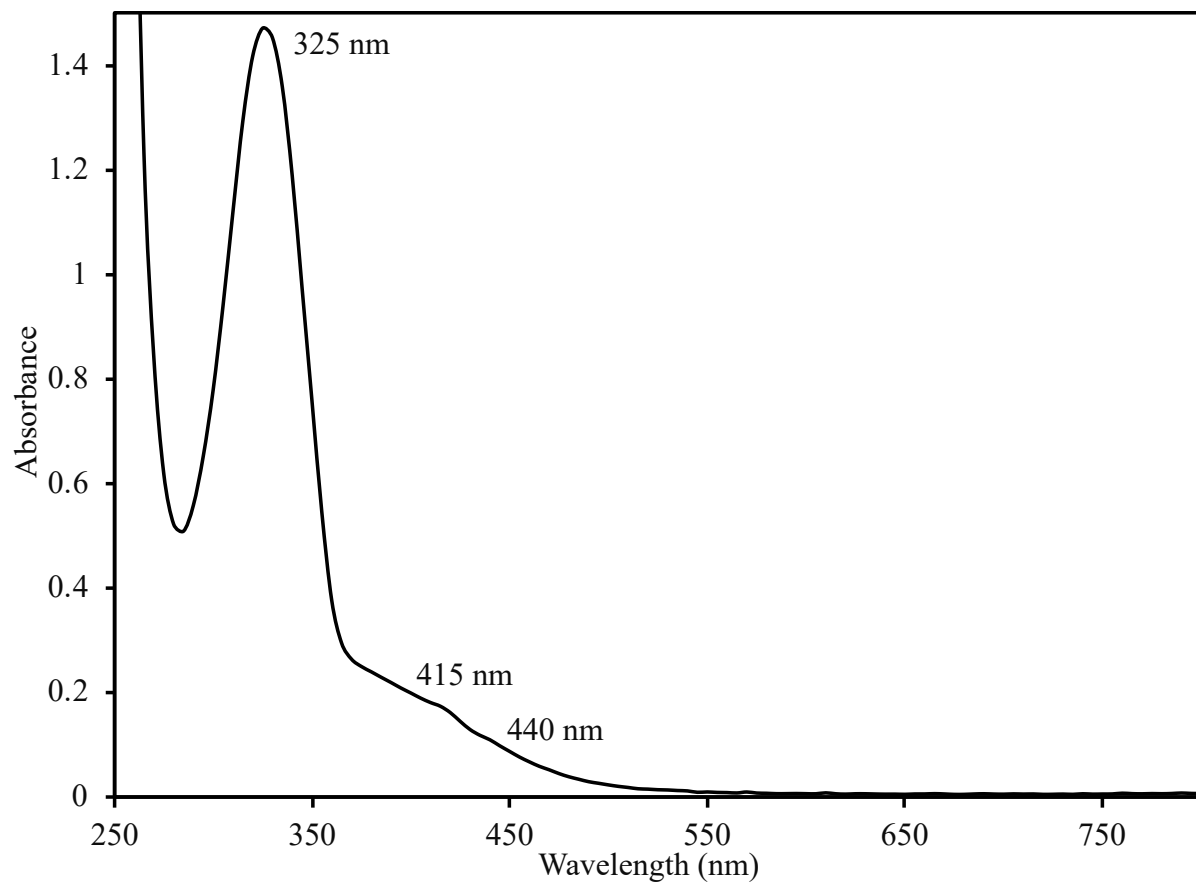

**Figure S37.** UV-vis spectrum of **4** in THF (125  $\mu$ M) at 23  $^{\circ}$ C.

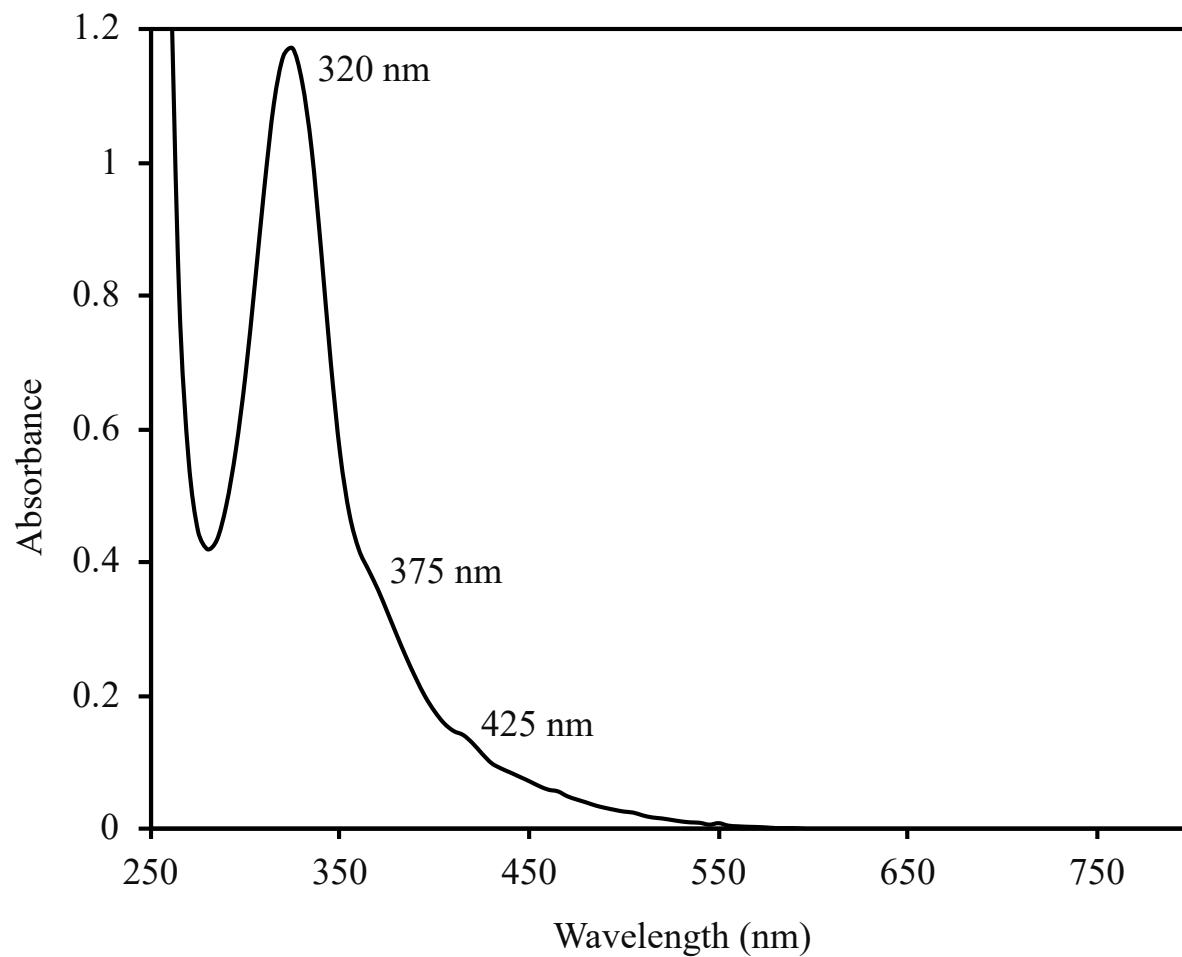

**Figure S38.** UV-vis spectrum of **5** in THF (115  $\mu$ M) at 23  $^{\circ}$ C.

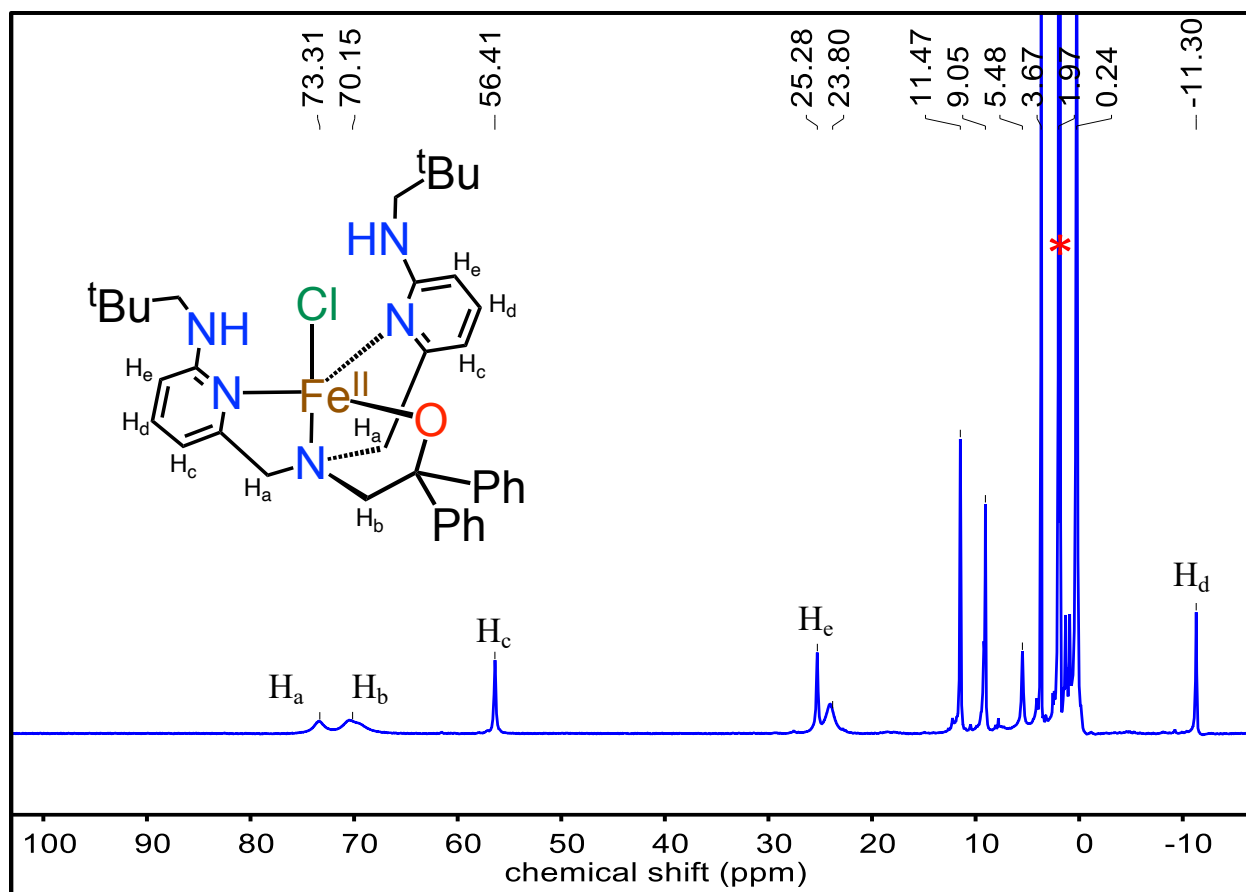

**Figure S39.** The  $^1\text{H}$  NMR spectrum of **1** in  $\text{CD}_3\text{CN}$  at  $23\text{ }^\circ\text{C}$ . The residual solvent peak for  $\text{CD}_3\text{CN}$  peak is marked with a red asterisk (\*).

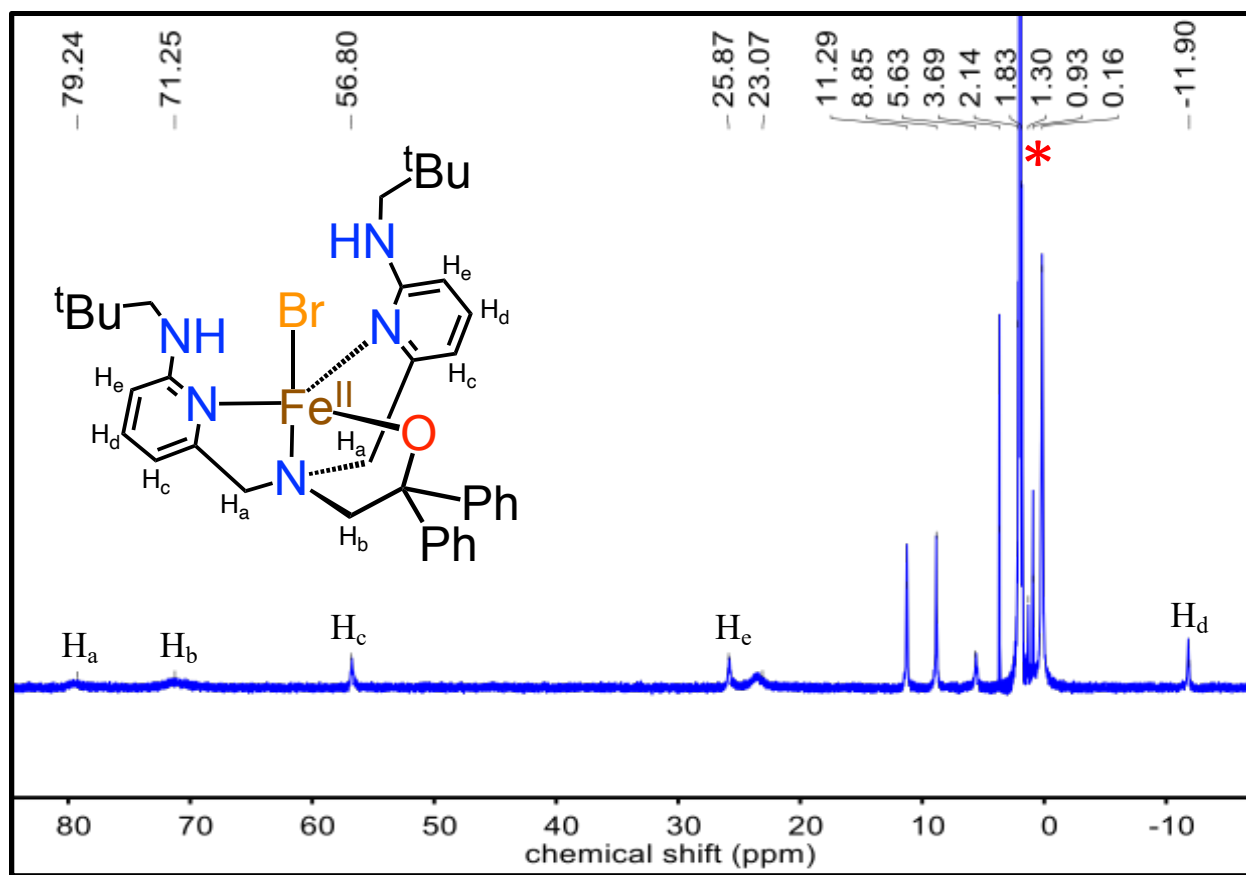

**Figure S40.** The  $^1\text{H}$  NMR spectrum of **2** in  $\text{CD}_3\text{CN}$  at  $23\text{ }^\circ\text{C}$ . The residual solvent peak for  $\text{CD}_3\text{CN}$  peak is marked with a red asterisk (\*).

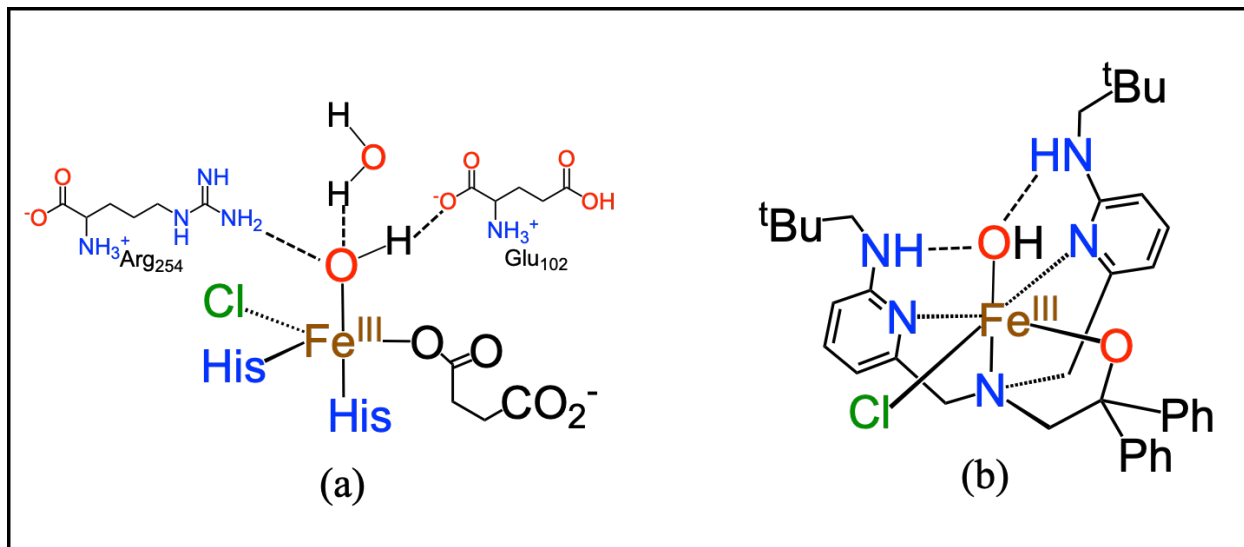

**Figure S41.** The H-bonding interactions in (a) the calculated structure of the Fe<sup>III</sup>(OH)(Cl) intermediate in the SyrB2 enzyme<sup>7, 8</sup> and (b) complex **3**.

## F. References:

1. Albano, S.; Olivo, G.; Mandolini, L.; Massera, C.; Ugozzoli, F.; Di Stefano, S., Formation of Imidazo[1,5-a]pyridine Derivatives Due to the Action of Fe<sup>2+</sup> on Dynamic Libraries of Imines. *J. Org. Chem.* **2017**, *82*, 3820.
2. Yadav, V.; Gordon, J. B.; Siegler, M. A.; Goldberg, D. P., Dioxygen-Derived Nonheme Mononuclear Fe<sup>III</sup>(OH) Complex and Its Reactivity with Carbon Radicals. *J. Am. Chem. Soc.* **2019**, *141*, 10148.
3. Zaragoza, J. P. T.; Yosca, T. H.; Siegler, M. A.; Moënné-Loccoz, P.; Green, M. T.; Goldberg, D. P., Direct Observation of Oxygen Rebound with an Iron-Hydroxide Complex. *J. Am. Chem. Soc.* **2017**, *139*, 13640.
4. Jang, E. S.; McMullin, C. L.; Käß, M.; Meyer, K.; Cundari, T. R.; Warren, T. H., Copper(II) Anilides in sp<sup>3</sup> C-H Amination. *J. Am. Chem. Soc.* **2014**, *136*, 10930.
5. Fulmer, G. R.; Miller, A. J. M.; Sherden, N. H.; Gottlieb, H. E.; Nudelman, A.; Stoltz, B. M.; Bercaw, J. E.; Goldberg, K. I., NMR Chemical Shifts of Trace Impurities: Common Laboratory Solvents, Organics, and Gases in Deuterated Solvents Relevant to the Organometallic Chemist. *Organometallics* **2010**, *29*, 2176.
6. Neese, F., Software update: the ORCA program system, version 4.0. *WIREs Comput. Mol. Sci.* **2018**, *8*, e1327.
7. Huang, J.; Li, C.; Wang, B.; Sharon, D. A.; Wu, W.; Shaik, S., Selective Chlorination of Substrates by the Halogenase SyrB2 Is Controlled by the Protein According to a Combined Quantum Mechanics/Molecular Mechanics and Molecular Dynamics Study. *ACS Catal.* **2016**, *6*, 2694.
8. Srncic, M.; Solomon, E. I., Frontier Molecular Orbital Contributions to Chlorination versus Hydroxylation Selectivity in the Non-Heme Iron Halogenase SyrB2. *J. Am. Chem. Soc.* **2017**, *139*, 2396.
